# Supplementary material for: Mortality and quality of death certification in a cohort of patients with Parkinson’s disease and matched controls in North Wales, UK at 18 years: a community-based cohort study
Source: PubMed Central journal article supplement — BMJ Open. 2018 Feb 14;8(2):e018969. doi: 10.1136/bmjopen-2017-018969 (PMC5829780; doi:10.1136/bmjopen-2017-018969), 2018-02-14
Supplement: bmjopen-2017-018969.draft_revisions.pdf [file bmjopen-2017-018969.draft_revisions.pdf]

# BMJ Open

BMJ Open is committed to open peer review. As part of this commitment we make the peer review history of every article we publish publicly available.

When an article is published we post the peer reviewers' comments and the authors' responses online. We also post the versions of the paper that were used during peer review. These are the versions that the peer review comments apply to.

The versions of the paper that follow are the versions that were submitted during the peer review process. They are not the versions of record or the final published versions. They should not be cited or distributed as the published version of this manuscript.

BMJ Open is an open access journal and the full, final, typeset and author-corrected version of record of the manuscript is available on our site with no access controls, subscription charges or pay-per-view fees (<http://bmjopen.bmj.com>).

If you have any questions on BMJ Open's open peer review process please email [editorial.bmjopen@bmj.com](mailto:editorial.bmjopen@bmj.com)

# BMJ Open

## Mortality in the Denbighshire Parkinson's disease community cohort at 18-years.

|                                 |                                                                     |
|---------------------------------|---------------------------------------------------------------------|
| Journal:                        | <i>BMJ Open</i>                                                     |
| Manuscript ID                   | bmjopen-2017-018969                                                 |
| Article Type:                   | Research                                                            |
| Date Submitted by the Author:   | 02-Aug-2017                                                         |
| Complete List of Authors:       | Hobson, Peter; Academic Unit<br>Meara, Jolyon; Academic Unit        |
| <b>Primary Subject Heading</b>: | Neurology                                                           |
| Secondary Subject Heading:      | Epidemiology                                                        |
| Keywords:                       | Parkinson-s disease < NEUROLOGY, EPIDEMIOLOGY, Dementia < NEUROLOGY |
|                                 |                                                                     |

SCHOLARONE™  
Manuscripts

Peer Review Only

1  
2  
3  
4  
5  
6  
7  
8  
9  
10  
11  
12  
13  
14  
15  
16  
17  
18  
19  
20  
21  
22  
23  
24  
25  
26  
27  
28  
29  
30  
31  
32  
33  
34  
35  
36  
37  
38  
39  
40  
41  
42  
43  
44  
45  
46  
47  
48  
49  
50  
51  
52  
53  
54  
55  
56  
57  
58  
59  
60

**Mortality in the Denbighshire Parkinson's disease community cohort at 18-years.**

Peter Hobson<sup>1</sup>, Jolyon Meara<sup>1</sup>

<sup>1</sup>Academic Unit,  
Betsi Cadwaladr University Health Board,  
Glan Clwyd Hospital,  
Rhyl, United Kingdom

Correspondence to  
Dr Peter Hobson; peter.hobson@wales.nhs.uk

Academic Unit,  
Betsi Cadwaladr University Health Board  
Glan Clwyd Hospital,  
Sarn Lane,  
Bodelwyddan,  
LL18 5UJ, United Kingdom  
Ph: +44 1745 448788

Keywords:

Word count: 3267

## Abstract

**Objective:** To examine the reported causes of death in a community cohort of Parkinson's disease (PD) patients.

**Setting and participants:** A total of 166 PD patients and 102 controls were included in this investigation. Hospital and primary care records were employed to ascertain the number of individuals who died during the investigation period. The primary and underlying cause of death was extracted from certificates obtained from the United Kingdom General Register Office.

**Results:** There were 158 (95%) deaths in the PD and 34 (33%) deaths recorded in the control cohort. The Standard Mortality Rate (SMR) was 1.82 (95% CI: 1.55 – 2.13). Controlling for prevalent PD cases at baseline (n =80), the SMR was 1.72 (95% CI: 1.36 – 2.17), indicating that there was no excess mortality between the prevalent and incident cases ( $p < 0.186$ ). The main cause of death reported in the PD cohort was pneumonia (52%), followed by cardiac related deaths (21%). PD as the primary or underlying cause was not reported in 75/158 (47%) of the cohort. In addition, although 144 of the cohort had a diagnosis of dementia, this was reported in less than 10% (n=14) of their death certificates.

**Conclusion:** This community based investigation established that PD is associated with a higher risk of mortality compared to the general population. In addition, we found that the majority of patients with PD if they survive long enough will develop dementia. However, the reporting of PD and dementia as a cause or underlying cause of death on certificates was found to be suboptimal. The results from this investigation suggest that use of mortality statistics alone in epidemiological studies, healthcare planning and provision need to be reconsidered, because they are not a valid or reliable source of data capture.

## Strengths and limitations

- Community based longitudinal follow-up cohort design
- All patients fulfilled diagnostic criteria for Parkinson's disease and or dementia.
- Baseline and subsequent repeat measure data capture allowed analysis for predictive outcomes.
- Prevalent and incident cases of Parkinson's disease were included in the cohort, although this was controlled for in the analysis.
- Control cohort included subjects without known neurological condition and thus may have intruded bias in the outcome comparisons with the Parkinson's disease patients.

## Introduction

Data drawn from death certificates is often employed by epidemiological, public health and research scientists to capture the incidence, prevalence and mortality in populations. In addition, these statistics are often utilized in the evaluation of public health interventions, setting priorities for medical research and health services, the planning of health services, and the clinical assessment of the effectiveness of those services. [1-3] The introduction of the revised International Classification of Diseases (ICD) system in 2001 aim was to improve the accuracy in the reported cause of death, where underlying conditions, mentioned in Part 1 or 2 of death certification take priority over others. [4,5] The underlying principle for this is that reporting of multiple causes of death should provide a better description of a particular disease or condition, allowing for more effective and meaningful data capture. The reliability of statistical information extracted from death certificates however still remains uncertain, where for example, rather than the underlying chronic condition being reported, a secondary cause of death is often reported as the main cause of death. [6-14]

Increasing elderly population demographic changes worldwide along with exponential rises in chronic conditions, will most likely place greater social and fiscal demands on existing clinical health and social services. [15] To ensure that mortality and survival rates are more precisely captured for these chronic conditions, the relative contributions different diseases have upon survival and mortality need to be more accurately measured. The challenge is to ensure that more reliable data is recorded to allow for more efficient planning for healthcare services and clinical interventions. Parkinson's disease (PD) is a progressive neurodegenerative disease strongly associated with increased mortality and lower life expectancy than the general population. [16-28] In addition to the motor symptoms of PD, many patients often live with a significant number of other non-motor conditions which contribute to the symptomatology of the disease. [29-34] In particular, dementia occurs frequently in the elderly PD patient and has been shown to be a strong predictor for increased mortality. [25,35-45] This most probably has implications for the quality of death certification, which in previous investigations has been found to be inconsistent, under recorded or an inaccurate record of the cause of death in patients. [26,27,46-49] The methodological design of previous investigations, where cohorts have been drawn from clinical populations or pharmaceutical trails alone may partially explain the variability between studies.[50-52] Only a small number of investigations have employed prospective community study methods to ascertain the utility of death certification in PD, and furthermore few have included a comparison control group.

The aim of the present investigation is to examine the reported cause of death in a community cohort of PD patients and comparable group of individual's in the general population without neurological disease from the same geographical area. This will allow for exploration of the quality of death certification in these

1  
2  
3 individuals and to determine how often PD and or dementia is  
4 reported as a contributor to death in these individuals.

## 5 6 **Methods**

### 7 8 **Patient and Control subjects**

9  
10 The PD Denbighshire cohort study provided data for analysis in the  
11 current investigation. [25,37,53] This cohort and the control cohort  
12 were drawn from a geographically defined area in North Wales  
13 United Kingdom (UK), and followed from 1997-2015. At study entry  
14 166 patients all of whom met clinical criteria for probable PD were  
15 reviewed. [54] The causes of death were compared with a control  
16 cohort (n = 102) recruited from General Practitioner practices within  
17 the same geographical area from which the PD group was drawn.  
18 The control cohort were initially screened for possible signs of  
19 parkinsonism, Alzheimer's disease, history of a previous stroke,  
20 any other neurological or neurocognitive disorder, if they were  
21 found to have been treated with any psychoactive drugs, or a  
22 significant psychiatric, alcohol or substance abuse history. The  
23 included control subjects were matched for sex and of similar age  
24 to PD patients ( $\pm 3$  years).

25  
26 The PD cohort at study entry were assessed with the Hoehn and  
27 Yahr staging (H&Y), the UPDRS motor subsection, the 15-item  
28 Geriatric Depression Scale (GDS), the Cambridge Examination for  
29 Mental Disorders of the Elderly (CAMDEX), section B (CAMCOG),  
30 the Parkinson's disease Activities of Daily Living Scale (PADL) and  
31 the EuroQol, health related quality of life (HRQoL) measure.[16,55-  
32 59] Demographic variables were recorded which included age,  
33 gender, educational attainment, social class, onset age of PD  
34 diagnosis, and the duration of PD symptoms. The diagnosis of  
35 dementia was based upon neuropsychological assessment,  
36 patient, and carer/informant interviews, along with the application of  
37 the Diagnostic and Statistical Manual of Mental disorders fourth  
38 edition criteria. [60]

### 39 40 **Death certification collection and evaluation.**

41  
42 Review of hospital and primary care records were employed to  
43 ascertain the number of individuals who were deceased. All of the  
44 death certificates in this investigation were obtained from the local  
45 Births, Deaths, and Marriages central record office for the PD and  
46 control cohorts. Primary and underlying cause of death, along with  
47 the age of the subject and the age of death are recorded on all  
48 certificates in the UK. In addition, all certificates completed by a  
49 doctor within the UK and are coded using the ICD-10 system as  
50 follows:

51 Ia: Disease or condition leading directly to death.

52 I(b): Other disease or condition, if any, leading to I(a).

53 I(c): Other disease or condition, if any, leading to I(b)

54 II: Other significant conditions that contributing to death but not  
55 related to the disease or condition causing it.

1  
2  
3 From the information recorded on the death certificates, we  
4 grouped primary and underlying causes of death in to nine further  
5 categories which were, PD, Sepsis, Dementia, Cerebrovascular,  
6 Cardiac, Cancer, Pneumonia, Chronic lung disease, other  
7 disorders.

### 8 **Statistics.**

9  
10 The age- and sex-specific standardised mortality ratios (SMR) were  
11 calculated for men and women by dividing the observed number of  
12 deaths in each group by the expected number of deaths in each  
13 group. The expected numbers of deaths were calculated using the  
14 published UK age- and sex-specific Office of National Statistics  
15 (ONS).

16  
17 Descriptive statistics (mean, SD, median) were used for continuous  
18 variables, whereas categorical variables were described as  
19 percentages of subjects in each group. Student t-tests, the chi-  
20 square test, and Univariate logrank statistics were employed to  
21 examine between-group differences and between observed and  
22 expected survival curves (all values two-tailed,  $p < 0.05$ ). The  
23 survival time of subjects was calculated from the date of baseline  
24 examination. The Kaplan-Meier estimates were used to calculate  
25 the observed survival curves. Cox proportional hazard analysis was  
26 employed to investigate if one or more covariates were related to  
27 mortality. Cox proportional hazards and Cox time-dependent  
28 models were used for the multivariate analysis. All data were  
29 analysed with the SPSS statistical package version 19. [61] The  
30 relative risk (RR) and 95% confidence interval (CI) were calculated  
31 using the Altman formula and MedCalc software. [62,63]  
32  
33

### 34 **Results**

35  
36 From baseline to the study end date (30/12/2015), 158/166 (96%)  
37 of the PD and 34/102 (33%) of the control cohorts were decedents.  
38 In Table 1 the demographic and clinical outcomes of the PD and  
39 control cohorts are shown. Figure 1 illustrates the Kaplan-Meier  
40 survival curves for all cause mortality in the PD and control cohorts.  
41 The SMR for the whole PD cohort compared to the England &  
42 Wales 2013 population was 1.82 (95% CI: 1.55 – 2.13). Comparing  
43 prevalent and incident cases survival revealed an SMR of 1.72  
44 (95% CI: 1.36 – 2.17), which indicated a non significant ( $p < 0.186$ )  
45 excess mortality between the groups (Figure 2). There were no  
46 statistical differences found between the PD and control cohorts  
47 age at death (PD cohort 80.7 (7.1), Control cohort 81.9(6.3);  $z =$   
48 0.640;  $p > 0.552$ ). The strongest predictor for mortality in the PD  
49 cohort was the worsening motor symptoms (HR 1.06,  $p < 0.01$ ).  
50 As a primary cause of death (Part 1a on UK death certificates), PD  
51 was recorded in just over 4% of the cohort. In sections 1b and 1c  
52 (conditions substantially contributing to death), PD was reported in  
53 24% and 6% of cases respectively. In section II of the death  
54 certificates (co-morbid conditions substantially contributing to  
55 death); PD was reported in 19% of cases. Overall, PD as a  
56 contributing factor in the cause of death, was not reported  
57  
58  
59  
60



anywhere on 75/158 (47%) of the cohort certificates. The primary cause of death for the PD and control cohorts is shown in figures 3 & 4. The most common cause of death reported within the PD cohort (figure 2) was pneumonia (52%), followed by cardiac related deaths (21%). The most frequently recorded cause of death within the control cohort (figure 3) was cardiac disease (26%), cancer (24%), and pneumonia (18%). A comparison between the PD and Control cohorts revealed that the PD cohort were nearly three times more likely to have pneumonia recorded as a primary cause of death (RR, 2.94, 95% CI 1.40-6.19). Controlling for patients and controls with dementia still revealed a higher risk of mortality in PD for pneumonia (RR, 2.03, 95% CI 1.34-3.6). The controls compared to the PD cohort had over a threefold increased risk of having a cancer related disorder recorded as a primary or underlying cause of death (RR, 3.72, 95% CI 1.58 -8.72).

Disease progression within the PD cohort was significantly associated with a worsening HRQoL at death ( $z = 4.5$ ;  $p < 0.0001$ ). When compared to the controls, HRQoL was significantly poorer for the PD cohort ( $z = 3.29$ ;  $p < 0.001$ ). At the time of death, 83/158 (52%) of the PD and 9/34 (26%) of the control cohorts were living in institutional care ( $z = 2.96$ ,  $p < 0.003$ ). Overall, the PD cohort decedents had a threefold increased probability to be living in institutional care at death (RR 3.23, 95% CI 1.4-7.41). Controlling for age and duration of illness, the PD cohort living in institutional care were also more likely to be demented (RR 2.7 (95% CI 1.21- 5.76). In contrast to the PD cohort, the control decedent's place of death was more likely to be in hospital (RR, 1.97, 1.48-2.62).

As a primary or underlying cause of death, dementia was underreported on both the PD and control certificates. Although 144/158 (91%) of the PD cohort had a diagnosis of dementia before their deaths, it was reported in only 14/144 of certificates. Similarly, only two of the control cohort had dementia recorded anywhere as a primary or underlying cause of death. Upon review however, a further four at the time of death had a confirmed diagnosis of dementia.

## Discussion.

This investigation reports the cause of death recorded on the death certificates of PD and age matched control cohorts in Denbighshire in the UK. We have previously reported that the life expectancy and average age at death in this PD cohort is much lower than the general population. [25] In the current study the overall SMR for our PD cohort was 1.82, indicating an excess mortality, which remained even after controlling for prevalent cases of PD at baseline (SMR 1.72). This is similar to previous investigations where the SMR has been reported to range from 1.5 to 2.5. [22-26,28,49] However, recent community based incident cohort and incident clinical cohort investigations have reported lower SMR's of 1.29 (95% CI, 0.97-1.61), and 1.39 (95% CI, 1.10.-1.50), suggesting a moderate increase mortality compared to the general population. [28,64] The shorter duration of PD diagnosis, lower number of recorded deaths and shorter follow-up period compared with the current



1  
2  
3 investigation may partially explain these differences the current and  
4 previously reported UK investigation. In addition the Spanish  
5 investigation was limited by the retrospective analysis of a data set  
6 from 1978-1998 and recruitment solely from a clinical population.  
7

8 Overall death certification and clinical research data appear to  
9 provide quite disparate mortality data in PD. Although our PD  
10 cohort had confirmed UKPDSBB criteria for probable PD, as a  
11 primary cause of death (Part 1a), it was recorded in just in over 4%  
12 of the cohort. A further 30% had PD recorded in parts 1b and c of  
13 their death certificates, and on Part II of certificates it was recorded  
14 in a further 19% of cases. Overall, PD was not cited anywhere on  
15 47% of the death certificates, which falls approximately midway  
16 with previous certification studies of between 14–70%.  
17 [22,26,27,46-49] The disparity reported between studies is most  
18 likely evidence of the differing methodologies employed such as,  
19 populations drawn from pharmaceutical trials alone, clinical  
20 samples, or retrospective case or chart record analysis.  
21

22 Pneumonia was the most cited primary cause of death (52%), with  
23 near a threefold higher increased risk compared to the controls,  
24 which has been frequently reported in other investigations. [22,26-  
25 30,38,64] Patients with PD, particularly as they become frailer with  
26 the progression of their illness, are at greater risk for pulmonary  
27 complications, due to obstructive ventilation dysfunction, upper  
28 airway dysfunction, and weakened strength of respiratory muscles.  
29 [65-68] The most frequently reported other causes of death were  
30 cardiovascular disease (21%), cerebrovascular disease (8%) and  
31 malignancy (6%).  
32

33 This is the first study to our knowledge to describe underreporting  
34 of dementia as a primary, or underlying cause of death in a  
35 community based PD cohort. We have previously reported in this  
36 cohort the high prevalence of dementia of around 90%. [69] Upon  
37 review of the decedents death certificates, we found that less than  
38 10% had any mention of dementia as an immediate or underlying  
39 cause of death. Previous general population investigations have  
40 also shown that rates of certification mentioning dementia as a  
41 main or underlying cause of death have been consistently under  
42 reported. [70-73] This perhaps is because certification tends to  
43 focus upon the immediate cause of death and does not really  
44 capture the multiple factors that contribute to death, particularly  
45 with elderly individuals with multiple co-morbidities.  
46

47 This investigation found that the progression of PD motor severity,  
48 poorer HRQoL and dementia increased the likelihood of entering  
49 and residing in long term care before death. This may be a  
50 reflection of the duration, nature and the type of burden PD places  
51 upon relatives, especially those who have physical frailty  
52 themselves. Caring within the home setting may therefore become  
53 more impracticable and thus possibly precipitates entry into  
54 institutional care. The proportion of deaths in long term care  
55 amongst the PD cohort was also significantly higher than the  
56 control cohort. In contrast, the number of hospital deaths in the PD  
57 cohort was significantly lower than the control cohort (37% vs.  
58  
59  
60

1  
2  
3 73%) and more patients died at home (other than a long care  
4 setting) compared to the controls (16% vs.12%). A recent study  
5 reported wide variations in the place of death of people with PD  
6 throughout the world, concluding that individual preference, social  
7 and socioeconomic circumstances; cultural, organisation and  
8 provision of health and palliative care all contribute to some extent  
9 the place of death. [74]

10  
11 In common with previous mortality investigations we found fewer  
12 recorded cancer deaths within the PD cohort. [75] It is thought that  
13 mutations of the PARK2 (Parkin) gene found in 6-8% of PD  
14 patients may act in some cancers as a tumour suppressor proteins.  
15 [76] The absence or mutation of the Parkin gene is found in several  
16 tumour types, suggesting that the mechanisms of cell death in PD  
17 may play a role in the inhibition or formation of some cancers. [77]  
18 The decreased risk of mortality from cancer has also been reported  
19 in other neurodegenerative disease including Alzheimer's,  
20 Huntington's disease and in populations where mild to moderate  
21 with cognitive impairment has also been observed. [78-81 Further  
22 studies are needed to explore the associations, risks, possible  
23 genetic markers and underlying mechanisms in PD and other  
24 neurodegenerative conditions, to improve and identify and  
25 understand the role of cell death and its decreased cancer risk.

26  
27 We would caution the message often given to PD patients that they  
28 die with, rather than die of the condition. The non-motor features of  
29 PD such as dementia and autonomic dysfunction are frequently  
30 observed in all stages of the disease and most likely make a  
31 significant contribution to mortality.[82] A recent investigation  
32 reported that autonomic dysfunction and dementia in PD was  
33 predictive of increased mortality particularly in patients with  
34 orthostatic hypotension (OH).[83] Another meta-analysis which  
35 explored the association with OH and mortality in general  
36 populations also concluded that OH may confer a greater risk (RR,  
37 1.40) for mortality. [84] The association between the non-motor  
38 features of PD disease and mortality needs further research to  
39 understand and determine if these are causal or not.

40  
41 This study's strengths are the robust follow-up over an 18-year  
42 period of a community based cohort all of whom fulfilled criteria for  
43 PD and diagnostic re-evaluation was reviewed regularly over this  
44 period to ensure diagnostic accuracy. The repeat measure design  
45 of the study also allowed us to control for demographics, and motor  
46 and non-motor symptomatology. The limitations of the study are  
47 that the PD cohort had a mix of prevalent and incident cases, thus  
48 possibly over estimating the possible causal associations with  
49 mortality. However, controlling for prevalent and incident cases in  
50 our analysis did not reveal any between group significant  
51 differences. In light of our findings we feel that the current methods  
52 of capturing the cause of death significantly underestimate the true  
53 population burden of PD. The under reporting of dementia as an  
54 underlying cause of death in this cohort in addition to PD, also  
55 suggests that the interpretation of and quality of mortality data  
56 currently is not a valid or reliable source of data. Furthermore we  
57  
58  
59  
60

1  
2  
3 would admonish the use of mortality statistics alone to plan for  
4 future service provision in this patient population.  
5  
6  
7

8 **Contributorship statement:** PH and RJM conceived and designed  
9 the study, collected the data, and managed the database. PH  
10 managed the database, contributed to data cleaning, performed the  
11 statistical analyses. PH and RJM contributed to interpretation of the  
12 data. PH and RJM wrote the manuscript. All authors critically  
13 reviewed the manuscript and approved the final version to be  
14 published.  
15

16 **Competing interests:** None declared.  
17

18 **Funding:** This research received no specific grant from any funding  
19 agency in the public, commercial or not-for-profit sectors.  
20

21 **Data sharing statement:** No additional data available.  
22  
23  
24  
25  
26  
27  
28  
29  
30  
31  
32  
33  
34  
35  
36  
37  
38  
39  
40  
41  
42  
43  
44  
45  
46  
47  
48  
49  
50  
51  
52  
53  
54  
55  
56  
57  
58  
59  
60

## References

1. Devis T, Rooney C. Death certification and the epidemiologist. *Health Statistics Quarterly* 1999;**1**: 21–33.
2. Hanzlick R. Cause of Death and the Death Certificate: Important Information for Physicians, Coroners, Medical Examiners, and the Public. Northfield, IL: College of American Pathologists; 2006.
3. World Health Organisation. International Classification of Diseases and Related health problems. Geneva: WHO; 1992. Tenth Revision.
4. Rooney C, Smith S. Implementation of ICD-10 for mortality data in England and Wales from January 2001. *Health Statistics Quarterly* 2000;**8**:41–50.
5. Rooney C, Griffiths C, Cook L. Implementation of ICD-10 for cause of death coding – some preliminary results from the bridge coding stud. *Health Statistics Quarterly* 2002;**13**:31–41.
6. Neilsen GP, Björnsson J, Jonasson JG. The accuracy of death certificates. Implications for health statistics. *Virchows Arch A Pathol Anat Histopathol* 1991;**419**:143–6.
7. Sington JD, Cottrell BJ. Analysis of the sensitivity of death certificates in 440 hospital deaths: a comparison with necropsy findings. *J Clin Pathol* 2002;**55**:499–502.
8. Nashelesky MB, Lawrence CH. Accuracy of cause of death determination without forensic autopsy examination. *Am J Forensic Med Pathol* 2003;**24**:313–9.
9. Smith Sehdev AE, Hutchins GM. Problems with proper completion and accuracy of the cause-of-death statement. *Arch Intern Med* 2001;**161**:277–84.
10. Shibuya K, Scheele S, Boerma T. Health statistics: time to get serious. *Bull World Health Organ* 2005;**83**:722.
11. Cambridge B, Cina SJ. The accuracy of death certificate completion in a suburban community. *Am J Forensic Med Pathol* 2010;**31**:232–5.
12. Lu TH, Anderson RN, Kawachi I. Trends in frequency of reporting improper diabetes-related cause-of-death statements on death certificates, 1985–2005: An algorithm to identify incorrect causal sequences. *Am J Epidemiol* 2010;**171**:1069–78.
13. Drummond, MB, Wise, RA, John, M, *et al*. Accuracy of Death Certificates in COPD: Analysis from the TORCH Trial. *COPD: Journal of Chronic Obstructive Pulmonary Disease* 2010;**7**:179–185.
14. Rampatige R, Mikkelsen L, Hernandez B, *et al*. Systematic review of statistics on causes of deaths in hospitals: strengthening the evidence for policy-makers. *Bull World Health Organ* 2014;**92**:807–16.
15. World Health Organization. World Report on Ageing and Health 2015. Geneva: WHO.
16. Hoehn M, Yahr, MD. Parkinsonism: Onset, Progression, and mortality. *Neurology* 1967;**17**:427–442.
17. Diamond SG, Markham CH, Treciokas LJ. Long-term experience with L-dopa: efficacy, progression, and mortality.

- In: Birkmayer W, Hornykiewicz O, eds. Advances in parkinsonism. Basel: Editiones Roche, 1976:444-445.
18. Hoehn MM. Parkinsonism treated with levodopa: progression and mortality. *J Neurol Transmission* 1983;**s19**:253-64.
  19. Di Rocco A, Molinari SP, Kollmeier B, *et al.* Parkinson's disease: progression and mortality in the l-dopa era. *Adv Neurol* 1996;**69**:3-11
  20. Hely MA, Morris JGL, Traficante R, *et al.* The Sydney multicentre study of Parkinson's disease: progression and mortality at 10 years. *J Neurol Neurosurg Psychiatry* 1999;**67**: 300–7.
  21. Driver JA, Kurth T, Buring JE, *et al.* Parkinson's disease and risk of mortality. **Neurology** 2008;**70**:1423-30.
  22. Fall PA, Saleh A, Fredrickson M, *et al.* Survival time, mortality, and cause of death in elderly patients with Parkinson's disease: a 9-year follow-up. *Mov Disord* 2003;**18**: 1312-16.
  23. Herlofson K, Atle Lie S, Aarsland D, *et al.* Mortality and Parkinson's disease: A community based study. *Neurology* 2004;**62**:937-42.
  24. Ishihara LS, Cheesbrough A, Brayne C, *et al.* Estimated life expectancy of Parkinson's patients compared with the UK population. *J Neurol Neurosurg Psychiatry* 2007;**78**:1304-9.
  25. Hobson JP, Meara RJ. Survival and the estimated life expectancy in a community based cohort of Parkinson's disease patients with and without dementia compared to the general population of the United Kingdom. *J Neurol Neurosurg Psychiatry* 2010;**81**:1093-8.
  26. Pennington S1, Snell K, Lee M, *et al.* The cause of death in idiopathic Parkinson's disease. *Parkinsonism Relat Disord* 2010;**16**:434-7.
  27. Williams-Gray CH, Mason SL, Evans JR, *et al.* The CamPaIGN study of Parkinson's disease: 10-year outlook in an incident population-based cohort. *J Neurol Neurosurg Psychiatry* 2013;**84**:1258–64.
  28. Pinter B, Diem-Zangerl A, Wenning GK, *et al.* Mortality in Parkinson's disease: a 38-year follow-up study. *Mov Disord* 2015;**30**:266-9.
  29. Hobson P, Islam W, Roberts S, *et al.* The risk of bladder and autonomic dysfunction in a community cohort of Parkinson's disease patients and normal controls. *Parkinsonism Relat Disord* 2003;**10**:67-71.
  30. Hely MA, Morris J.G.L, Reid WGJ, *et al.* Sydney Multicenter Study of Parkinson's disease: Non-L-Dopa-Responsive Problems Dominate at 15 years. *Mov Disord* 2005;**20**:190-9.
  31. Weerkamp NJ1, Tissingh G, Poels PJ, *et al.* Nonmotor symptoms in nursing home residents with Parkinson's disease: prevalence and effect on quality of life. *J Am Geriatr Soc* 2013;**61**:1714-21.
  32. Storch A, Schneider CB, Wolz M, *et al.* Nonmotor fluctuations in Parkinson disease: severity and correlation with motor complications. *Neurology* 2013;**80**:800–9.
  33. Marras C, Chaudhuri KR. Nonmotor features of Parkinson's disease subtypes. *Mov Disord* 2016;**31**:1095–02.

- 1
- 2
- 3 34. Anthony HV, Schapira AHV, Chaudhuri KR, *et al.* Non-
- 4 motor features of Parkinson disease. *Nature Reviews*
- 5 *Neuroscience* 2017;**18**:435–50.
- 6 35. Aarsland D, Andersen K, Larsen JP, *et al.* Risk of Dementia
- 7 in Parkinson's disease. A community-based, prospective
- 8 study. *Neurology* 2001;**56**: 730-6.
- 9 36. Foltynie T, Brayne CE, Robbins TW, *et al.* The cognitive
- 10 ability of an incident cohort of Parkinson's patients in the
- 11 UK. The CamPaIGN study. *Brain* 2004;**127**:550–60.
- 12 37. Hobson JP, Meara RJ. The risk and incidence of dementia
- 13 in a cohort of older subjects with Parkinson's disease in the
- 14 UK. *Mov Disord* 2004;**19**:1043-49.
- 15 38. Hely MA, Reid WGJ, Adena MA, *et al.* The Sydney
- 16 Multicentre Study of Parkinson's disease: The Inevitability of
- 17 Dementia at 20 years. *Mov Disord* 2008;**26**:837-44.
- 18 39. Williams-Gray CH, Evans JR, *et al.* The distinct cognitive
- 19 syndromes of Parkinson's disease: 5 year follow-up of the
- 20 CamPaIGN cohort. *Brain* 2009;**132**:2958–69.
- 21 40. Williams-Gray CH, Foltynie T, Brayne CE, *et al.* Evolution
- 22 of cognitive dysfunction in an incident Parkinson's disease
- 23 cohort. *Brain* 2007;**130**:1787–98.
- 24 41. Nussbaum M, Treves R, Inzelberg JM, *et al.* Survival in
- 25 Parkinson's disease: the effect of dementia. *Parkinsonism*
- 26 *Relat Disord* 1998;**4**:179-81.
- 27 42. Levy G, Tang M-X, Louis ED, *et al.* The association of
- 28 incident dementia with mortality in PD. *Neurology*
- 29 2002;**59**:1708-13.
- 30 43. Hughes TA, Ross HF, Mindman RHS, *et al.* Mortality in
- 31 Parkinson's disease and its association with dementia and
- 32 depression. *Acta Neurol Scand* 2004;**110**:118-123.
- 33 44. de Lau LM, Schipper MA, Hofman A, Koudstaal PJ, Bretler
- 34 MMB. Prognosis of Parkinson's disease: Risk of Dementia
- 35 and Mortality: The Rotterdam study. *Arc Neurol*
- 36 2005;**62**:1265-69.
- 37 45. Buter TC, van den Hout A, Matthews FE, *et al.* Dementia
- 38 and survival in Parkinson's disease: A 12-year population
- 39 study. *Neurology* 2008;**70**:1017-22.
- 40 46. Paulson GW, Gill WM. Are death certificates reliable to
- 41 estimate the incidence of Parkinson's disease? *Mov Disord*
- 42 1995;**53**:587-8.
- 43 47. Phillips NJ, Reay J, Martyn CN. Validity of mortality data for
- 44 Parkinson's disease. *J Epidemiol Community Health*
- 45 1999;**53**:587-88.
- 46 48. Pressley JC, Tang MX, Marder K, *et al.* Disparities in the
- 47 recording of Parkinson's disease on death certificates. *Mov*
- 48 *Disord* 2005;**20**(3): 315–321.
- 49 49. Benito-León J, Louis ED, Villarejo-Galende A, *et al.* Under-
- 50 reporting of Parkinson's disease on death certificates: A
- 51 population-based study (NEDICES). *Journal of the*
- 52 *Neurological Sciences* 2014;**347**:188-92.
- 53 50. Donnan PT, Steinke DT, Stubbings C, *et al.* Selegiline and
- 54 mortality in subjects with Parkinson's disease: A longitudinal
- 55 community study. *Neurology* 2000;**55**,1785-9.
- 56
- 57
- 58
- 59
- 60



- 1
- 2
- 3 51. Marras C, McDermott, Rochon PA, *et al.* Survival in
- 4 Parkinson disease; Thirteen-year follow-up of the
- 5 DATATOP cohort. *Neurology* 2005;**64**:87-93.
- 6 52. Chen H, Zhang SM, Schwarzschild MA, *et al.* Survival of
- 7 Parkinson's Disease in a Large Prospective cohort of male
- 8 Health Professionals. *Mov Disord* 2006;**27**:1002-7.
- 9 53. Meara RJ, Bhowmick BK, Hobson JP. Accuracy of
- 10 diagnosis in patients with presumed Parkinson's disease in
- 11 a community based disease register. *Age Ageing* 1999;**28**:
- 12 99-02.
- 13 54. Gibb WRG, Lees AJ. The relevance of the Lewy body to the
- 14 pathogenesis of idiopathic Parkinson's disease. *J Neurol*
- 15 *Neurosurg Psychiatry* 1998;**51**:745-52.
- 16 55. Fahn S, Elton RL, and Members of the UPDRS
- 17 Development Committee. Unified Parkinson's Disease
- 18 Rating Scale. In: Fahn S, Marsden CD, Calne DB, Goldstein
- 19 M eds. Recent developments in Parkinson's disease,
- 20 Volume 2. Florham Park, NJ: Macmillan Health Care
- 21 Information, 1987:153–64.
- 22 56. Sheikh JI, Yesavage JA. Geriatric Depression Scale (GDS).
- 23 Recent evidence and development of a shorter
- 24 version. in: T.L. Brink (Ed.) *Clinical gerontology: A guide to*
- 25 *assessment and intervention*. The Haworth Press, Inc., New
- 26 *York*; 1986:165–73.
- 27 57. Roth M, Tym E, Mountjoy CQ, Huppert FA, *et al.* CAMDEX.
- 28 A standardised instrument for the diagnosis of mental
- 29 disorder in the elderly with special reference to the early
- 30 detection of dementia. *Br J Psychiatry* 1986;**149**:698-09.
- 31 58. Hobson JP, Edwards N, Meara RJ. The Parkinson's
- 32 Disease Activities of Daily Living scale: A new simple and
- 33 brief subjective measure of disability in Parkinson's disease.
- 34 *Clin Rehabil* 2001;**15**:241-46
- 35 59. Williams, A. EuroQol - A new facility for the measurement of
- 36 health-related quality of life. *Health Policy* 1990;**16**:199-
- 37 208.
- 38 60. American Psychiatric Association. (2000). Diagnostic and
- 39 statistical manual of mental disorders (4th ed., text rev.).
- 40 Washington, DC: Author.
- 41 61. IBM Corp. Released 2010. IBM SPSS Statistics for
- 42 Windows, Version 19.0. Armonk, NY: IBM Corp.
- 43 62. Altman DG (1991) Practical statistics for medical research.
- 44 London: Chapman and Hall.
- 45 63. MedCalc for Windows, version 15.0 (MedCalc Software,
- 46 Ostend, Belgium)
- 47 64. Duarte J, García Olmos LM, Mendoza A, *et al.* The natural
- 48 history of Parkinson's disease in the province of Segovia:
- 49 mortality in a longitudinal study (20-year follow-up). *Acta*
- 50 *Neurol Scand* 2013;**127**:295-300.
- 51 65. D'Amelio M, Ragonese , Morganette L, *et al.* Long-term
- 52 survival of Parkinson's disease. A population-based study. *J*
- 53 *Neurol* 2006;**253**:33-7.
- 54 66. Estenne M, Hubert M, De Troyer A. Respiratory-muscle
- 55 involvement in Parkinson's disease. *N Engl J Med*
- 56 1984;**311**:1516–17.
- 57
- 58
- 59
- 60



- 1
- 2
- 3 67. Sabate M, Gonzalez I, Ruperez F, *et al.* Obstructive and
- 4 restrictive pulmonary dysfunctions in Parkinson's disease. *J*
- 5 *Neurol Sci* 1996;**138**:114–119.
- 6 68. Wang Y, Shao W-b, Gao L, *et al.* Abnormal Pulmonary
- 7 Function and Respiratory Muscle Strength Findings in
- 8 Chinese Patients with Parkinson's Disease and Multiple
- 9 System Atrophy—Comparison with Normal Elderly. *PLoS*
- 10 *ONE* 2014;**9**:e116123:doi:10.1371/journal.pone.0116123.
- 11 69. Hobson JP, Meara RJ. The Denbighshire cohort risk and
- 12 incidence of Mild Cognitive Impairment and its progression
- 13 to Parkinson's disease dementia at 16-years. *Int J Geriatr*
- 14 *Psychiatr* 2015;**30**:1048-55.
- 15 70. Romero JP, Benito-Leon J, Mitchell AJ, *et al.* Under
- 16 reporting of dementia deaths on death certificates using
- 17 data from a population-based study (NEDICES). *J*
- 18 *Alzheimers Dis* 2014;**39**:741-8.
- 19 71. Sleeman KE, Ho YK, Verne J, *et al.* Reversal of English
- 20 trend towards hospital death in dementia: a population-
- 21 based study of place of death and associated individual and
- 22 regional factors, 2001–2010. *BMC Neurology* 2014;**14**:
- 23 doi:10.1186/1471-2377-14-59.
- 24 72. Perera G, Stewart R, Higginson IJ, *et al.* Reporting of
- 25 clinically diagnosed dementia on death certificates:
- 26 retrospective cohort study. *Age Ageing* 2016;**45**: 668-73.
- 27 73. Garcia-Ptacek S, Kåreholt I, Cermakova P, *et al.* Causes of
- 28 Death According to Death Certificates in Individuals with
- 29 Dementia: A Cohort from the Swedish Dementia Registry. *J*
- 30 *Am Geriatr Soc.* 2016; **64**: e137-142:doi:10.1111/jgs.14421.
- 31 74. Moens K, Houttekier D, Van den Block L, *et al.* Place of
- 32 death of people living with Parkinson's disease: a
- 33 population-level study in 11 countries. *BMC Palliat*
- 34 *Care* 2015;**14**:28:doi:10.1186/s12904-015-0021-3.
- 35 75. Bajaj A, Driver JA, Schernhammer ES. Parkinson's disease
- 36 and cancer risk: a systematic review and meta-analysis.
- 37 *Cancer Causes Control* 2010;**21**:697-07.
- 38 76. Abou-Sleiman PM, Muqit MM, Wood NW. Expanding
- 39 insights of mitochondrial dysfunction in Parkinson's disease.
- 40 *Nat Rev Neurosci* 2006;**7**:207-19.
- 41 77. Dawson TM, Dawson VL. The role of parkin in familial and
- 42 sporadic Parkinson's disease. *Mov Disord* 2010;**25**:S32-9.
- 43 78. Sorensen SA, Fenger K. Causes of death in patients with
- 44 Huntington's disease and in unaffected first degree
- 45 relatives. *J Med Genet* 1992;**29**:911–14.
- 46 79. Romero JP, Benito-León J, Louis ED, *et al.* Alzheimer's
- 47 disease is associated with decreased risk of cancer-specific
- 48 mortality: a prospective study (NEDICES). *J Alzheimers*
- 49 *Dis* 2014;**40**:465-73.
- 50 80. Driver JA, Beiser A, Au R, *et al.* Inverse association
- 51 between cancer and Alzheimer's disease: results from the
- 52 Framingham Heart Study *BMJ* 2012;**344**:
- 53 e1442:doi.org/10.1136/bmj.e1442.
- 54 81. Benito-León J, Romero JP, Louis ED, *et al.* Faster cognitive
- 55 decline in elders without dementia and decreased risk of
- 56 cancer mortality. *Neurology* 2014;**82**:1441–1448.
- 57
- 58
- 59
- 60

- 1  
2  
3 82. Goetz CG, Lütge W, Tanner CM. Autonomic dysfunction in  
4 Parkinson's disease. *Neurology* 1986;**36**:73-5.  
5 83. Stubendorff K, Aarsland D, Minthon L, *et al*. The Impact of  
6 Autonomic Dysfunction on Survival in Patients with  
7 Dementia with Lewy Bodies and Parkinson's Disease with  
8 Dementia. *PLoS One*. 2012;**7**:  
9 e45451.doi:10.1371/journal.pone.0045451  
10 84. Xin W, Lin Z, Mi S. Orthostatic hypotension and mortality  
11 risk: a meta-analysis of cohort studies. *Heart* 2014;**100**:406-  
12 13.  
13  
14  
15  
16  
17  
18  
19  
20  
21  
22  
23  
24  
25  
26  
27  
28  
29  
30  
31  
32  
33  
34  
35  
36  
37  
38  
39  
40  
41  
42  
43  
44  
45  
46  
47  
48  
49  
50  
51  
52  
53  
54  
55  
56  
57  
58  
59  
60

For peer review only

Table 1:  
Demographic and clinical outcomes of the PD and control cohorts

|                              | Parkinson's disease | Control     | <i>p</i> < 0.05 |
|------------------------------|---------------------|-------------|-----------------|
| Gender (female %)            | 44%                 | 41%         | NS              |
| Age at death                 | 80.7 (7.1)          | 81.9 (6.3)  | NS              |
| Institutional care %         | 52%                 | 30%         | 0.003           |
| Place of death<br>(Hospital) | 37%                 | 74%         | 0.002           |
| EQ-5D (Weighted health)      | 0.58 (0.36)         | 0.79 (0.28) | 0.001           |
| EQ-5D (VAS %)                | 55 (16.5)           | 77 (17.6)   | 0.001           |
| Onset of PD                  | 67.3(10.7)          | -----       | -----           |
| Duration of PD               | 13.2 (8.8)          | -----       | -----           |
| UPDRS (motor section)        | 27.9(11.7)          | -----       | -----           |
| H & Y                        | 2.9 (0.74)          | -----       | -----           |
| PADL                         | 3.1 (1.1)           | -----       | -----           |

Figure 1.  
Kaplan-Meier survival curves for all cause mortality in the PD and control cohorts

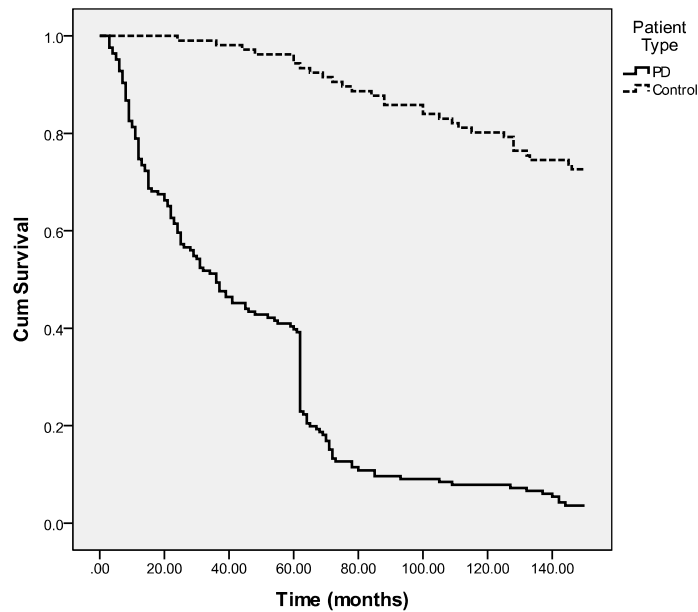

Figure 2: Survival curve analysis comparison between prevalent (n=76) and incident (n=80) PD cases.

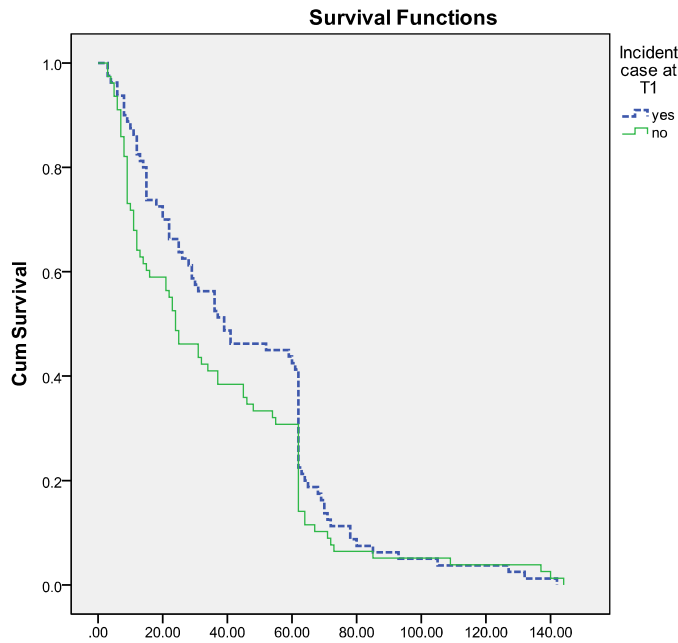

Figure 3: Primary cause of death reported for the PD cohort.

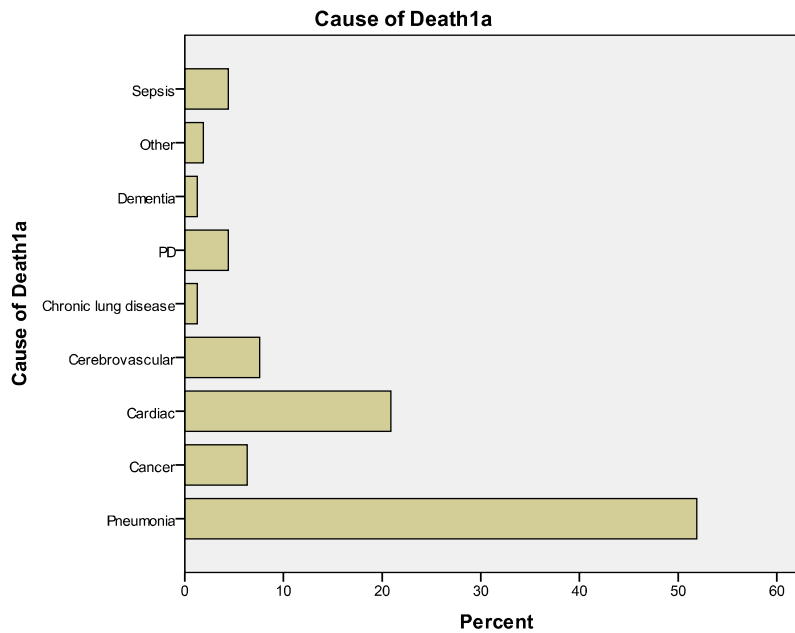

Figure 4: Primary cause of death reported for the control cohort.

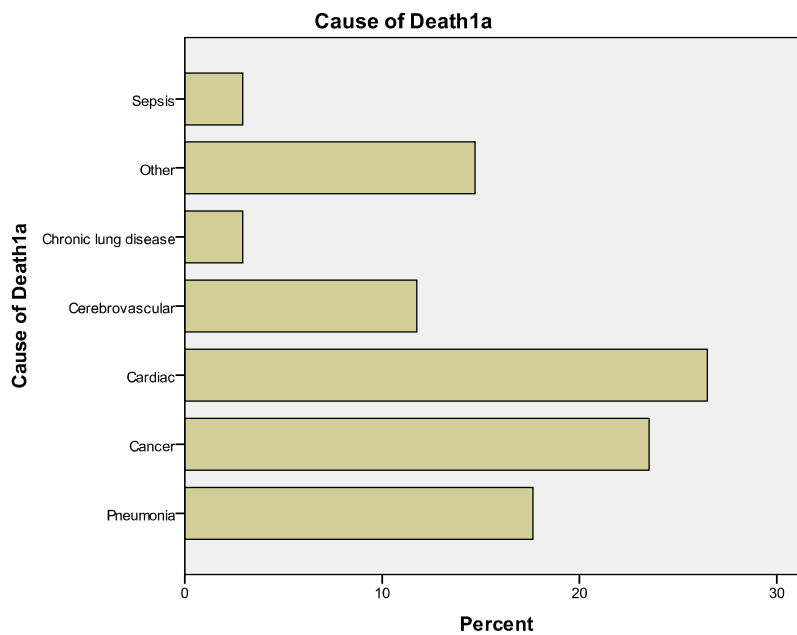

er review only

**STROBE 2007 (v4) checklist of items to be included in reports of observational studies in epidemiology\***  
**Checklist for cohort, case-control, and cross-sectional studies (combined)**

| Section/Topic             | Item # | Recommendation                                                                                                                                                                                                                                                                                                                                                                                                                                                         | Reported on page # |
|---------------------------|--------|------------------------------------------------------------------------------------------------------------------------------------------------------------------------------------------------------------------------------------------------------------------------------------------------------------------------------------------------------------------------------------------------------------------------------------------------------------------------|--------------------|
| Title and abstract        | 1      | (a) Indicate the study’s design with a commonly used term in the title or the abstract                                                                                                                                                                                                                                                                                                                                                                                 | 1                  |
|                           |        | (b) Provide in the abstract an informative and balanced summary of what was done and what was found                                                                                                                                                                                                                                                                                                                                                                    | 2                  |
| <b>Introduction</b>       |        |                                                                                                                                                                                                                                                                                                                                                                                                                                                                        |                    |
| Background/rationale      | 2      | Explain the scientific background and rationale for the investigation being reported                                                                                                                                                                                                                                                                                                                                                                                   | 3                  |
| Objectives                | 3      | State specific objectives, including any pre-specified hypotheses                                                                                                                                                                                                                                                                                                                                                                                                      | 3,4                |
| <b>Methods</b>            |        |                                                                                                                                                                                                                                                                                                                                                                                                                                                                        |                    |
| Study design              | 4      | Present key elements of study design early in the paper                                                                                                                                                                                                                                                                                                                                                                                                                | 4                  |
| Setting                   | 5      | Describe the setting, locations, and relevant dates, including periods of recruitment, exposure, follow-up, and data collection                                                                                                                                                                                                                                                                                                                                        | 4                  |
| Participants              | 6      | (a) <i>Cohort study</i> —Give the eligibility criteria, and the sources and methods of selection of participants. Describe methods of follow-up<br><i>Case-control study</i> —Give the eligibility criteria, and the sources and methods of case ascertainment and control selection. Give the rationale for the choice of cases and controls<br><i>Cross-sectional study</i> —Give the eligibility criteria, and the sources and methods of selection of participants | 4                  |
|                           |        | (b) <i>Cohort study</i> —For matched studies, give matching criteria and number of exposed and unexposed<br><i>Case-control study</i> —For matched studies, give matching criteria and the number of controls per case                                                                                                                                                                                                                                                 | 4                  |
| Variables                 | 7      | Clearly define all outcomes, exposures, predictors, potential confounders, and effect modifiers. Give diagnostic criteria, if applicable                                                                                                                                                                                                                                                                                                                               | 4                  |
| Data sources/ measurement | 8*     | For each variable of interest, give sources of data and details of methods of assessment (measurement). Describe comparability of assessment methods if there is more than one group                                                                                                                                                                                                                                                                                   | 4,5                |
| Bias                      | 9      | Describe any efforts to address potential sources of bias                                                                                                                                                                                                                                                                                                                                                                                                              | 5,6,8              |
| Study size                | 10     | Explain how the study size was arrived at                                                                                                                                                                                                                                                                                                                                                                                                                              | n/a                |
| Quantitative variables    | 11     | Explain how quantitative variables were handled in the analyses. If applicable, describe which groupings were chosen and why                                                                                                                                                                                                                                                                                                                                           | n/a                |
| Statistical methods       | 12     | (a) Describe all statistical methods, including those used to control for confounding                                                                                                                                                                                                                                                                                                                                                                                  | 5                  |
|                           |        | (b) Describe any methods used to examine subgroups and interactions                                                                                                                                                                                                                                                                                                                                                                                                    | 5                  |
|                           |        | (c) Explain how missing data were addressed                                                                                                                                                                                                                                                                                                                                                                                                                            | n/a                |
|                           |        | (d) <i>Cohort study</i> —If applicable, explain how loss to follow-up was addressed<br><i>Case-control study</i> —If applicable, explain how matching of cases and controls was addressed                                                                                                                                                                                                                                                                              | n/a                |

|                          |     |                                                                                                                                                                                                              |     |
|--------------------------|-----|--------------------------------------------------------------------------------------------------------------------------------------------------------------------------------------------------------------|-----|
|                          |     | <i>Cross-sectional study</i> —If applicable, describe analytical methods taking account of sampling strategy                                                                                                 |     |
|                          |     | (e) Describe any sensitivity analyses                                                                                                                                                                        | n/a |
| <b>Results</b>           |     |                                                                                                                                                                                                              |     |
| Participants             | 13* | (a) Report numbers of individuals at each stage of study—eg numbers potentially eligible, examined for eligibility, confirmed eligible, included in the study, completing follow-up, and analysed            | 5   |
|                          |     | (b) Give reasons for non-participation at each stage                                                                                                                                                         | n/a |
|                          |     | (c) Consider use of a flow diagram                                                                                                                                                                           | --  |
| Descriptive data         | 14* | (a) Give characteristics of study participants (eg demographic, clinical, social) and information on exposures and potential confounders                                                                     | 5   |
|                          |     | (b) Indicate number of participants with missing data for each variable of interest                                                                                                                          | n/a |
|                          |     | (c) <i>Cohort study</i> —Summarise follow-up time (eg, average and total amount)                                                                                                                             | 5,6 |
| Outcome data             | 15* | <i>Cohort study</i> —Report numbers of outcome events or summary measures over time                                                                                                                          | 5,6 |
|                          |     | <i>Case-control study</i> —Report numbers in each exposure category, or summary measures of exposure                                                                                                         | 5,6 |
|                          |     | <i>Cross-sectional study</i> —Report numbers of outcome events or summary measures                                                                                                                           | --  |
| Main results             | 16  | (a) Give unadjusted estimates and, if applicable, confounder-adjusted estimates and their precision (eg, 95% confidence interval). Make clear which confounders were adjusted for and why they were included | 5,6 |
|                          |     | (b) Report category boundaries when continuous variables were categorized                                                                                                                                    | 5,6 |
|                          |     | (c) If relevant, consider translating estimates of relative risk into absolute risk for a meaningful time period                                                                                             | 5,6 |
| Other analyses           | 17  | Report other analyses done—eg analyses of subgroups and interactions, and sensitivity analyses                                                                                                               | 5,6 |
| <b>Discussion</b>        |     |                                                                                                                                                                                                              |     |
| Key results              | 18  | Summarise key results with reference to study objectives                                                                                                                                                     | 6   |
| Limitations              | 19  | Discuss limitations of the study, taking into account sources of potential bias or imprecision. Discuss both direction and magnitude of any potential bias                                                   | 8   |
| Interpretation           | 20  | Give a cautious overall interpretation of results considering objectives, limitations, multiplicity of analyses, results from similar studies, and other relevant evidence                                   | 8   |
| Generalisability         | 21  | Discuss the generalisability (external validity) of the study results                                                                                                                                        | 6-8 |
| <b>Other information</b> |     |                                                                                                                                                                                                              |     |
| Funding                  | 22  | Give the source of funding and the role of the funders for the present study and, if applicable, for the original study on which the present article is based                                                | 9   |

\*Give information separately for cases and controls in case-control studies and, if applicable, for exposed and unexposed groups in cohort and cross-sectional studies.

**Note:** An Explanation and Elaboration article discusses each checklist item and gives methodological background and published examples of transparent reporting. The STROBE checklist is best used in conjunction with this article (freely available on the Web sites of PLoS Medicine at <http://www.plosmedicine.org/>, Annals of Internal Medicine at <http://www.annals.org/>, and Epidemiology at <http://www.epidem.com/>). Information on the STROBE Initiative is available at [www.strobe-statement.org](http://www.strobe-statement.org).



# BMJ Open

## **Mortality and the quality of death certification in cohort of Parkinson's disease and matched controls in North Wales United Kingdom at 18-years: a community based cohort study.**

|                                 |                                                                                       |
|---------------------------------|---------------------------------------------------------------------------------------|
| Journal:                        | <i>BMJ Open</i>                                                                       |
| Manuscript ID                   | bmjopen-2017-018969.R1                                                                |
| Article Type:                   | Research                                                                              |
| Date Submitted by the Author:   | 23-Sep-2017                                                                           |
| Complete List of Authors:       | Hobson, Peter; Academic Unit<br>Meara, Jolyon; Academic Unit                          |
| <b>Primary Subject Heading</b>: | Neurology                                                                             |
| Secondary Subject Heading:      | Epidemiology                                                                          |
| Keywords:                       | Parkinson-s disease < NEUROLOGY, Mortality, Death certification, Dementia < NEUROLOGY |
|                                 |                                                                                       |

SCHOLARONE™  
Manuscripts

1  
2  
3 Mortality and the quality of death certification in cohort of  
4 Parkinson's disease and matched controls in North Wales United  
5 Kingdom at 18-years: a community based cohort study.  
6

7  
8 Peter Hobson<sup>1</sup>, Jolyon Meara<sup>1</sup>  
9

10 <sup>1</sup>Academic Unit,  
11 Betsi Cadwaladr University Health Board,  
12 Glan Clwyd Hospital,  
13 Rhyl, United Kingdom  
14

15 Correspondence to:  
16 Dr Peter Hobson; peter.hobson@wales.nhs.uk  
17

18 Academic Unit,  
19 Betsi Cadwaladr University Health Board  
20 Glan Clwyd Hospital,  
21 Sarn Lane,  
22 Bodelwyddan,  
23 LL18 5UJ, United Kingdom  
24 Ph: +44 1745 448788  
25

26 Keywords:  
27 Parkinson's disease, Mortality, Death certification, Dementia  
28

29 Word count: 3213  
30  
31  
32  
33  
34  
35  
36  
37  
38  
39  
40  
41  
42  
43  
44  
45  
46  
47  
48  
49  
50  
51  
52  
53  
54  
55  
56  
57  
58  
59  
60

## Abstract

**Objective:** To estimate the survival, mortality and quality of death certification in a community cohort of Parkinson's disease (PD) patients and controls in North Wales United Kingdom (UK).

**Setting and participants:** A total of 166 PD patients and 102 controls were included in this investigation. Hospital and primary care records were employed to ascertain the number of individuals who died during the investigation period. The primary and underlying cause of death was extracted from certificates obtained from the UK General Register Office.

**Results:** There were 158 (95%) deaths in the PD and 34 (33%) deaths recorded in the control cohort. The Standard Mortality Rate (SMR) was 1.82 (95% CI: 1.55 – 2.13). The main cause of death reported in the PD cohort was pneumonia (53%), followed by cardiac related deaths (21%). PD as the primary or underlying cause was not reported in 75/158 (47%) of the cohort. In addition, although 144 of the cohort had a diagnosis of dementia, this was reported in less than 10% (n=14) of their death certificates.

**Conclusion:** This community based investigation established that PD is associated with a higher risk of mortality compared to the general population. In addition, we found that the majority of patients with PD if they survive long enough will develop dementia. However, the reporting of PD and dementia as a cause or underlying cause of death on certificates was found to be suboptimal. The results from this investigation suggest that use of mortality statistics derived from death certification alone in epidemiological studies, healthcare planning and provision need to be reconsidered, because they are not a valid or reliable source of data capture.

## Strengths and limitations

- Community based longitudinal follow-up cohort design.
- All patients fulfilled diagnostic criteria for Parkinson's disease and or dementia.
- Baseline and subsequent repeat measure data capture allowed analysis for predictive outcomes.
- The cohort included prevalent and new cases Parkinson's disease. Although the varying disease duration of the Parkinson's disease cohort is a possible source of bias, we found no differences between the two groups survival.
- The control cohort included subjects without known neurological condition and thus may have intruded bias in the outcome comparisons with the Parkinson's disease patients.

## Introduction

Data drawn from death certificates is often employed by epidemiological, public health and research scientists to capture the incidence, prevalence and mortality in populations. In addition, these statistics are often utilized in the evaluation of public health interventions, setting priorities for medical research and health services, the planning of health services, and the clinical assessment of the effectiveness of those services. [1-3] The introduction of the revised International Classification of Diseases (ICD) system in 2001 aim was to improve the accuracy in the reported cause of death, where underlying conditions, mentioned in Part 1 or 2 of death certification take priority over others. [4,5] The underlying principle for this is that reporting of multiple causes of death should provide a better description of a particular disease or condition, allowing for more effective and meaningful data capture. The reliability of statistical information extracted from death certificates however still remains uncertain, where for example, rather than the underlying chronic condition being reported, a secondary cause of death is often reported as the main cause of death. [6-14]

Increasing elderly population demographic changes worldwide along with exponential rises in chronic conditions, will most likely place greater social and fiscal demands on existing clinical health and social services. [15] To ensure that mortality and survival rates are more precisely captured for these chronic conditions, the relative contributions different diseases have upon survival and mortality need to be more accurately measured. The challenge is to ensure that more reliable data are recorded to allow for more efficient planning for healthcare services and clinical interventions. Parkinson's disease (PD) is a progressive neurodegenerative disease strongly associated with increased mortality and lower life expectancy than the general population. [16] In addition to the motor symptoms of PD, many patients often live with a significant number of other non-motor conditions which contribute to the symptomatology of the disease. [17-22] In particular, dementia occurs frequently in the elderly PD patient and has been shown to be a strong predictor for increased mortality. [23-33] This most probably has implications for the quality of death certification, which in previous investigations has been found to be inconsistent, under recorded or an inaccurate record of the cause of death in patients. [16,34-37] The methodological design of previous investigations, where cohorts have been drawn from clinical populations or pharmaceutical trails alone may partially explain the variability between studies.[39-40] Only a small number of investigations have employed prospective community study methods to ascertain the utility of death certification in PD, and furthermore few have included a comparison control group.

This investigation is a report of the outcomes from a community cohort of PD patient and controls (without neurological disease) who have been regularly followed over the past 18 years in the county of Denbighshire in the United Kingdom. It aims firstly to examine the reported cause and quality of death certification in

1  
2  
3 these cohorts. Secondly, it will explore if PD and or dementia are  
4 reported as a cause or underlying cause of death on certificates.  
5 Thirdly, the demographic, motor and non-motor symptoms of PD  
6 will be explored to establish if they are associated or predictive with  
7 an increased risk of mortality.

## 8 **Methods**

### 9 **Subjects**

10  
11  
12 The patient and control recruitment methodology has been  
13 described in greater depth in previous reports [25,41]. In brief,  
14 between December 1994 and January 1997, employing multiple  
15 sources of ascertainment we recruited newly diagnosed PD  
16 patients and patients with an existing diagnosis of probable PD  
17 based upon the UKPDS brain bank criteria. [42] General  
18 practitioner (GP) records (n=74) in a defined Area of North Wales  
19 (Denbighshire), were employed to identify individuals in receipt of a  
20 defined group of anti-parkinsonian drugs, which included  
21 Levodopa, monomine-oxidase-B inhibitors, dopamine agonists and  
22 anti-muscarinic drugs. Additionally, hospital records were examined  
23 and patients who were not on active but known to medical services  
24 were also ascertained. In total, 402 patients were identified, of  
25 whom 213 fulfilled criteria for clinically probable PD patients (n=  
26 213). Of the original PD cohort, 25 died before they could be  
27 consented into the investigation, 13 withdrew consent and the  
28 remaining patients (n = 9) were lost to follow-up. This left at study  
29 entry 166 probable PD patients for follow-up from December 1997  
30 to January 2015.

31  
32  
33 The control cohort was randomly drawn from two GP practices  
34 within the same geographical area of the PD cohort within the  
35 same time frame. The controls were matched for sex and age to  
36 PD patients ( $\pm$  3 years), were not known to have a diagnosis of  
37 clinically probable PD, parkinsonism, Alzheimer's or other  
38 dementia, stroke, neurological disorder, not in receipt of  
39 psychoactive drugs and did not have a known psychiatric, alcohol  
40 or substance abuse history. A total of 164 controls were invited to  
41 participate in the study, of whom 42 subsequently declined to  
42 participate and a further six withdrew consent at a later date. Upon  
43 initial baseline screening, eight were found to have previously  
44 suffered from a stroke, two had signs of parkinsonism and four  
45 fulfilled criteria for dementia and were excluded from further  
46 analysis, leaving a cohort of 102 control subjects.

### 47 **Clinical assessment.**

48  
49 The PD cohort demographic variables were recorded which  
50 included age, gender, educational attainment, social class, age of  
51 PD diagnosis, and the duration of PD symptoms at study entry.  
52 They were also assessed with the Hoehn and Yahr staging (H&Y),  
53 the UPDRS motor subsection, the 15-item Geriatric Depression  
54 Scale (GDS -15), the Cambridge Examination for Mental Disorders  
55 of the Elderly (CAMDEX), section B (CAMCOG), the Parkinson's  
56 disease Activities of Daily Living Scale (PADL) and the health  
57  
58  
59

1  
2  
3 related quality of life (HRQoL) measure the EQ5-D.[43-47] These  
4 measures were reassessed at approximately two yearly intervals  
5 from the midpoint of the recruitment phase of the cohort assembly.  
6 Diagnosis of PD based upon UKPDBB criteria was reassessed  
7 (RJM) at review to ensure diagnostic accuracy was maintained.  
8 The control cohort screening was also carried out approximately  
9 every two years from study entry which included review and  
10 updating of demographic variables, and reassessment with the  
11 GDS-15, CAMCOG, and EQ5-D. Analysis of the clinical  
12 assessments was the most recent prior to a subjects reported  
13 death. The diagnosis of dementia for PD and controls was based  
14 upon neuropsychological assessment, patient, and carer/informant  
15 interviews, along with the application of the Diagnostic and  
16 Statistical Manual of Mental disorders fourth edition criteria. [48]  
17

### 18 **Death certification collection and evaluation.**

19  
20 Review of hospital and primary care records were employed to  
21 ascertain the number of individuals who were deceased. All of the  
22 death certificates in this investigation were obtained from the local  
23 Births, Deaths, and Marriages central record office for the PD and  
24 control cohorts. Primary and underlying cause of death, along with  
25 the age of the subject and the age of death are recorded on all  
26 certificates in the UK. In addition, all certificates completed by a  
27 doctor within the UK and are coded using the ICD-10 system as  
28 follows:

29 Ia: Disease or condition leading directly to death.  
30 I(b): Other disease or condition, if any, leading to I(a).  
31 I(c): Other disease or condition, if any, leading to I(b)  
32 II: Other significant conditions that contributing to death but not  
33 related to the disease or condition causing it.  
34

35 From the information recorded on the death certificates, we  
36 grouped primary and underlying causes of death in to nine further  
37 categories which were, PD, Sepsis, Dementia, Cerebrovascular,  
38 Cardiac, Cancer, Pneumonia, Chronic lung disease, other  
39 disorders.  
40

### 41 **Ethical approval:**

42 **This study was approved by the North Wales Research and**  
43 **ethics committee (Central).**  
44

### 45 **Statistics.**

46  
47 The standardized mortality (SMR) was calculated as the ratio of  
48 observed deaths in the study group to expected deaths by  
49 employing age and gender specific morality rates for each year of  
50 the investigation, drawn from the UK Office of National Statistics  
51 interim life tables.  
52

53 Descriptive statistics (mean, SD, median) were used for continuous  
54 variables, whereas categorical variables were described as  
55 percentages of subjects in each group. Student t-tests, the chi-  
56 square test, and Univariate logrank statistics were employed to  
57  
58  
59

1  
2  
3 examine between-group differences and between observed and  
4 expected survival curves (all values two-tailed,  $p < 0.05$ ). The  
5 survival time of subjects was calculated from the date of baseline  
6 examination. The Kaplan-Meier estimates were used to calculate  
7 the observed survival curves. Cox proportional hazard analysis was  
8 employed to investigate baseline demographic and clinical  
9 covariates were related to mortality. Covariates included in the  
10 models, age at study entry, Age at death, gender, motor function  
11 (PD cohort), mood, HRQoL, and cognitive function. All data were  
12 analysed with the SPSS statistical package version 19. [49] The  
13 relative risk (RR) and 95% confidence interval (CI) were calculated  
14 using the Altman formula and MedCalc software. [50,51]  
15

## 16 17 **Results**

18  
19 From baseline to the study end date (30/01/2015), 158/166 (96%)  
20 of the PD and 34/102 (33%) of the control cohorts were decedents.  
21 In Table 1 the demographic and clinical outcomes of the PD and  
22 control cohorts are shown. Figure 1 illustrates the Kaplan-Meier  
23 survival curves for all cause mortality in the PD and control cohorts.  
24 The SMR for the whole PD cohort was 1.82 (95% CI: 1.55 – 2.13).  
25 A sub group analysis between new cases of PD ( $n = 80$ ) identified  
26 during the cases ascertainment phase of the investigation and  
27 existing cases of PD ( $n = 78$ ) revealed no excess mortality between  
28 the groups ( $p = 0.186$ ) despite the varying disease duration. By 18  
29 years the cumulative survival in the PD cohort (figure 1), was  
30 approximately 5% and 67% in the control cohort. The mortality risk  
31 controlled for age and gender was significantly higher risk in the PD  
32 cohort (HR 7.89,  $p = 0.0001$ ). Older age at entry into the current  
33 study was predictive of an increased risk of mortality in both cohorts  
34 (PD: HR 1.06,  $p = 0.0001$ ; Control: HR 1.09,  $p = 0.009$ ). There  
35 were no statistical differences found between the PD and control  
36 cohorts age at death (PD cohort 80.7 (7.1), Control cohort  
37 81.9(6.3);  $p = 0.552$ ). The strongest predictor associated with  
38 mortality in the PD cohort after controlling for age and gender was  
39 worsening motor symptoms (HR 1.06,  $p < 0.01$ ).  
40

41 As a primary cause of death (Part 1a on UK death certificates), PD  
42 was recorded in just over 4% of the cohort. In sections 1b and 1c  
43 (conditions substantially contributing to death), PD was reported in  
44 24% and 6% of cases respectively. In section II of the death  
45 certificates (co-morbid conditions substantially contributing to  
46 death); PD was reported in 19% of cases. Overall, PD as a  
47 contributing factor in the cause of death, was not reported  
48 anywhere on 75/158 (47%) of the PD cohort's certificates. The  
49 primary cause of death for the PD and control cohorts is shown in  
50 figures 2 & 3. The most common causes of death reported within  
51 the PD cohort (figure 2) were pneumonia (53%), followed by  
52 cardiac related deaths (21%). The most frequently recorded cause  
53 of death within the control cohort (figure 3) was cardiac disease  
54 (26%), cancer (24%), and pneumonia (18%). A comparison  
55 between the PD and Control cohorts revealed that the PD cohort  
56 were nearly three times more likely to have pneumonia recorded as  
57 a primary cause of death (RR, 2.94, 95% CI 1.40-6.19), Controlling  
58  
59  
60



1  
2  
3 for patients and controls with dementia still revealed a higher risk of  
4 mortality in PD for pneumonia (RR, 2.03, 95% CI 1.34-3.6). The  
5 controls compared to the PD cohort had over a threefold increased  
6 risk of having a cancer related disorder recorded as a primary or  
7 underlying cause of death (RR, 3.72, 95% CI 1.58 -8.72).

8  
9 Disease progression within the PD cohort was significantly  
10 associated with a worsening HRQoL at death ( $p < 0.0001$ ). When  
11 compared to the controls, HRQoL was significantly poorer for the  
12 PD cohort ( $p < 0.001$ ). At the time of death, 83/158 (52%) of the PD  
13 and 9/34 (26%) of the control cohorts were living in institutional  
14 care ( $p < 0.003$ ). Overall, the PD cohort decedents had a threefold  
15 increased probability to be living in institutional care at death (RR  
16 3.23, 95% CI 1.4-7.41). Controlling for age and duration of illness,  
17 the PD cohort living in institutional were also more likely to be  
18 demented (RR 2.7 (95% CI 1.21- 5.76). In contrast to the PD  
19 cohort, the control decedent's place of death was more likely to be  
20 in hospital (RR, 1.97, 1.48-2.62).

21  
22 As a primary or underlying cause of death, dementia was  
23 underreported on both the PD and control certificates. Although  
24 144/158 (91%) of the PD cohort had a diagnosis of dementia  
25 before their deaths, it was reported in only 14/144 of certificates.  
26 Similarly, only two of the control cohort had dementia recorded  
27 anywhere as a primary or underlying cause of death. Upon review  
28 however, a further four at the time of death had a confirmed  
29 diagnosis of dementia.

### 30 31 **Discussion.**

32  
33 This investigation reports the cause of death recorded on the death  
34 certificates of PD and age matched control cohorts in Denbighshire  
35 in the UK. We have previously reported that the life expectancy and  
36 average age at death in this PD cohort is much lower than the  
37 general population. [16] In the current study the overall SMR for our  
38 PD cohort was 1.82, indicating an excess mortality. This is similar  
39 to previous investigations where the SMR has been reported to  
40 range from 0.9 to 3.8 [16] However, recent community based  
41 incident cohort and incident clinical cohort investigations have  
42 reported lower SMR's of 1.29 (95% CI, 0.97-1.61), and 1.39 (95%  
43 CI, 1.10.-1.50), suggesting a moderate increase mortality  
44 compared to the general population. [16,52] The shorter duration of  
45 PD diagnosis, lower number of recorded deaths and shorter follow-  
46 up period compared with the current investigation may partially  
47 explain these differences the current and previously reported UK  
48 investigation. In addition the other European investigation was  
49 limited by the retrospective analysis of a data set from 1978-1998  
50 and recruitment solely from a clinical population.

51  
52 Overall death certification and clinical research data appear to  
53 provide quite disparate mortality data in PD. Although our PD  
54 cohort had confirmed UKPDSBB criteria for probable PD, as a  
55 primary cause of death (Part 1a), it was recorded in just in over 4%  
56 of the cohort. A further 30% had PD recorded in parts 1b and c of  
57 their death certificates, and on Part II of certificates it was recorded

1  
2  
3 in a further 19% of cases. Overall, PD was not cited anywhere on  
4 47% of the death certificates, which falls approximately midway  
5 with previous certification studies of between 14–70%. [16,34-37]  
6 The disparity reported between studies is most likely evidence of  
7 the differing methodologies employed such as, populations drawn  
8 from pharmaceutical trials alone, clinical samples, or retrospective  
9 case or chart record analysis.

10  
11 Pneumonia was the most cited primary cause of death (52%), in  
12 the current study. This observation has also been frequently  
13 reported in other investigations. [16,52] Patients with PD,  
14 particularly as they become frailer with the progression of their  
15 illness, are at greater risk for pulmonary complications, due to  
16 obstructive ventilation dysfunction, upper airway dysfunction, and  
17 weakened strength of respiratory muscles. [53-55] The most  
18 frequently reported other causes of death were cardiovascular  
19 disease (21%), cerebrovascular disease (8%) and malignancy  
20 (6%).

21  
22 This is the first study to our knowledge to describe underreporting  
23 of dementia as a primary, or underlying cause of death in a  
24 community based PD cohort. We have previously reported in this  
25 cohort the high prevalence of dementia of around 90%. [56] Upon  
26 review of the decedents death certificates, we found that less than  
27 10% had any mention of dementia as an immediate or underlying  
28 cause of death. Previous general population investigations have  
29 also shown that rates of certification mentioning dementia as a  
30 main or underlying cause of death have been consistently under  
31 reported. [57-60] This perhaps is because certification tends to  
32 focus upon the immediate cause of death and does not really  
33 capture the multiple factors that contribute to death, particularly  
34 with elderly individuals with multiple co-morbidity.

35  
36 This investigation found that the PD cohort were more likely than  
37 the controls to be living in a long term care setting before death.  
38 This may be a reflection of the duration, nature and the type of  
39 burden PD places upon relatives, especially those who have  
40 physical frailty themselves. Caring within the home setting may  
41 therefore become more impracticable and thus possibly  
42 precipitates entry into institutional care. The proportion of deaths in  
43 long term care amongst the PD cohort was also significantly higher  
44 than the control cohort. A recent study reported wide variations in  
45 the place of death of people with PD throughout the world,  
46 concluding that individual preference, social and socioeconomic  
47 circumstances; cultural, organisation and provision of health and  
48 palliative care all contribute to some extent the place of death. [61]

49  
50 In common with previous mortality investigations we found fewer  
51 recorded cancer deaths within the PD cohort. [62] It is thought that  
52 mutations of the PARK2 (Parkin) gene found in 6-8% of PD  
53 patients may act in some cancers as a tumour suppressor proteins.  
54 [63] The absence or mutation of the Parkin gene is found in several  
55 tumour types, suggesting that the mechanisms of cell death in PD  
56 may play a role in the inhibition or formation of some cancers.  
57 [64,65] The decreased risk of mortality from cancer has also been

1  
2  
3 reported in other neurodegenerative disease including Alzheimer's,  
4 Huntington's disease and in populations where mild to moderate  
5 with cognitive impairment has also been observed. [66-69] Further  
6 studies are needed to explore the associations, risks, possible  
7 genetic markers and underlying mechanisms in PD and other  
8 neurodegenerative conditions, to improve and identify and  
9 understand the role of cell death and its decreased cancer risk.

10  
11 We would caution the message often given to PD patients that they  
12 die with, rather than die of the condition. The non-motor features of  
13 PD such as dementia and autonomic dysfunction are frequently  
14 observed in all stages of the disease and most likely make a  
15 significant contribution to mortality.[70] One recent investigation  
16 reported that autonomic dysfunction and dementia in PD was  
17 predictive of increased mortality particularly in patients with  
18 orthostatic hypotension (OH).[71] Another meta-analysis which  
19 explored the association with OH and mortality in general  
20 populations also concluded that OH may confer a greater risk (RR,  
21 1.40) for mortality. [72] The association between the non-motor  
22 features of PD disease and mortality needs further research to  
23 understand and determine if these are causal or not.

24  
25 This study's strengths are the robust follow-up over an 18-year  
26 period of a community based cohort all of whom fulfilled criteria for  
27 PD and diagnostic re-evaluation was reviewed regularly over this  
28 period to ensure diagnostic accuracy. The repeat measure design  
29 of the study also allowed us to control for demographics, and motor  
30 and non-motor symptomatology. The limitations of the study are  
31 that the PD cohort had a mix of prevalent and incident cases, thus  
32 possibly over estimating the possible causal associations with  
33 mortality. However, controlling for prevalent and incident cases in  
34 our analysis did not reveal any between group significant  
35 differences. In light of our findings we feel that the current methods  
36 of capturing the cause of death significantly underestimate the true  
37 population burden of PD. The under reporting of dementia as an  
38 underlying cause of death in this cohort in addition to PD, also  
39 suggests that the interpretation of and quality of mortality data  
40 currently is not a valid or reliable source of data. Furthermore we  
41 would admonish the use of mortality statistics alone to plan for  
42 future service provision in this patient population.

## 43 **References**

- 44  
45 1. Devis T, Rooney C. Death certification and the  
46 epidemiologist. *Health Statistics Quarterly* 1999;1: 21–33.
- 47 2. Hanzlick R. Cause of Death and the Death Certificate:  
48 Important Information for Physicians, Coroners, Medical  
49 Examiners, and the Public. Northfield, IL: College of  
50 American Pathologists; 2006.
- 51 3. World Health Organisation. International Classification of  
52 Diseases and Related health problems. Geneva: WHO;  
53 1992. Tenth Revision.
- 54 4. Rooney C, Smith S. Implementation of ICD-10 for mortality  
55 data in England and Wales from January 2001. *Health*  
56 *Statistics Quarterly* 2000;8:41–50.
- 57  
58  
59  
60

5. Rooney C, Griffiths C, Cook L. Implementation of ICD-10 for cause of death coding – some preliminary results from the bridge coding stud. *Health Statistics Quarterly* 2002;**13**:31-41.
6. Neilsen GP, Björnsson J, Jonasson JG. The accuracy of death certificates. Implications for health statistics. *Virchows Arch A Pathol Anat Histopathol* 1991;**419**:143-6.
7. Sington JD, Cottrell BJ. Analysis of the sensitivity of death certificates in 440 hospital deaths: a comparison with necropsy findings. *J Clin Pathol* 2002;**55**:499–502.
8. Nashelesky MB, Lawrence CH. Accuracy of cause of death determination without forensic autopsy examination. *Am J Forensic Med Pathol* 2003;**24**:313–9.
9. Smith Sehdev AE, Hutchins GM. Problems with proper completion and accuracy of the cause-of-death statement. *Arch Intern Med* 2001;**161**:277–84.
10. Shibuya K, Scheele S, Boerma T. Health statistics: time to get serious. *Bull World Health Organ* 2005;**83**:722.
11. Cambridge B, Cina SJ. The accuracy of death certificate completion in a suburban community. *Am J Forensic Med Pathol* 2010;**31**:232-5.
12. Lu TH, Anderson RN, Kawachi I. Trends in frequency of reporting improper diabetes-related cause-of-death statements on death certificates, 1985–2005: An algorithm to identify incorrect causal sequences. *Am J Epidemiol* 2010;**171**:1069–78.
13. Drummond, MB, Wise, RA, John, M, *et al.* Accuracy of Death Certificates in COPD: Analysis from the TORCH Trial. *COPD: Journal of Chronic Obstructive Pulmonary Disease* 2010;**7**:179-185.
14. Rampatige R, Mikkelsen L, Hernandez B, *et al.* Systematic review of statistics on causes of deaths in hospitals: strengthening the evidence for policy-makers. *Bull World Health Organ* 2014;**92**:807-16.
15. World Health Organization. World Report on Ageing and Health 2015. Geneva: WHO.
16. Macleod AD, Taylor KS, Counsell CE. Mortality in Parkinson's disease: a systematic review and meta-analysis. *Mov Disord* 2014;**29**:1615-22.
17. Hobson P, Islam W, Roberts S, *et al.* The risk of bladder and autonomic dysfunction in a community cohort of Parkinson's disease patients and normal controls. *Parkinsonism Relat Disord* 2003;**10**:67-71.
18. Hely MA, Morris J.G.L, Reid WGJ, *et al.* Sydney Multicenter Study of Parkinson's disease: Non-L-Dopa-Responsive Problems Dominate at 15 years. *Mov Disord* 2005;**20**:190-9.
19. Weerkamp NJ1, Tissingh G, Poels PJ, *et al.* Nonmotor symptoms in nursing home residents with Parkinson's disease: prevalence and effect on quality of life. *J Am Geriatr Soc* 2013;**61**:1714-21.
20. Storch A, Schneider CB, Wolz M, *et al.* Nonmotor fluctuations in Parkinson disease: severity and correlation with motor complications. *Neurology* 2013;**80**:800–9.
21. Marras C, Chaudhuri KR. Nonmotor features of Parkinson's disease subtypes. *Mov Disord* 2016;**31**:1095–02.

22. Anthony HV, Schapira AHV, Chaudhuri KR, *et al.* Non-motor features of Parkinson disease. *Nature Reviews Neuroscience* 2017;**18**:435–50.
23. Aarsland D, Andersen K, Larsen JP, *et al.* Risk of Dementia in Parkinson's disease. A community-based, prospective study. *Neurology* 2001;**56**: 730-6.
24. Foltynie T, Brayne CE, Robbins TW, *et al.* The cognitive ability of an incident cohort of Parkinson's patients in the UK. The CamPaIGN study. *Brain* 2004;**127**:550–60.
25. Hobson JP, Meara RJ. The risk and incidence of dementia in a cohort of older subjects with Parkinson's disease in the UK. *Mov Disord* 2004;**19**:1043-49.
26. Hely MA, Reid WGJ, Adena MA, *et al.* The Sydney Multicentre Study of Parkinson's disease: The Inevitability of Dementia at 20 years. *Mov Disord* 2008;**26**:837-44.
27. Williams-Gray CH, Evans JR, *et al.* The distinct cognitive syndromes of Parkinson's disease: 5 year follow-up of the CamPaIGN cohort. *Brain* 2009;**132**:2958–69.
28. Williams-Gray CH, Foltynie T, Brayne CE, *et al.* Evolution of cognitive dysfunction in an incident Parkinson's disease cohort. *Brain* 2007;**130**:1787–98.
29. Nussbaum M, Treves R, Inzelberg JM, *et al.* Survival in Parkinson's disease: the effect of dementia. *Parkinsonism Relat Disord* 1998;**4**:179-81.
30. Levy G, Tang M-X, Louis ED, *et al.* The association of incident dementia with mortality in PD. *Neurology* 2002;**59**:1708-13.
31. Hughes TA, Ross HF, Mindman RHS, *et al.* Mortality in Parkinson's disease and its association with dementia and depression. *Acta Neurol Scand* 2004;**110**:118-123.
32. de Lau LM, Schipper MA, Hofman A, Koudstaal PJ, Bretler MMB. Prognosis of Parkinson's disease: Risk of Dementia and Mortality: The Rotterdam study. *Arc Neurol* 2005;**62**:1265-69.
33. Buter TC, van den Hout A, Matthews FE, *et al.* Dementia and survival in Parkinson's disease: A 12-year population study. *Neurology* 2008;**70**:1017-22.
34. Paulson GW, Gill WM. Are death certificates reliable to estimate the incidence of Parkinson's disease? *Mov Disord* 1995;**53**:587-8.
35. Phillips NJ, Reay J, Martyn CN. Validity of mortality data for Parkinson's disease. *J Epidemiol Community Health* 1999;**53**:587-88.
36. Pressley JC, Tang MX, Marder K, *et al.* Disparities in the recording of Parkinson's disease on death certificates. *Mov Disord* 2005;**20**(3): 315–321.
37. Benito-León J, Louis ED, Villarejo-Galende A, *et al.* Under-reporting of Parkinson's disease on death certificates: A population-based study (NEDICES). *Journal of the Neurological Sciences* 2014;**347**:188-92.
38. Donnan PT, Steinke DT, Stubbings C, *et al.* Selegiline and mortality in subjects with Parkinson's disease: A longitudinal community study. *Neurology* 2000;**55**,1785-9.



39. Marras C, McDermott, Rochon PA, *et al.* Survival in Parkinson disease; Thirteen-year follow-up of the DATATOP cohort. *Neurology* 2005;**64**:87-93.
40. Chen H, Zhang SM, Schwarzschild MA, *et al.* Survival of Parkinson's Disease in a Large Prospective cohort of male Health Professionals. *Mov Disord* 2006;**27**:1002-7.
41. Meara RJ, Bhowmick BK, Hobson JP. Accuracy of diagnosis in patients with presumed Parkinson's disease in a community based disease register. *Age Ageing* 1999;**28**: 99-02.
42. Gibb WRG, Lees AJ. The relevance of the Lewy body to the pathogenesis of idiopathic Parkinson's disease. *J Neurol Neurosurg Psychiatry* 1998;**51**:745-52.
43. Fahn S, Elton RL, and Members of the UPDRS Development Committee. Unified Parkinson's Disease Rating Scale. In: Fahn S, Marsden CD, Calne DB, Goldstein M eds. Recent developments in Parkinson's disease, Volume 2. Florham Park, NJ: Macmillan Health Care Information, 1987:153–64.
44. Sheikh JI, Yesavage JA. Geriatric Depression Scale (GDS). Recent evidence and development of a shorter version. in: T.L. Brink (Ed.) Clinical gerontology: A guide to assessment and intervention. The Haworth Press, Inc., New York; 1986:165–73.
45. Roth M, Tym E, Mountjoy CQ, Huppert FA, *et al.* CAMDEX. A standardised instrument for the diagnosis of mental disorder in the elderly with special reference to the early detection of dementia. *Br J Psychiatry* 1986;**149**:698-09.
46. Hobson JP, Edwards N, Meara RJ. The Parkinson's Disease Activities of Daily Living scale: A new simple and brief subjective measure of disability in Parkinson's disease. *Clin Rehabil* 2001;**15**:241-46
47. Williams, A. EuroQol - A new facility for the measurement of health-related quality of life. *Health Policy* 1990;**16**:199-208.
48. American Psychiatric Association. (2000). Diagnostic and statistical manual of mental disorders (4th ed., text rev.). Washington, DC: Author.
49. IBM Corp. Released 2010. IBM SPSS Statistics for Windows, Version 19.0. Armonk, NY: IBM Corp.
50. Altman DG (1991) Practical statistics for medical research. London: Chapman and Hall.
51. MedCalc for Windows, version 15.0 (MedCalc Software, Ostend, Belgium)
52. Duarte J, García Olmos LM, Mendoza A, *et al.* The natural history of Parkinson's disease in the province of Segovia: mortality in a longitudinal study (20-year follow-up). *Acta Neurol Scand* 2013;**127**:295-300.
53. D'Amelio M, Ragonese , Morganette L, *et al.* Long-term survival of Parkinson's disease. A population-based study. *J Neurol* 2006;**253**:33-7.
54. Estenne M, Hubert M, De Troyer A. Respiratory-muscle involvement in Parkinson's disease. *N Engl J Med* 1984;**311**:1516–17.

- 1
  - 2
  - 3
  - 4
  - 5
  - 6
  - 7
  - 8
  - 9
  - 10
  - 11
  - 12
  - 13
  - 14
  - 15
  - 16
  - 17
  - 18
  - 19
  - 20
  - 21
  - 22
  - 23
  - 24
  - 25
  - 26
  - 27
  - 28
  - 29
  - 30
  - 31
  - 32
  - 33
  - 34
  - 35
  - 36
  - 37
  - 38
  - 39
  - 40
  - 41
  - 42
  - 43
  - 44
  - 45
  - 46
  - 47
  - 48
  - 49
  - 50
  - 51
  - 52
  - 53
  - 54
  - 55
  - 56
  - 57
  - 58
  - 59
  - 60
55. Sabate M, Gonzalez I, Ruperez F, *et al.* Obstructive and restrictive pulmonary dysfunctions in Parkinson's disease. *J Neurol Sci* 1996;**138**:114–119.
56. Wang Y, Shao W-b, Gao L, *et al.* Abnormal Pulmonary Function and Respiratory Muscle Strength Findings in Chinese Patients with Parkinson's Disease and Multiple System Atrophy—Comparison with Normal Elderly. *PLoS ONE* 2014;**9**:e116123:doi:10.1371/journal.pone.0116123.
57. Hobson JP, Meara RJ. The Denbighshire cohort risk and incidence of Mild Cognitive Impairment and its progression to Parkinson's disease dementia at 16-years. *Int J Geriatr Psychiatr* 2015;**30**:1048-55.
58. Romero JP, Benito-Leon J, Mitchell AJ, *et al.* Under reporting of dementia deaths on death certificates using data from a population-based study (NEDICES). *J Alzheimers Dis* 2014;**39**:741-8.
59. Sleeman KE, Ho YK, Verne J, *et al.* Reversal of English trend towards hospital death in dementia: a population-based study of place of death and associated individual and regional factors, 2001–2010. *BMC Neurology* 2014;**14**: doi:10.1186/1471-2377-14-59.
60. Perera G, Stewart R, Higginson IJ, *et al.* Reporting of clinically diagnosed dementia on death certificates: retrospective cohort study. *Age Ageing* 2016;**45**: 668-73.
61. Garcia-Ptacek S, Kåreholt I, Cermakova P, *et al.* Causes of Death According to Death Certificates in Individuals with Dementia: A Cohort from the Swedish Dementia Registry. *J Am Geriatr Soc.* 2016; **64**: e137-142:doi:10.1111/jgs.14421.
62. Moens K, Houttekier D, Van den Block L, *et al.* Place of death of people living with Parkinson's disease: a population-level study in 11 countries. *BMC Palliat Care* 2015;**14**:28:doi:10.1186/s12904-015-0021-3.
63. Bajaj A, Driver JA, Schernhammer ES. Parkinson's disease and cancer risk: a systematic review and meta-analysis. *Cancer Causes Control* 2010;**21**:697-07.
64. Abou-Sleiman PM, Muqit MM, Wood NW. Expanding insights of mitochondrial dysfunction in Parkinson's disease. *Nat Rev Neurosci* 2006;**7**:207-19.
65. Dawson TM, Dawson VL. The role of parkin in familial and sporadic Parkinson's disease. *Mov Disord* 2010;**25**:S32-9.
66. Sorensen SA, Fenger K. Causes of death in patients with Huntington's disease and in unaffected first degree relatives. *J Med Genet* 1992;**29**:911–14.
67. Romero JP, Benito-León J, Louis ED, *et al.* Alzheimer's disease is associated with decreased risk of cancer-specific mortality: a prospective study (NEDICES). *J Alzheimers Dis* 2014;**40**:465-73.
68. Driver JA, Beiser A, Au R, *et al.* Inverse association between cancer and Alzheimer's disease: results from the Framingham Heart Study *BMJ* 2012;**344**: e1442:doi.org/10.1136/bmj.e1442.
69. Benito-León J, Romero JP, Louis ED, *et al.* Faster cognitive decline in elders without dementia and decreased risk of cancer mortality. *Neurology* 2014;**82**:1441–1448.



- 1  
2  
3 70. Goetz CG, Lutge W, Tanner CM. Autonomic dysfunction in  
4 Parkinson's disease. *Neurology* 1986;**36**:73-5.  
5 71. Stubendorff K, Aarsland D, Minthon L, *et al*. The Impact of  
6 Autonomic Dysfunction on Survival in Patients with  
7 Dementia with Lewy Bodies and Parkinson's Disease with  
8 Dementia. *PLoS One*. 2012;**7**:  
9 e45451.doi:10.1371/journal.pone.0045451  
10 72. Xin W, Lin Z, Mi S. Orthostatic hypotension and mortality  
11 risk: a meta-analysis of cohort studies. *Heart* 2014;**100**:406-  
12 13.  
13  
14  
15  
16  
17  
18  
19  
20  
21  
22  
23  
24  
25  
26  
27  
28  
29  
30  
31  
32  
33  
34  
35  
36  
37  
38  
39  
40  
41  
42  
43  
44  
45  
46  
47  
48  
49  
50  
51  
52  
53  
54  
55  
56  
57  
58  
59  
60

**Figure legends:**

Figure 1.  
Kaplan-Meier survival curves for all cause mortality in the PD and control cohorts.

Figure 2: Primary cause of death (Part 1a death certificates) reported for the PD cohort.

Figure 3: Primary cause of death (Part 1a death certificates) reported for the control cohort.

Table 1:  
Demographic and clinical outcomes (Means, *standard deviations*) of the PD and control cohorts

|                            | Parkinson's disease | Control     | <i>p</i> < 0.05 |
|----------------------------|---------------------|-------------|-----------------|
| Gender (female %)          | 44%                 | 41%         | NS              |
| Age (entry into study)     | 74.2 (8.6)          | 74.8 (6.6)  | NS              |
| Age at death               | 80.7 (7.1)          | 81.9 (6.3)  | NS              |
| Institutional care %       | 52%                 | 30%         | 0.003           |
| Place of death (Hospital)  | 37%                 | 74%         | 0.002           |
| EQ-5D (Weighted health)    | 0.58 (0.36)         | 0.79 (0.28) | 0.001           |
| EQ-5D (VAS %) <sup>†</sup> | 55 (16.5)           | 77 (17.6)   | 0.001           |
| Onset of PD                | 67.3 (10.7)         | -----       | -----           |
| Duration of PD             | 13.2 (8.8)          | -----       | -----           |
| UPDRS (motor section)      | 27.9 (11.7)         | -----       | -----           |
| H & Y                      | 2.9 (0.74)          | -----       | -----           |
| PADL                       | 3.1 (1.1)           | -----       | -----           |

<sup>†</sup> VAS = EQ-%D Visual analogue scale

**Funding:** This research received no specific grant from any funding agency in the public, commercial or not-for-profit sectors.

**Contributors:** PH and RJM conceived and designed the study, collected the data, and managed the database. PH managed the database, contributed to data cleaning, performed the statistical analyses. PH and RJM contributed to interpretation of the data. PH and RJM wrote the manuscript. All authors critically reviewed the manuscript and approved the final version to be published.

**Competing interests:** None declared.

**Patient consent:** All participants gave their informed and written consent on participation.

**Data sharing statement:** No additional data available.

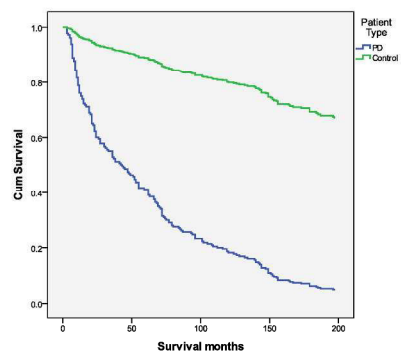

Figure 1.  
Kaplan-Meier survival curves for all cause mortality in the PD and control cohorts.

296x419mm (300 x 300 DPI)

1  
2  
3  
4  
5  
6  
7  
8  
9  
10  
11  
12  
13  
14  
15  
16  
17  
18  
19  
20  
21  
22  
23  
24  
25  
26  
27  
28  
29  
30  
31  
32  
33  
34  
35  
36  
37  
38  
39  
40  
41  
42  
43  
44  
45  
46  
47  
48  
49  
50  
51  
52  
53  
54  
55  
56  
57  
58  
59  
60

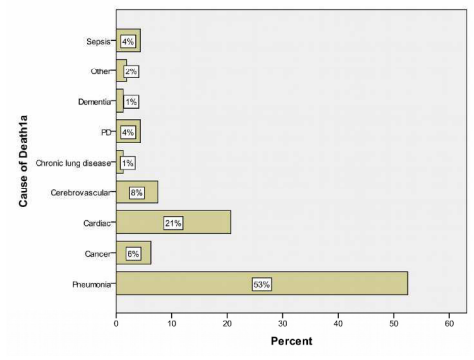

Figure 2: Primary cause of death (Part 1a death certificates) reported for the PD cohort.

297x420mm (300 x 300 DPI)

1  
2  
3  
4  
5  
6  
7  
8  
9  
10  
11  
12  
13  
14  
15  
16  
17  
18  
19  
20  
21  
22  
23  
24  
25  
26  
27  
28  
29  
30  
31  
32  
33  
34  
35  
36  
37  
38  
39  
40  
41  
42  
43  
44  
45  
46  
47  
48  
49  
50  
51  
52  
53  
54  
55  
56  
57  
58  
59  
60

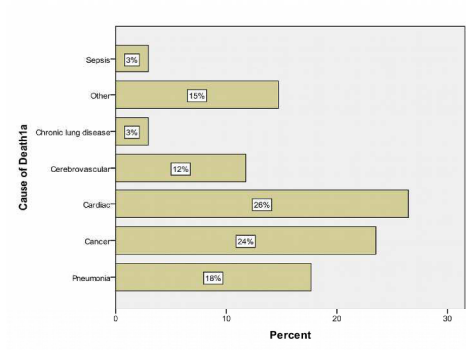

Figure 3: Primary cause of death (Part 1a death certificates) reported for the control cohort.

297x420mm (300 x 300 DPI)

**STROBE 2007 (v4) checklist of items to be included in reports of observational studies in epidemiology\***  
**Checklist for cohort, case-control, and cross-sectional studies (combined)**

| Section/Topic             | Item # | Recommendation                                                                                                                                                                                                                                                                                                                                                                                                                                                         | Reported on page # |
|---------------------------|--------|------------------------------------------------------------------------------------------------------------------------------------------------------------------------------------------------------------------------------------------------------------------------------------------------------------------------------------------------------------------------------------------------------------------------------------------------------------------------|--------------------|
| Title and abstract        | 1      | (a) Indicate the study’s design with a commonly used term in the title or the abstract                                                                                                                                                                                                                                                                                                                                                                                 | 1                  |
|                           |        | (b) Provide in the abstract an informative and balanced summary of what was done and what was found                                                                                                                                                                                                                                                                                                                                                                    | 2                  |
| <b>Introduction</b>       |        |                                                                                                                                                                                                                                                                                                                                                                                                                                                                        |                    |
| Background/rationale      | 2      | Explain the scientific background and rationale for the investigation being reported                                                                                                                                                                                                                                                                                                                                                                                   | 3                  |
| Objectives                | 3      | State specific objectives, including any pre-specified hypotheses                                                                                                                                                                                                                                                                                                                                                                                                      | 3,4                |
| <b>Methods</b>            |        |                                                                                                                                                                                                                                                                                                                                                                                                                                                                        |                    |
| Study design              | 4      | Present key elements of study design early in the paper                                                                                                                                                                                                                                                                                                                                                                                                                | 4                  |
| Setting                   | 5      | Describe the setting, locations, and relevant dates, including periods of recruitment, exposure, follow-up, and data collection                                                                                                                                                                                                                                                                                                                                        | 4                  |
| Participants              | 6      | (a) <i>Cohort study</i> —Give the eligibility criteria, and the sources and methods of selection of participants. Describe methods of follow-up<br><i>Case-control study</i> —Give the eligibility criteria, and the sources and methods of case ascertainment and control selection. Give the rationale for the choice of cases and controls<br><i>Cross-sectional study</i> —Give the eligibility criteria, and the sources and methods of selection of participants | 4                  |
|                           |        | (b) <i>Cohort study</i> —For matched studies, give matching criteria and number of exposed and unexposed<br><i>Case-control study</i> —For matched studies, give matching criteria and the number of controls per case                                                                                                                                                                                                                                                 | 4                  |
| Variables                 | 7      | Clearly define all outcomes, exposures, predictors, potential confounders, and effect modifiers. Give diagnostic criteria, if applicable                                                                                                                                                                                                                                                                                                                               | 4                  |
| Data sources/ measurement | 8*     | For each variable of interest, give sources of data and details of methods of assessment (measurement). Describe comparability of assessment methods if there is more than one group                                                                                                                                                                                                                                                                                   | 4,5                |
| Bias                      | 9      | Describe any efforts to address potential sources of bias                                                                                                                                                                                                                                                                                                                                                                                                              | 5,6,8              |
| Study size                | 10     | Explain how the study size was arrived at                                                                                                                                                                                                                                                                                                                                                                                                                              | n/a                |
| Quantitative variables    | 11     | Explain how quantitative variables were handled in the analyses. If applicable, describe which groupings were chosen and why                                                                                                                                                                                                                                                                                                                                           | n/a                |
| Statistical methods       | 12     | (a) Describe all statistical methods, including those used to control for confounding                                                                                                                                                                                                                                                                                                                                                                                  | 5                  |
|                           |        | (b) Describe any methods used to examine subgroups and interactions                                                                                                                                                                                                                                                                                                                                                                                                    | 5                  |
|                           |        | (c) Explain how missing data were addressed                                                                                                                                                                                                                                                                                                                                                                                                                            | n/a                |
|                           |        | (d) <i>Cohort study</i> —If applicable, explain how loss to follow-up was addressed<br><i>Case-control study</i> —If applicable, explain how matching of cases and controls was addressed                                                                                                                                                                                                                                                                              | n/a                |

|                          |     |                                                                                                                                                                                                              |     |
|--------------------------|-----|--------------------------------------------------------------------------------------------------------------------------------------------------------------------------------------------------------------|-----|
|                          |     | <i>Cross-sectional study</i> —If applicable, describe analytical methods taking account of sampling strategy                                                                                                 |     |
|                          |     | (e) Describe any sensitivity analyses                                                                                                                                                                        | n/a |
| <b>Results</b>           |     |                                                                                                                                                                                                              |     |
| Participants             | 13* | (a) Report numbers of individuals at each stage of study—eg numbers potentially eligible, examined for eligibility, confirmed eligible, included in the study, completing follow-up, and analysed            | 5   |
|                          |     | (b) Give reasons for non-participation at each stage                                                                                                                                                         | n/a |
|                          |     | (c) Consider use of a flow diagram                                                                                                                                                                           | --  |
| Descriptive data         | 14* | (a) Give characteristics of study participants (eg demographic, clinical, social) and information on exposures and potential confounders                                                                     | 5   |
|                          |     | (b) Indicate number of participants with missing data for each variable of interest                                                                                                                          | n/a |
|                          |     | (c) <i>Cohort study</i> —Summarise follow-up time (eg, average and total amount)                                                                                                                             | 5,6 |
| Outcome data             | 15* | <i>Cohort study</i> —Report numbers of outcome events or summary measures over time                                                                                                                          | 5,6 |
|                          |     | <i>Case-control study</i> —Report numbers in each exposure category, or summary measures of exposure                                                                                                         | 5,6 |
|                          |     | <i>Cross-sectional study</i> —Report numbers of outcome events or summary measures                                                                                                                           | --  |
| Main results             | 16  | (a) Give unadjusted estimates and, if applicable, confounder-adjusted estimates and their precision (eg, 95% confidence interval). Make clear which confounders were adjusted for and why they were included | 5,6 |
|                          |     | (b) Report category boundaries when continuous variables were categorized                                                                                                                                    | 5,6 |
|                          |     | (c) If relevant, consider translating estimates of relative risk into absolute risk for a meaningful time period                                                                                             | 5,6 |
| Other analyses           | 17  | Report other analyses done—eg analyses of subgroups and interactions, and sensitivity analyses                                                                                                               | 5,6 |
| <b>Discussion</b>        |     |                                                                                                                                                                                                              |     |
| Key results              | 18  | Summarise key results with reference to study objectives                                                                                                                                                     | 6   |
| Limitations              | 19  | Discuss limitations of the study, taking into account sources of potential bias or imprecision. Discuss both direction and magnitude of any potential bias                                                   | 8   |
| Interpretation           | 20  | Give a cautious overall interpretation of results considering objectives, limitations, multiplicity of analyses, results from similar studies, and other relevant evidence                                   | 8   |
| Generalisability         | 21  | Discuss the generalisability (external validity) of the study results                                                                                                                                        | 6-8 |
| <b>Other information</b> |     |                                                                                                                                                                                                              |     |
| Funding                  | 22  | Give the source of funding and the role of the funders for the present study and, if applicable, for the original study on which the present article is based                                                | 9   |

\*Give information separately for cases and controls in case-control studies and, if applicable, for exposed and unexposed groups in cohort and cross-sectional studies.

**Note:** An Explanation and Elaboration article discusses each checklist item and gives methodological background and published examples of transparent reporting. The STROBE checklist is best used in conjunction with this article (freely available on the Web sites of PLoS Medicine at <http://www.plosmedicine.org/>, Annals of Internal Medicine at <http://www.annals.org/>, and Epidemiology at <http://www.epidem.com/>). Information on the STROBE Initiative is available at [www.strobe-statement.org](http://www.strobe-statement.org).



# BMJ Open

## **Mortality and the quality of death certification in cohort of Parkinson's disease and matched controls in North Wales United Kingdom at 18-years: a community based cohort study.**

|                                 |                                                                                       |
|---------------------------------|---------------------------------------------------------------------------------------|
| Journal:                        | <i>BMJ Open</i>                                                                       |
| Manuscript ID                   | bmjopen-2017-018969.R2                                                                |
| Article Type:                   | Research                                                                              |
| Date Submitted by the Author:   | 13-Nov-2017                                                                           |
| Complete List of Authors:       | Hobson, Peter; Academic Unit<br>Meara, Jolyon; Academic Unit                          |
| <b>Primary Subject Heading</b>: | Neurology                                                                             |
| Secondary Subject Heading:      | Epidemiology                                                                          |
| Keywords:                       | Parkinson-s disease < NEUROLOGY, Mortality, Death certification, Dementia < NEUROLOGY |
|                                 |                                                                                       |

SCHOLARONE™  
Manuscripts

1  
2  
3 Mortality and the quality of death certification in cohort of  
4 Parkinson's disease and matched controls in North Wales United  
5 Kingdom at 18-years: a community based cohort study.  
6

7  
8 Peter Hobson<sup>1</sup>, Jolyon Meara<sup>1</sup>  
9

10 <sup>1</sup>Academic Unit,  
11 Betsi Cadwaladr University Health Board,  
12 Glan Clwyd Hospital,  
13 Rhyl, United Kingdom  
14

15 Correspondence to:  
16 Dr Peter Hobson; peter.hobson@wales.nhs.uk  
17

18 Academic Unit,  
19 Betsi Cadwaladr University Health Board  
20 Glan Clwyd Hospital,  
21 Sarn Lane,  
22 Bodelwyddan,  
23 LL18 5UJ, United Kingdom  
24 Ph: +44 1745 448788  
25

26 Keywords:  
27 Parkinson's disease, Mortality, Death certification, Dementia  
28

29 Word count: 4030  
30  
31  
32  
33  
34  
35  
36  
37  
38  
39  
40  
41  
42  
43  
44  
45  
46  
47  
48  
49  
50  
51  
52  
53  
54  
55  
56  
57  
58  
59  
60

## Abstract

**Objective:** To estimate the survival, mortality and quality of death certification in a community cohort of Parkinson's disease (PD) patients and controls in North Wales United Kingdom (UK).

**Setting and participants:** A total of 166 PD patients and 102 controls were included in this investigation. Hospital and primary care records were employed to ascertain the number of individuals who died during the investigation period. The primary and underlying cause of death was extracted from certificates obtained from the UK General Register Office.

**Results:** There were 158 (95%) deaths in the PD and 34 (33%) deaths recorded in the control cohort. The Standard Mortality Rate (SMR) was 1.82 (95% CI: 1.55 – 2.13). The main cause of death reported in the PD cohort was pneumonia (53%), followed by cardiac related deaths (21%). PD as the primary or underlying cause was not reported in 75/158 (47%) of the cohort. In addition, although 144 of the cohort had a diagnosis of dementia, this was reported in less than 10% (n=14) of their death certificates.

**Conclusion:** This community based investigation established that PD is associated with a higher risk of mortality compared to the general population. In addition, we found that the majority of patients with PD if they survive long enough will develop dementia. However, the reporting of PD and dementia as a cause or underlying cause of death on certificates was found to be suboptimal. The results from this investigation suggest that use of mortality statistics derived from death certification alone in epidemiological studies, healthcare planning and provision need to be reconsidered, because they are not a valid or reliable source of data capture.

## Strengths and limitations

- Community based longitudinal follow-up cohort design.
- All patients fulfilled diagnostic criteria for Parkinson's disease and or dementia.
- Baseline and subsequent repeat measure data capture allowed analysis for predictive outcomes.
- The cohort included prevalent and new cases Parkinson's disease. Although the varying disease duration of the Parkinson's disease cohort is a possible source of bias, we found no differences between the two groups survival.
- The control cohort included subjects without known neurological condition and thus may have intruded bias in the outcome comparisons with the Parkinson's disease patients.

## Introduction

Data drawn from death certificates is often employed by epidemiological, public health and research scientists to capture the incidence, prevalence and mortality in populations. In addition, these statistics are often utilized in the evaluation of public health interventions, setting priorities for medical research and health services, the planning of health services, and the clinical assessment of the effectiveness of those services. [1-3] The introduction of the revised International Classification of Diseases (ICD) system in 2001 aim was to improve the accuracy in the reported cause of death, where underlying conditions, mentioned in Part 1 or 2 of death certification take priority over others. [4,5] The underlying principle for this is that reporting of multiple causes of death should provide a better description of a particular disease or condition, allowing for more effective and meaningful data capture. The reliability of statistical information extracted from death certificates however still remains uncertain, where for example, rather than the underlying chronic condition being reported, a secondary cause of death is often reported as the main cause of death. [6-14]

Increasing demographic changes worldwide in elderly populations along with exponential rises in chronic conditions will most likely place greater social and fiscal demands on existing clinical, health and social services. [15] To ensure that mortality and survival rates are more precisely captured for these chronic conditions, the relative contributions different diseases have upon survival and mortality need to be more accurately measured. The challenge is to ensure that more reliable data are recorded to allow for more efficient planning for healthcare services and clinical interventions. Parkinson's disease (PD) is a progressive neurodegenerative disease strongly associated with increased mortality and lower life expectancy than the general population. [16] In addition to the motor symptoms of PD, many patients often live with a significant number of other non-motor conditions which contribute to the symptomatology of the disease. [17-22] In particular, dementia occurs frequently in the elderly PD patient and has been shown to be a strong predictor for increased mortality. [23-33] This most probably has implications for the quality of death certification, which in previous investigations has been found to be inconsistent, under recorded or an inaccurate record of the cause of death in patients. [16,34-37] The methodological design of previous investigations, where cohorts have been drawn from clinical populations or pharmaceutical trials alone may partially explain the variability between studies.[38-40] Only a small number of investigations have employed prospective community study methods to ascertain the utility of death certification in PD, and furthermore few have included a comparison control group.

This investigation is a report of the outcomes from a community cohort of PD patient and controls (without neurological disease) who have been regularly followed over the past 18 years in the county of Denbighshire in the United Kingdom. It aims firstly to examine the reported cause and quality of death certification in

1  
2  
3 these cohorts. Secondly, it will explore if PD and or dementia are  
4 reported as a cause or underlying cause of death on certificates.  
5 Thirdly, the demographic, motor and non-motor symptoms of PD  
6 will be explored to establish if they are associated or predictive with  
7 an increased risk of mortality.

## 8 **Methods**

### 9 **Subjects**

10  
11  
12 The patient and control recruitment methodology has been  
13 described in greater depth in previous reports [25,41]. In brief,  
14 between December 1994 and January 1997, employing multiple  
15 sources of ascertainment we recruited newly diagnosed PD  
16 patients and patients with an existing diagnosis of probable PD  
17 based upon the UKPDS brain bank criteria. [42] General  
18 practitioner (GP) records (n=74) in a defined Area of North Wales  
19 (Denbighshire), were employed to identify individuals in receipt of a  
20 defined group of anti-parkinsonian drugs, which included  
21 Levodopa, monomine-oxidase-B inhibitors, dopamine agonists and  
22 anti-muscarinic drugs. Additionally, hospital records were examined  
23 and patients who were not on active but known to medical services  
24 were also ascertained. In total, 402 patients were identified, of  
25 whom 213 fulfilled criteria for clinically probable PD patients (n=  
26 213). Of the original PD cohort, 25 died before they could be  
27 consented into the investigation, 13 withdrew consent and the  
28 remaining patients (n = 9) were lost to follow-up. This left at study  
29 entry 166 probable PD patients for follow-up from December 1997  
30 to January 2015.

31  
32 The control cohort was randomly drawn from two GP practices  
33 within the same geographical area of the PD cohort within the  
34 same time frame. The controls were matched for sex and age to  
35 PD patients ( $\pm$  3 years), were not known to have a diagnosis of  
36 clinically probable PD, parkinsonism, Alzheimer's or other  
37 dementia, stroke, neurological disorder, not in receipt of  
38 psychoactive drugs and did not have a known psychiatric, alcohol  
39 or substance abuse history. A total of 164 controls were invited to  
40 participate in the study, of whom 42 subsequently declined to  
41 participate and a further six withdrew consent at a later date. Upon  
42 initial baseline screening, eight were found to have previously  
43 suffered from a stroke, two had signs of parkinsonism and four  
44 fulfilled criteria for dementia and were excluded from further  
45 analysis, leaving a cohort of 102 control subjects.

### 46 **Clinical assessment.**

47  
48  
49 The PD and control cohorts demographic details were recorded  
50 which included, age, gender, educational attainment, social class,  
51 and smoking history. In addition to the demographic details, PD  
52 specific variables were also recorded which included, age of  
53 diagnosis, duration of symptoms, Hoehn and Yahr staging (H&Y),  
54 the UPDRS motor subsection, the 15-item Geriatric Depression  
55 Scale (GDS -15), the Cambridge Examination for Mental Disorders  
56 of the Elderly (CAMDEX), section B (CAMCOG), the Parkinson's  
57

1  
2  
3 disease Activities of Daily Living Scale (PADL) and the health  
4 related quality of life (HRQoL) measure the EQ5-D.[43-47] These  
5 measures were reassessed at approximately two yearly intervals  
6 from the midpoint of the recruitment phase of the cohort assembly.  
7 Diagnosis of PD based upon UKPDBB criteria was reassessed  
8 (RJM) at review to ensure diagnostic accuracy was maintained.  
9 The control cohort screening was also carried out approximately  
10 every two years from study entry which included review and  
11 updating of demographic variables, and reassessment with the  
12 GDS-15, CAMCOG, and EQ5-D. Analysis of the clinical  
13 assessments was the most recent prior to a subjects reported  
14 death. The diagnosis of dementia for PD and controls was based  
15 upon neuropsychological assessment, patient, and carer/informant  
16 interviews, along with the application of the Diagnostic and  
17 Statistical Manual of Mental disorders fourth edition criteria. [48]

### 18 19 20 **Death certification collection and evaluation.**

21 Review of hospital and primary care records were employed to  
22 ascertain the number of individuals who were deceased. All of the  
23 death certificates in this investigation were obtained from the local  
24 Births, Deaths, and Marriages central record office for the PD and  
25 control cohorts. Primary and underlying cause of death, along with  
26 the age of the subject and the age of death are recorded on all  
27 certificates in the UK. In addition, all certificates completed by a  
28 doctor within the UK and are coded using the ICD-10 system as  
29 follows:

30 Ia: Disease or condition leading directly to death.  
31 I(b): Other disease or condition, if any, leading to I(a).  
32 I(c): Other disease or condition, if any, leading to I(b)  
33 II: Other significant conditions that contributing to death but not  
34 related to the disease or condition causing it.  
35

36 From the information recorded on the death certificates, we  
37 grouped primary and underlying causes of death in to nine further  
38 categories which were, PD, Sepsis, Dementia, Cerebrovascular,  
39 Cardiac, Cancer, Pneumonia, Chronic lung disease, other  
40 disorders.  
41

### 42 **Ethical approval:**

43 This study was approved by the North Wales Research and ethics  
44 committee (Central).  
45

### 46 **Statistics.**

47  
48 The standardized mortality (SMR) was calculated as the ratio of  
49 observed deaths in the study group to expected deaths by  
50 employing age and gender specific morality rates for each year of  
51 the investigation, drawn from the UK Office of National Statistics  
52 interim life tables.  
53

54 Descriptive statistics (mean, SD, median) were used for continuous  
55 variables, whereas categorical variables were described as  
56 percentages of subjects in each group. Student t-tests, the chi-  
57  
58  
59

1  
2  
3 square test, and Univariate logrank statistics were employed to  
4 examine between-group differences and between observed and  
5 expected survival curves (all values two-tailed,  $p < 0.05$ ). The  
6 survival time of subjects was calculated from the date of baseline  
7 examination. The Kaplan-Meier estimates were used to calculate  
8 the observed survival curves. Cox proportional (PH) hazards  
9 analysis was employed to investigate the effect of several variables  
10 upon the time a specified event takes to happen, which in the  
11 current study was death. To satisfy the assumptions for the PH  
12 modelling, visual inspections of the residuals against the  
13 independent variable were made. This was carried out by plotting  
14 the cumulative survival function for each group against time and  
15 observing if the lines were parallel, proportional hazard was  
16 assumed. In addition, the -2 log likelihood ratio statistic was  
17 employed to determine how well the model (pattern of covariates)  
18 fitted the obtained data. The PH model covariates act as factors  
19 multiplying the hazard rate, which is the probability of experiencing  
20 the event which in this study is death. Covariates included in the  
21 PH model included, age at study entry, age at death, gender, motor  
22 function, mood, HRQoL, and cognitive function. The Hazard Ratio  
23 (HR) reported in this study provides an estimate of the relative risk.

24  
25 All data were analysed with the SPSS statistical package version  
26 19. [49] The relative risk (RR) and 95% confidence interval (CI)  
27 were calculated using the Altman formula and MedCalc software.  
28 [50,51]

## 29 **Results**

30  
31 From baseline to the study end date (30/01/2015), 158/166 (96%)  
32 of the PD and 34/102 (33%) of the control cohorts were decedents.  
33 In Table 1 the demographic and clinical outcomes of the PD and  
34 control cohorts are shown. Figure 1 illustrates the Kaplan-Meier  
35 survival curves for all cause mortality in the PD and control cohorts.  
36 The SMR for the whole PD cohort was 1.82 (95% CI: 1.55 – 2.13).  
37 A sub group analysis between new cases of PD ( $n = 80$ ) identified  
38 during the cases ascertainment phase of the investigation and  
39 existing cases of PD ( $n = 78$ ) revealed no excess mortality between  
40 the groups ( $p = 0.186$ ) despite the varying disease duration. By 18  
41 years the cumulative survival in the PD cohort (figure 1), was  
42 approximately 5% and 67% in the control cohort. The mortality risk  
43 controlled for age and gender was significantly higher risk in the PD  
44 cohort (HR 7.89,  $p = 0.0001$ ). Older age at entry into the current  
45 study was predictive of an increased risk of mortality in both  
46 cohorts (PD: HR 1.06,  $p = 0.0001$ ; Control: HR 1.09,  $p = 0.009$ ).  
47 There were no statistical differences found between the PD and  
48 control cohorts age at death (PD cohort 80.7 (7.1), Control cohort  
49 81.9(6.3);  $p = 0.552$ ). The strongest predictor associated with  
50 mortality in the PD cohort after controlling for age and gender was  
51 worsening motor symptoms (HR 1.06,  $p < 0.01$ ).  
52

53 As a primary cause of death (Part 1a on UK death certificates), PD  
54 was recorded in just over 4% of the cohort. In sections 1b and 1c  
55 (conditions substantially contributing to death), PD was reported in  
56 24% and 6% of cases respectively. In section II of the death  
57  
58  
59



certificates (co-morbid conditions substantially contributing to death); PD was reported in 19% of cases. Overall, PD as a contributing factor in the cause of death, was not reported anywhere on 75/158 (47%) of the PD cohort's certificates. The primary cause of death for the PD and control cohorts is shown in Table 2. The most common causes of death reported within the PD cohort were pneumonia (53%), followed by cardiac related deaths (21%). The most frequently recorded cause of death within the control cohort were cardiac disease (26%), cancer (24%), and pneumonia (18%). A comparison between the PD and Control cohorts revealed that the PD cohort were nearly three times more likely to have pneumonia recorded as a primary cause of death (RR, 2.94, 95% CI 1.40-6.19). Controlling for patients and controls with dementia still revealed a higher risk of mortality in PD for pneumonia (RR, 2.03, 95% CI 1.34-3.6). The controls compared to the PD cohort had over a threefold increased risk of having a cancer related disorder recorded as a primary or underlying cause of death (RR, 3.72, 95% CI 1.58 -8.72). Examining the smoking history between the two cohorts found no significant differences with the frequency of current or former smokers ( $p = 0.39$ ), nor were there differences in the cancer risk observed between the PD and controls cohorts who never smoked ( $p = 0.75$ ). However, significantly more of the controls who were smokers prior to their death had cancer recorded as a primary or secondary cause of death ( $p < 0.025$ ).

Disease progression within the PD cohort was significantly associated with a worsening HRQoL at death ( $p < 0.0001$ ). When compared to the controls, HRQoL was significantly poorer for the PD cohort ( $p < 0.001$ ). At the time of death, 83/158 (52%) of the PD and 9/34 (26%) of the control cohorts were living in institutional care ( $p < 0.003$ ). Overall, the PD cohort decedents had a threefold increased probability to be living in institutional care at death (RR 3.23, 95% CI 1.4-7.41). Controlling for age and duration of illness, the PD cohort living in institutional were also more likely to be demented (RR 2.7 (95% CI 1.21- 5.76). In contrast to the PD cohort, the control decedent's place of death was more likely to be in hospital (RR, 1.97, 1.48-2.62).

As a primary or underlying cause of death, dementia was underreported on both the PD and control certificates. Although 144/158 (91%) of the PD cohort had a diagnosis of dementia before their deaths, it was reported in only 14/144 of certificates. Similarly, only two of the control cohort had dementia recorded anywhere as a primary or underlying cause of death. Upon review however, a further four at the time of death had a confirmed diagnosis of dementia.

## Discussion.

This investigation reports the cause of death recorded on the death certificates of PD and age matched control cohorts in Denbighshire

1  
2  
3 in the UK. We have previously reported that the life expectancy and  
4 average age at death in this PD cohort is much lower than the  
5 general population. [16] In the current study the overall SMR for our  
6 PD cohort was 1.82, indicating an excess mortality. This is similar  
7 to previous investigations where the SMR has been reported to  
8 range from 0.9 to 3.8 [16] However, recent community based  
9 incident cohort and incident clinical cohort investigations have  
10 reported lower SMR's of 1.29 (95% CI, 0.97-1.61), and 1.39 (95%  
11 CI, 1.10.-1.50), suggesting a moderate increase mortality  
12 compared to the general population. [16,52] The shorter duration of  
13 PD diagnosis, lower number of recorded deaths and shorter follow-  
14 up period compared with the current investigation may partially  
15 explain these differences the current and previously reported UK  
16 investigation. In addition the other European investigation was  
17 limited by the retrospective analysis of a data set from 1978-1998  
18 and recruitment solely from a clinical population.

19  
20 Overall death certification and clinical research data appear to  
21 provide quite disparate mortality data in PD. Although our PD  
22 cohort had confirmed UKPDSBB criteria for probable PD, as a  
23 primary cause of death (Part 1a), it was recorded in just in over 4%  
24 of the cohort. A further 30% had PD recorded in parts 1b and c of  
25 their death certificates, and on Part II of certificates it was recorded  
26 in a further 19% of cases. Overall, PD was not cited anywhere on  
27 47% of the death certificates, which falls approximately midway  
28 with previous certification studies of between 14–70%. [16,34-37]  
29 The disparity reported between studies is most likely evidence of  
30 the differing methodologies employed such as, populations drawn  
31 from pharmaceutical trials alone, clinical samples, or retrospective  
32 case or chart record analysis.

33  
34 Pneumonia was the most cited primary cause of death (52%), in  
35 the current study. This observation has also been frequently  
36 reported in other investigations. [16,52] Patients with PD,  
37 particularly as they become frailer with the progression of their  
38 illness, are at greater risk for pulmonary complications, due to  
39 obstructive ventilation dysfunction, upper airway dysfunction, and  
40 weakened strength of respiratory muscles. [53-55] The most  
41 frequently reported other causes of death were cardiovascular  
42 disease (21%), cerebrovascular disease (8%) and malignancy  
43 (6%).

44  
45 This is the first study to our knowledge to describe underreporting  
46 of dementia as a primary, or underlying cause of death in a  
47 community based PD cohort. We have previously reported in this  
48 cohort the high prevalence of dementia of around 90%. [56] Upon  
49 review of the decedents death certificates, we found that less than  
50 10% had any mention of dementia as an immediate or underlying  
51 cause of death. Previous general population investigations have  
52 also shown that rates of certification mentioning dementia as a  
53 main or underlying cause of death have been consistently under  
54 reported. [57-61] This perhaps is because certification tends to  
55 focus upon the immediate cause of death and does not really  
56 capture the multiple factors that contribute to death, particularly  
57 with elderly individuals with multiple co-morbidity.

1  
2  
3  
4 This investigation found that the PD cohort were more likely than  
5 the controls to be living in a long term care setting before death.  
6 This may be a reflection of the duration, nature and the type of  
7 burden PD places upon relatives, especially those who have  
8 physical frailty themselves. Caring within the home setting may  
9 therefore become more impracticable and thus possibly  
10 precipitates entry into institutional care. The proportion of deaths in  
11 long term care amongst the PD cohort was also significantly higher  
12 than the control cohort. A recent study reported wide variations in  
13 the place of death of people with PD throughout the world,  
14 concluding that individual preference, social and socioeconomic  
15 circumstances; cultural, organisation and provision of health and  
16 palliative care all contribute to some extent the place of death. [62]

17  
18 In common with previous mortality investigations we found fewer  
19 recorded cancer deaths within the PD cohort. [63] We did not  
20 observe differences in the current or past smoking history  
21 frequency between our cohorts. Similarly no differences were  
22 revealed between the cohorts and cancer risk in those who had  
23 never smoked. There were no differences seen in the types of  
24 cancer type on death certificates compared to smokers and non-  
25 smokers. However, in the current smoker groups prior to death,  
26 significantly more cancer associated deaths were recorded in the  
27 controls compared to the PD cohort. A possible explanation for this  
28 disparity may be that mutations of the PARK2 (Parkin) gene found  
29 in 6-8% of PD patients, may act in some cancers as a tumour  
30 suppressor proteins. [64] The absence or mutation of the Parkin  
31 gene is found in several tumour types, suggesting that the  
32 mechanisms of cell death in PD may play a role in the inhibition or  
33 formation of some cancers. [64,65] The decreased risk of mortality  
34 from cancer has also been reported in other neurodegenerative  
35 disease including Alzheimer's, Huntington's disease and in  
36 populations where mild to moderate with cognitive impairment has  
37 also been observed. [66-69] Further studies are needed to explore  
38 the associations, risks, possible genetic markers and underlying  
39 mechanisms in PD and other neurodegenerative conditions, to  
40 improve and identify and understand the role of cell death and its  
41 decreased cancer risk.

42  
43 We would caution the message often given to PD patients that they  
44 die with, rather than die of the condition. The non-motor features of  
45 PD such as dementia and autonomic dysfunction are frequently  
46 observed in all stages of the disease and most likely make a  
47 significant contribution to mortality.[70] One recent investigation  
48 reported that autonomic dysfunction and dementia in PD was  
49 predictive of increased mortality particularly in patients with  
50 orthostatic hypotension (OH).[71] Another meta-analysis which  
51 explored the association with OH and mortality in general  
52 populations also concluded that OH may confer a greater risk (RR,  
53 1.40) for mortality. [72] The association between the non-motor  
54 features of PD disease and mortality needs further research to  
55 understand and determine if these are causal or not.  
56  
57  
58  
59

1  
2  
3 This study's strengths are the robust follow-up over an 18-year  
4 period of a community based cohort all of whom fulfilled criteria for  
5 PD and diagnostic re-evaluation was reviewed regularly over this  
6 period to ensure diagnostic accuracy. The repeat measure design  
7 of the study also allowed us to control for demographics, and motor  
8 and non-motor symptomatology. The limitations of the study are  
9 that the PD cohort had a mix of prevalent and incident cases, thus  
10 possibly over estimating the possible causal associations with  
11 mortality. However, controlling for prevalent and incident cases in  
12 our analysis did not reveal any between group significant  
13 differences. Our control cohort was selected carefully in terms of  
14 age, gender, and disease exposure and may not representative of  
15 the general population. We endeavoured to reduce this potential  
16 bias by randomly selecting controls from general practitioner lists  
17 within defined catchment area as the PD cohort. However,  
18 excluding controls with known neurological, psychiatric illness and  
19 possibly healthier general health may be a potential source of error.  
20 The ideal comparison group in a cohort study would be exactly the  
21 same as the cohort of interest, except that they would not have the  
22 condition under investigation. In older populations, the selection of  
23 any control group is often a compromise in ensuring that the control  
24 group differs enough with respect to the condition of interest, yet  
25 are similar as possible to explore what other factors influence the  
26 outcome under investigation. We believe that our selection of  
27 controls without neurological or psychiatric disease allowed us to  
28 control for confounding factors in the analysis in both cohorts that  
29 would not have been possible in the general population.

30  
31 In light of our findings we feel that the current methods of capturing  
32 the cause of death by certification will significantly underestimate  
33 the true population burden of PD. The under reporting of dementia  
34 as an underlying cause of death in this cohort in addition to PD, also  
35 suggests that the interpretation of and quality of mortality data  
36 currently is not a valid or reliable source of data. Furthermore we  
37 would admonish the use of mortality statistics alone to plan for  
38 future service provision in this patient population.

### 39 40 **References**

- 41 1. Devis T, Rooney C. Death certification and the  
42 epidemiologist. *Health Statistics Quarterly* 1999;1: 21–33.
- 43 2. Hanzlick R. Cause of Death and the Death Certificate:  
44 Important Information for Physicians, Coroners, Medical  
45 Examiners, and the Public. Northfield, IL: College of  
46 American Pathologists; 2006.
- 47 3. World Health Organisation. International Classification of  
48 Diseases and Related health problems. Geneva: WHO;  
49 1992. Tenth Revision.
- 50 4. Rooney C, Smith S. Implementation of ICD-10 for mortality  
51 data in England and Wales from January 2001. *Health*  
52 *Statistics Quarterly* 2000;8:41–50.
- 53 5. Rooney C, Griffiths C, Cook L. Implementation of ICD-10 for  
54 cause of death coding – some preliminary results from the  
55 bridge coding stud. *Health Statistics Quarterly* 2002;13:31-  
56 41.

- 1
  - 2
  - 3
  - 4
  - 5
  - 6
  - 7
  - 8
  - 9
  - 10
  - 11
  - 12
  - 13
  - 14
  - 15
  - 16
  - 17
  - 18
  - 19
  - 20
  - 21
  - 22
  - 23
  - 24
  - 25
  - 26
  - 27
  - 28
  - 29
  - 30
  - 31
  - 32
  - 33
  - 34
  - 35
  - 36
  - 37
  - 38
  - 39
  - 40
  - 41
  - 42
  - 43
  - 44
  - 45
  - 46
  - 47
  - 48
  - 49
  - 50
  - 51
  - 52
  - 53
  - 54
  - 55
  - 56
  - 57
  - 58
  - 59
  - 60
6. Neilsen GP, Björnsson J, Jonasson JG. The accuracy of death certificates. Implications for health statistics. *Virchows Arch A Pathol Anat Histopathol* 1991;**419**:143-6.
  7. Sington JD, Cottrell BJ. Analysis of the sensitivity of death certificates in 440 hospital deaths: a comparison with necropsy findings. *J Clin Pathol* 2002;**55**:499–502.
  8. Nashelesky MB, Lawrence CH. Accuracy of cause of death determination without forensic autopsy examination. *Am J Forensic Med Pathol* 2003;**24**:313–9.
  9. Smith Sehdev AE, Hutchins GM. Problems with proper completion and accuracy of the cause-of-death statement. *Arch Intern Med* 2001;**161**:277–84.
  10. Shibuya K, Scheele S, Boerma T. Health statistics: time to get serious. *Bull World Health Organ* 2005;**83**:722.
  11. Cambridge B, Cina SJ. The accuracy of death certificate completion in a suburban community. *Am J Forensic Med Pathol* 2010;**31**:232-5.
  12. Lu TH, Anderson RN, Kawachi I. Trends in frequency of reporting improper diabetes-related cause-of-death statements on death certificates, 1985–2005: An algorithm to identify incorrect causal sequences. *Am J Epidemiol* 2010;**171**:1069–78.
  13. Drummond, MB, Wise, RA, John, M, *et al.* Accuracy of Death Certificates in COPD: Analysis from the TORCH Trial. *COPD: Journal of Chronic Obstructive Pulmonary Disease* 2010;**7**:179-185.
  14. Rampatige R, Mikkelsen L, Hernandez B, *et al.* Systematic review of statistics on causes of deaths in hospitals: strengthening the evidence for policy-makers. *Bull World Health Organ* 2014;**92**:807-16.
  15. World Health Organization. World Report on Ageing and Health 2015. Geneva: WHO.
  16. Macleod AD, Taylor KS, Counsell CE. Mortality in Parkinson's disease: a systematic review and meta-analysis. *Mov Disord* 2014;**29**:1615-22.
  17. Hobson P, Islam W, Roberts S, *et al.* The risk of bladder and autonomic dysfunction in a community cohort of Parkinson's disease patients and normal controls. *Parkinsonism Relat Disord* 2003;**10**:67-71.
  18. Hely MA, Morris J.G.L, Reid WGJ, *et al.* Sydney Multicenter Study of Parkinson's disease: Non-L-Dopa-Responsive Problems Dominate at 15 years. *Mov Disord* 2005;**20**:190-9.
  19. Weerkamp NJ1, Tissingh G, Poels PJ, *et al.* Nonmotor symptoms in nursing home residents with Parkinson's disease: prevalence and effect on quality of life. *J Am Geriatr Soc* 2013;**61**:1714-21.
  20. Storch A, Schneider CB, Wolz M, *et al.* Nonmotor fluctuations in Parkinson disease: severity and correlation with motor complications. *Neurology* 2013;**80**:800–9.
  21. Marras C, Chaudhuri KR. Nonmotor features of Parkinson's disease subtypes. *Mov Disord* 2016;**31**:1095–02.
  22. Anthony HV, Schapira AHV, Chaudhuri KR, *et al.* Non-motor features of Parkinson disease. *Nature Reviews Neuroscience* 2017;**18**:435–50.



23. Aarsland D, Andersen K, Larsen JP, *et al*. Risk of Dementia in Parkinson's disease. A community-based, prospective study. *Neurology* 2001;**56**: 730-6.
24. Foltynie T, Brayne CE, Robbins TW, *et al*. The cognitive ability of an incident cohort of Parkinson's patients in the UK. The CamPaIGN study. *Brain* 2004;**127**:550-60.
25. Hobson JP, Meara RJ. The risk and incidence of dementia in a cohort of older subjects with Parkinson's disease in the UK. *Mov Disord* 2004;**19**:1043-49.
26. Hely MA, Reid WGJ, Adena MA, *et al*. The Sydney Multicentre Study of Parkinson's disease: The Inevitability of Dementia at 20 years. *Mov Disord* 2008;**26**:837-44.
27. Williams-Gray CH, Evans JR, *et al*. The distinct cognitive syndromes of Parkinson's disease: 5 year follow-up of the CamPaIGN cohort. *Brain* 2009;**132**:2958-69.
28. Williams-Gray CH, Foltynie T, Brayne CE, *et al*. Evolution of cognitive dysfunction in an incident Parkinson's disease cohort. *Brain* 2007;**130**:1787-98.
29. Nussbaum M, Treves R, Inzelberg JM, *et al*. Survival in Parkinson's disease: the effect of dementia. *Parkinsonism Relat Disord* 1998;**4**:179-81.
30. Levy G, Tang M-X, Louis ED, *et al*. The association of incident dementia with mortality in PD. *Neurology* 2002;**59**:1708-13.
31. Hughes TA, Ross HF, Mindman RHS, *et al*. Mortality in Parkinson's disease and its association with dementia and depression. *Acta Neurol Scand* 2004;**110**:118-123.
32. de Lau LM, Schipper MA, Hofman A, Koudstaal PJ, Bretler MMB. Prognosis of Parkinson's disease: Risk of Dementia and Mortality: The Rotterdam study. *Arc Neurol* 2005;**62**:1265-69.
33. Buter TC, van den Hout A, Matthews FE, *et al*. Dementia and survival in Parkinson's disease: A 12-year population study. *Neurology* 2008;**70**:1017-22.
34. Paulson GW, Gill WM. Are death certificates reliable to estimate the incidence of Parkinson's disease? *Mov Disord* 1995;**53**:587-8.
35. Phillips NJ, Reay J, Martyn CN. Validity of mortality data for Parkinson's disease. *J Epidemiol Community Health* 1999;**53**:587-88.
36. Pressley JC, Tang MX, Marder K, *et al*. Disparities in the recording of Parkinson's disease on death certificates. *Mov Disord* 2005;**20**(3): 315-321.
37. Benito-León J, Louis ED, Villarejo-Galende A, *et al*. Under-reporting of Parkinson's disease on death certificates: A population-based study (NEDICES). *Journal of the Neurological Sciences* 2014;**347**:188-92.
38. Donnan PT, Steinke DT, Stubbings C, *et al*. Selegiline and mortality in subjects with Parkinson's disease: A longitudinal community study. *Neurology* 2000;**55**:1785-9.
39. Marras C, McDermott, Rochon PA, *et al*. Survival in Parkinson disease; Thirteen-year follow-up of the DATATOP cohort. *Neurology* 2005;**64**:87-93.

- 1
  - 2
  - 3
  - 4
  - 5
  - 6
  - 7
  - 8
  - 9
  - 10
  - 11
  - 12
  - 13
  - 14
  - 15
  - 16
  - 17
  - 18
  - 19
  - 20
  - 21
  - 22
  - 23
  - 24
  - 25
  - 26
  - 27
  - 28
  - 29
  - 30
  - 31
  - 32
  - 33
  - 34
  - 35
  - 36
  - 37
  - 38
  - 39
  - 40
  - 41
  - 42
  - 43
  - 44
  - 45
  - 46
  - 47
  - 48
  - 49
  - 50
  - 51
  - 52
  - 53
  - 54
  - 55
  - 56
  - 57
  - 58
  - 59
  - 60
40. Chen H, Zhang SM, Schwarzschild MA, *et al.* Survival of Parkinson's Disease in a Large Prospective cohort of male Health Professionals. *Mov Disord* 2006;**27**:1002-7.
41. Meara RJ, Bhowmick BK, Hobson JP. Accuracy of diagnosis in patients with presumed Parkinson's disease in a community based disease register. *Age Ageing* 1999;**28**: 99-02.
42. Gibb WRG, Lees AJ. The relevance of the Lewy body to the pathogenesis of idiopathic Parkinson's disease. *J Neurol Neurosurg Psychiatry* 1998;**51**:745-52.
43. Fahn S, Elton RL, and Members of the UPDRS Development Committee. Unified Parkinson's Disease Rating Scale. In: Fahn S, Marsden CD, Calne DB, Goldstein M eds. Recent developments in Parkinson's disease, Volume 2. Florham Park, NJ: Macmillan Health Care Information, 1987:153–64.
44. Sheikh JI, Yesavage JA. Geriatric Depression Scale (GDS). Recent evidence and development of a shorter version. in: T.L. Brink (Ed.) Clinical gerontology: A guide to assessment and intervention. The Haworth Press, Inc., New York; 1986:165–73.
45. Roth M, Tym E, Mountjoy CQ, Huppert FA, *et al.* CAMDEX. A standardised instrument for the diagnosis of mental disorder in the elderly with special reference to the early detection of dementia. *Br J Psychiatry* 1986;**149**:698-09.
46. Hobson JP, Edwards N, Meara RJ. The Parkinson's Disease Activities of Daily Living scale: A new simple and brief subjective measure of disability in Parkinson's disease. *Clin Rehabil* 2001;**15**:241-46
47. Williams, A. EuroQol - A new facility for the measurement of health-related quality of life. *Health Policy* 1990;**16**:199-208.
48. American Psychiatric Association. (2000). Diagnostic and statistical manual of mental disorders (4th ed., text rev.). Washington, DC: Author.
49. IBM Corp. Released 2010. IBM SPSS Statistics for Windows, Version 19.0. Armonk, NY: IBM Corp.
50. Altman DG (1991) Practical statistics for medical research. London: Chapman and Hall.
51. MedCalc for Windows, version 15.0 (MedCalc Software, Ostend, Belgium)
52. Duarte J, García Olmos LM, Mendoza A, *et al.* The natural history of Parkinson's disease in the province of Segovia: mortality in a longitudinal study (20-year follow-up). *Acta Neurol Scand* 2013;**127**:295-300.
53. D'Amelio M, Ragonese , Morganette L, *et al.* Long-term survival of Parkinson's disease. A population-based study. *J Neurol* 2006;**253**:33-7.
54. Estenne M, Hubert M, De Troyer A. Respiratory-muscle involvement in Parkinson's disease. *N Engl J Med* 1984;**311**:1516–17.
55. Sabate M, Gonzalez I, Ruperez F, *et al.* Obstructive and restrictive pulmonary dysfunctions in Parkinson's disease. *J Neurol Sci* 1996;**138**:114–119.



- 1
  - 2
  - 3
  - 4
  - 5
  - 6
  - 7
  - 8
  - 9
  - 10
  - 11
  - 12
  - 13
  - 14
  - 15
  - 16
  - 17
  - 18
  - 19
  - 20
  - 21
  - 22
  - 23
  - 24
  - 25
  - 26
  - 27
  - 28
  - 29
  - 30
  - 31
  - 32
  - 33
  - 34
  - 35
  - 36
  - 37
  - 38
  - 39
  - 40
  - 41
  - 42
  - 43
  - 44
  - 45
  - 46
  - 47
  - 48
  - 49
  - 50
  - 51
  - 52
  - 53
  - 54
  - 55
  - 56
  - 57
  - 58
  - 59
  - 60
56. Wang Y, Shao W-b, Gao L, *et al.* Abnormal Pulmonary Function and Respiratory Muscle Strength Findings in Chinese Patients with Parkinson's Disease and Multiple System Atrophy—Comparison with Normal Elderly. *PLoS ONE* 2014;**9**:e116123:doi:10.1371/journal.pone.0116123.
57. Hobson JP, Meara RJ. The Denbighshire cohort risk and incidence of Mild Cognitive Impairment and its progression to Parkinson's disease dementia at 16-years. *Int J Geriatr Psychiatr* 2015;**30**:1048-55.
58. Romero JP, Benito-Leon J, Mitchell AJ, *et al.* Under reporting of dementia deaths on death certificates using data from a population-based study (NEDICES). *J Alzheimers Dis* 2014;**39**:741-8.
59. Sleeman KE, Ho YK, Verne J, *et al.* Reversal of English trend towards hospital death in dementia: a population-based study of place of death and associated individual and regional factors, 2001–2010. *BMC Neurology* 2014;**14**: doi:10.1186/1471-2377-14-59.
60. Perera G, Stewart R, Higginson IJ, *et al.* Reporting of clinically diagnosed dementia on death certificates: retrospective cohort study. *Age Ageing* 2016;**45**: 668-73.
61. Garcia-Ptacek S, Kåreholt I, Cermakova P, *et al.* Causes of Death According to Death Certificates in Individuals with Dementia: A Cohort from the Swedish Dementia Registry. *J Am Geriatr Soc.* 2016; **64**: e137-142:doi:10.1111/jgs.14421.
62. Moens K, Houttekier D, Van den Block L, *et al.* Place of death of people living with Parkinson's disease: a population-level study in 11 countries. *BMC Palliat Care* 2015;**14**:28:doi:10.1186/s12904-015-0021-3.
63. Bajaj A, Driver JA, Schernhammer ES. Parkinson's disease and cancer risk: a systematic review and meta-analysis. *Cancer Causes Control* 2010;**21**:697-07.
64. Abou-Sleiman PM, Muqit MM, Wood NW. Expanding insights of mitochondrial dysfunction in Parkinson's disease. *Nat Rev Neurosci* 2006;**7**:207-19.
65. Dawson TM, Dawson VL. The role of parkin in familial and sporadic Parkinson's disease. *Mov Disord* 2010;**25**:S32-9.
66. Sorensen SA, Fenger K. Causes of death in patients with Huntington's disease and in unaffected first degree relatives. *J Med Genet* 1992;**29**:911–14.
67. Romero JP, Benito-León J, Louis ED, *et al.* Alzheimer's disease is associated with decreased risk of cancer-specific mortality: a prospective study (NEDICES). *J Alzheimers Dis* 2014;**40**:465-73.
68. Driver JA, Beiser A, Au R, *et al.* Inverse association between cancer and Alzheimer's disease: results from the Framingham Heart Study *BMJ* 2012;**344**: e1442:doi.org/10.1136/bmj.e1442.
69. Benito-León J, Romero JP, Louis ED, *et al.* Faster cognitive decline in elders without dementia and decreased risk of cancer mortality. *Neurology* 2014;**82**:1441–1448.
70. Goetz CG, Lütge W, Tanner CM. Autonomic dysfunction in Parkinson's disease. *Neurology* 1986;**36**:73-5.
71. Stubendorff K, Aarsland D, Minthon L, *et al.* The Impact of Autonomic Dysfunction on Survival in Patients with

1  
2  
3  
4  
5  
6  
7  
8  
9  
10  
11  
12  
13  
14  
15  
16  
17  
18  
19  
20  
21  
22  
23  
24  
25  
26  
27  
28  
29  
30  
31  
32  
33  
34  
35  
36  
37  
38  
39  
40  
41  
42  
43  
44  
45  
46  
47  
48  
49  
50  
51  
52  
53  
54  
55  
56  
57  
58  
59  
60

Dementia with Lewy Bodies and Parkinson's Disease with  
Dementia. *PLoS One*. 2012;**7**:  
e45451.doi:10.1371/journal.pone.0045451  
72. Xin W, Lin Z, Mi S. Orthostatic hypotension and mortality  
risk: a meta-analysis of cohort studies. *Heart* 2014;**100**:406-  
13.

For peer review only

Table 1:  
Demographic and clinical outcomes (Means, *standard deviations*)  
of the PD and control cohorts

|                              | Parkinson's disease | Control     | <i>p</i> < 0.05 |
|------------------------------|---------------------|-------------|-----------------|
| Gender (female %)            | 44%                 | 41%         | NS              |
| Age (entry into study)       | 74.2 (8.6)          | 74.8 (6.6)  | NS              |
| Age at death                 | 80.7 (7.1)          | 81.9 (6.3)  | NS              |
| Institutional care %         | 52%                 | 30%         | 0.003           |
| Place of death<br>(Hospital) | 37%                 | 74%         | 0.002           |
| EQ-5D (Weighted health)      | 0.58 (0.36)         | 0.79 (0.28) | 0.001           |
| EQ-5D (VAS %) <sup>†</sup>   | 55 (16.5)           | 77 (17.6)   | 0.001           |
| Onset of PD                  | 67.3 (10.7)         | -----       | -----           |
| Duration of PD               | 13.2 (8.8)          | -----       | -----           |
| UPDRS (motor section)        | 27.9 (11.7)         | -----       | -----           |
| H & Y                        | 2.9 (0.74)          | -----       | -----           |
| PADL                         | 3.1 (1.1)           | -----       | -----           |

<sup>†</sup> VAS = EQ-5D Visual Analogue Scale.

Table 2.

Primary cause of death (Part 1a death certificates) reported for the PD (n =158) and control (n =34) cohorts.

|                     | Parkinson's disease | Control   |
|---------------------|---------------------|-----------|
| Pneumonia           | 84 (53.2%)          | 6 (17.6%) |
| Cardiac             | 33 (20.9%)          | 9 (26.5%) |
| Cancer              | 10 ( 6.3%)          | 8 (23.5%) |
| Cerebrovascular     | 12 ( 7.6%)          | 4 (11.8%) |
| Parkinson's disease | 7 ( 4.4%)           | 0         |
| Other*              | 12                  | 7         |

\* Other includes Sepsis; Dementia; Immobility; Chronic obstructive pulmonary disease; Old age; Fracture neck of Femur; Multi-organ failure; Motor Neurone disease.

Figure 1.  
Kaplan-Meier survival curves for all cause mortality in the PD and control cohorts

1  
2  
3 **Funding:** This research received no specific grant from any funding  
4 agency in the public, commercial or not-for-profit sectors.  
5

6 **Contributors:** PH and RJM conceived and designed the study,  
7 collected the data, and managed the database. PH managed the  
8 database, contributed to data cleaning, performed the statistical  
9 analyses. PH and RJM contributed to interpretation of the data. PH  
10 and RJM wrote the manuscript. All authors critically reviewed the  
11 manuscript and approved the final version to be published.  
12

13 **Competing interests:** None declared.  
14

15 **Patient consent:** All participants gave their informed and written  
16 consent on participation.  
17

18 **Data sharing statement:** No additional data available.  
19  
20  
21  
22  
23  
24  
25  
26  
27  
28  
29  
30  
31  
32  
33  
34  
35  
36  
37  
38  
39  
40  
41  
42  
43  
44  
45  
46  
47  
48  
49  
50  
51  
52  
53  
54  
55  
56  
57  
58  
59  
60

1  
2  
3  
4  
5  
6  
7  
8  
9  
10  
11  
12  
13  
14  
15  
16  
17  
18  
19  
20  
21  
22  
23  
24  
25  
26  
27  
28  
29  
30  
31  
32  
33  
34  
35  
36  
37  
38  
39  
40  
41  
42  
43  
44  
45  
46  
47  
48  
49  
50  
51  
52  
53  
54  
55  
56  
57  
58  
59  
60

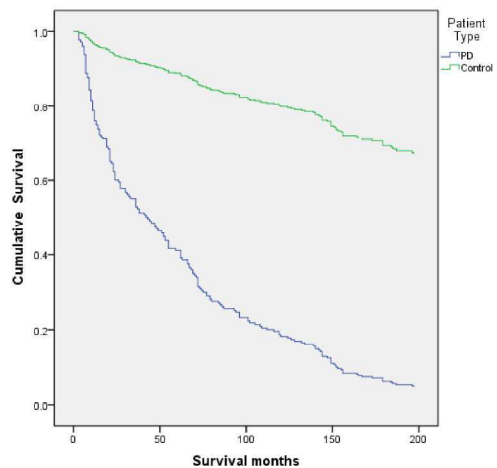

Figure 1.  
Kaplan-Meier survival curves for all cause mortality in the PD and control cohorts

297x420mm (300 x 300 DPI)

**STROBE 2007 (v4) checklist of items to be included in reports of observational studies in epidemiology\***  
**Checklist for cohort, case-control, and cross-sectional studies (combined)**

| Section/Topic             | Item # | Recommendation                                                                                                                                                                                                                                                                                                                                                                                                                                                         | Reported on page # |
|---------------------------|--------|------------------------------------------------------------------------------------------------------------------------------------------------------------------------------------------------------------------------------------------------------------------------------------------------------------------------------------------------------------------------------------------------------------------------------------------------------------------------|--------------------|
| Title and abstract        | 1      | (a) Indicate the study’s design with a commonly used term in the title or the abstract                                                                                                                                                                                                                                                                                                                                                                                 | 1                  |
|                           |        | (b) Provide in the abstract an informative and balanced summary of what was done and what was found                                                                                                                                                                                                                                                                                                                                                                    | 2                  |
| <b>Introduction</b>       |        |                                                                                                                                                                                                                                                                                                                                                                                                                                                                        |                    |
| Background/rationale      | 2      | Explain the scientific background and rationale for the investigation being reported                                                                                                                                                                                                                                                                                                                                                                                   | 3                  |
| Objectives                | 3      | State specific objectives, including any pre-specified hypotheses                                                                                                                                                                                                                                                                                                                                                                                                      | 3,4                |
| <b>Methods</b>            |        |                                                                                                                                                                                                                                                                                                                                                                                                                                                                        |                    |
| Study design              | 4      | Present key elements of study design early in the paper                                                                                                                                                                                                                                                                                                                                                                                                                | 4                  |
| Setting                   | 5      | Describe the setting, locations, and relevant dates, including periods of recruitment, exposure, follow-up, and data collection                                                                                                                                                                                                                                                                                                                                        | 4                  |
| Participants              | 6      | (a) <i>Cohort study</i> —Give the eligibility criteria, and the sources and methods of selection of participants. Describe methods of follow-up<br><i>Case-control study</i> —Give the eligibility criteria, and the sources and methods of case ascertainment and control selection. Give the rationale for the choice of cases and controls<br><i>Cross-sectional study</i> —Give the eligibility criteria, and the sources and methods of selection of participants | 4                  |
|                           |        | (b) <i>Cohort study</i> —For matched studies, give matching criteria and number of exposed and unexposed<br><i>Case-control study</i> —For matched studies, give matching criteria and the number of controls per case                                                                                                                                                                                                                                                 | 4                  |
| Variables                 | 7      | Clearly define all outcomes, exposures, predictors, potential confounders, and effect modifiers. Give diagnostic criteria, if applicable                                                                                                                                                                                                                                                                                                                               | 4                  |
| Data sources/ measurement | 8*     | For each variable of interest, give sources of data and details of methods of assessment (measurement). Describe comparability of assessment methods if there is more than one group                                                                                                                                                                                                                                                                                   | 4,5                |
| Bias                      | 9      | Describe any efforts to address potential sources of bias                                                                                                                                                                                                                                                                                                                                                                                                              | 5,6,8              |
| Study size                | 10     | Explain how the study size was arrived at                                                                                                                                                                                                                                                                                                                                                                                                                              | n/a                |
| Quantitative variables    | 11     | Explain how quantitative variables were handled in the analyses. If applicable, describe which groupings were chosen and why                                                                                                                                                                                                                                                                                                                                           | n/a                |
| Statistical methods       | 12     | (a) Describe all statistical methods, including those used to control for confounding                                                                                                                                                                                                                                                                                                                                                                                  | 5                  |
|                           |        | (b) Describe any methods used to examine subgroups and interactions                                                                                                                                                                                                                                                                                                                                                                                                    | 5                  |
|                           |        | (c) Explain how missing data were addressed                                                                                                                                                                                                                                                                                                                                                                                                                            | n/a                |
|                           |        | (d) <i>Cohort study</i> —If applicable, explain how loss to follow-up was addressed<br><i>Case-control study</i> —If applicable, explain how matching of cases and controls was addressed                                                                                                                                                                                                                                                                              | n/a                |

|                          |     |                                                                                                                                                                                                              |     |
|--------------------------|-----|--------------------------------------------------------------------------------------------------------------------------------------------------------------------------------------------------------------|-----|
|                          |     | <i>Cross-sectional study</i> —If applicable, describe analytical methods taking account of sampling strategy                                                                                                 |     |
|                          |     | (e) Describe any sensitivity analyses                                                                                                                                                                        | n/a |
| <b>Results</b>           |     |                                                                                                                                                                                                              |     |
| Participants             | 13* | (a) Report numbers of individuals at each stage of study—eg numbers potentially eligible, examined for eligibility, confirmed eligible, included in the study, completing follow-up, and analysed            | 5   |
|                          |     | (b) Give reasons for non-participation at each stage                                                                                                                                                         | n/a |
|                          |     | (c) Consider use of a flow diagram                                                                                                                                                                           | --  |
| Descriptive data         | 14* | (a) Give characteristics of study participants (eg demographic, clinical, social) and information on exposures and potential confounders                                                                     | 5   |
|                          |     | (b) Indicate number of participants with missing data for each variable of interest                                                                                                                          | n/a |
|                          |     | (c) <i>Cohort study</i> —Summarise follow-up time (eg, average and total amount)                                                                                                                             | 5,6 |
| Outcome data             | 15* | <i>Cohort study</i> —Report numbers of outcome events or summary measures over time                                                                                                                          | 5,6 |
|                          |     | <i>Case-control study</i> —Report numbers in each exposure category, or summary measures of exposure                                                                                                         | 5,6 |
|                          |     | <i>Cross-sectional study</i> —Report numbers of outcome events or summary measures                                                                                                                           | --  |
| Main results             | 16  | (a) Give unadjusted estimates and, if applicable, confounder-adjusted estimates and their precision (eg, 95% confidence interval). Make clear which confounders were adjusted for and why they were included | 5,6 |
|                          |     | (b) Report category boundaries when continuous variables were categorized                                                                                                                                    | 5,6 |
|                          |     | (c) If relevant, consider translating estimates of relative risk into absolute risk for a meaningful time period                                                                                             | 5,6 |
| Other analyses           | 17  | Report other analyses done—eg analyses of subgroups and interactions, and sensitivity analyses                                                                                                               | 5,6 |
| <b>Discussion</b>        |     |                                                                                                                                                                                                              |     |
| Key results              | 18  | Summarise key results with reference to study objectives                                                                                                                                                     | 6   |
| Limitations              | 19  | Discuss limitations of the study, taking into account sources of potential bias or imprecision. Discuss both direction and magnitude of any potential bias                                                   | 8   |
| Interpretation           | 20  | Give a cautious overall interpretation of results considering objectives, limitations, multiplicity of analyses, results from similar studies, and other relevant evidence                                   | 8   |
| Generalisability         | 21  | Discuss the generalisability (external validity) of the study results                                                                                                                                        | 6-8 |
| <b>Other information</b> |     |                                                                                                                                                                                                              |     |
| Funding                  | 22  | Give the source of funding and the role of the funders for the present study and, if applicable, for the original study on which the present article is based                                                | 9   |

\*Give information separately for cases and controls in case-control studies and, if applicable, for exposed and unexposed groups in cohort and cross-sectional studies.

**Note:** An Explanation and Elaboration article discusses each checklist item and gives methodological background and published examples of transparent reporting. The STROBE checklist is best used in conjunction with this article (freely available on the Web sites of PLoS Medicine at <http://www.plosmedicine.org/>, Annals of Internal Medicine at <http://www.annals.org/>, and Epidemiology at <http://www.epidem.com/>). Information on the STROBE Initiative is available at [www.strobe-statement.org](http://www.strobe-statement.org).



# BMJ Open

## Mortality and the quality of death certification in a cohort of Parkinson's disease patients and matched controls in North Wales, United Kingdom at 18-years: a community based cohort study.

|                                 |                                                                                       |
|---------------------------------|---------------------------------------------------------------------------------------|
| Journal:                        | <i>BMJ Open</i>                                                                       |
| Manuscript ID                   | bmjopen-2017-018969.R3                                                                |
| Article Type:                   | Research                                                                              |
| Date Submitted by the Author:   | 20-Dec-2017                                                                           |
| Complete List of Authors:       | Hobson, Peter; Academic Unit<br>Meara, Jolyon; Academic Unit                          |
| <b>Primary Subject Heading</b>: | Neurology                                                                             |
| Secondary Subject Heading:      | Epidemiology, Neurology                                                               |
| Keywords:                       | Parkinson-s disease < NEUROLOGY, Mortality, Death certification, Dementia < NEUROLOGY |
|                                 |                                                                                       |

SCHOLARONE™  
Manuscripts

1  
2  
3 Mortality and the quality of death certification in a cohort of  
4 Parkinson's disease patients and matched controls in North Wales,  
5 United Kingdom at 18-years: a community based cohort study.  
6

7  
8 Peter Hobson<sup>1</sup>, Jolyon Meara<sup>1</sup>  
9

10 <sup>1</sup>Academic Unit,  
11 Betsi Cadwaladr University Health Board,  
12 Glan Clwyd Hospital,  
13 Rhyl, United Kingdom  
14

15 Correspondence to:  
16 Dr Peter Hobson; peter.hobson@wales.nhs.uk  
17

18 Academic Unit,  
19 Betsi Cadwaladr University Health Board  
20 Glan Clwyd Hospital,  
21 Sarn Lane,  
22 Bodelwyddan,  
23 LL18 5UJ, United Kingdom  
24 Ph: +44 1745 448788  
25

26 Keywords:  
27 Parkinson's disease, Mortality, Death certification, Dementia  
28

29 Word count: 3685  
30  
31  
32  
33  
34  
35  
36  
37  
38  
39  
40  
41  
42  
43  
44  
45  
46  
47  
48  
49  
50  
51  
52  
53  
54  
55  
56  
57  
58  
59  
60

## Abstract

**Objective:** This investigation reports the cause and the quality of death certification in a community cohort of Parkinson's disease (PD) patients and controls at 18 years.

**Setting:** Denbighshire North Wales United Kingdom (UK).

**Participants:** The community based cohorts consisted of 166 PD and 102 matched controls.

**Primary outcomes:** All-cause mortality was ascertained at 18-years by review of hospital, primary care records and examination of death certificates obtained from the UK General Register Office. Mortality Hazard Ratios were estimated using Cox proportional regression controlling for covariates including, age at study entry, age at death, gender, motor function, mood, health related quality of life (HRQoL), and cognitive function.

**Results:** After 18-years, 158(95%) of the PD cohort and 34(33%) of the control cohort had died. Compared to the general UK population, the PD cohort had a higher risk of mortality (standard mortality rate, 1.82, 95% CI: 1.55 – 2.13). As the primary or underlying cause of death, PD was not reported in 75/158 (47%) of the death certificates. In addition, although 144/158 (91%) of the PD cohort had a diagnosis of dementia, this was reported in less than 10% of death certificates. The main cause of death reported in the PD cohort was pneumonia (53%), followed by cardiac related deaths (21%). Compared to controls, PD patients had a greater risk of pneumonia (2.03, 95% CI, 1.34-3.6), poorer HRQoL and more likely to reside in institutional care at death ( $p < 0.01$ ).

**Conclusion:** This investigation found that PD was associated with an excess risk of mortality compared to the general population. However, PD as a primary or underlying cause of death recorded on certificates was found to be suboptimal. This suggests that the quality of mortality statistics drawn from death certificates alone is not a valid or reliable source of data.

## Strengths and limitations

- Community based longitudinal follow-up cohort design.
- All patients fulfilled diagnostic criteria for Parkinson's disease and or dementia.
- Baseline and subsequent repeat measure data capture allowed analysis for predictive outcomes.
- The cohort included prevalent and new cases Parkinson's disease. Although the varying disease duration of the Parkinson's disease cohort is a possible source of bias, we found no differences between the two groups survival.
- The control cohort included subjects without known neurological conditions and thus may have intruded bias in the outcome comparisons with the Parkinson's disease patients.

## Introduction

Data drawn from death certificates is often employed by epidemiological, public health and research scientists to capture the incidence, prevalence and mortality in populations. In addition, these statistics are often utilized in the evaluation of public health interventions, setting priorities for medical research and health services, the planning of health services, and the clinical assessment of the effectiveness of those services. [1-3] The introduction of the revised International Classification of Diseases (ICD) system in 2001 aim was to improve the accuracy in the reported cause of death, where underlying conditions, mentioned in Part 1 or 2 of death certification take priority over others. [4,5] The underlying principle for this is that reporting of multiple causes of death should provide a better description of a particular disease or condition, allowing for more effective and meaningful data capture. The reliability of statistical information extracted from death certificates remains uncertain, where for example, rather than the underlying chronic condition being reported, a secondary cause of death is often reported as the main cause of death. [6-14]

The projected elderly population demographic changes worldwide, along with exponential rises in chronic conditions will most likely place greater social and fiscal demands upon existing clinical, health and social services. [15] To ensure that mortality and survival rates are more precisely captured for these chronic conditions, the relative contributions different diseases have upon survival and mortality need to be more accurately measured. The challenge is to ensure that any statistical collected is valid and reliable enough to allow for more efficient planning for healthcare services and clinical interventions. Parkinson's disease (PD) is a progressive neurodegenerative disease strongly associated with increased mortality and lower life expectancy than the general population. [16] In addition to the motor symptoms of PD, many patients often live with a significant number of other non-motor conditions, which contribute, to the symptomatology of the disease. [17-22] In particular, dementia occurs frequently in the elderly PD patient and has been shown to be a strong predictor for increased mortality. [23-33] This most probably has implications for the quality of death certification, which in previous investigations has been found to be inconsistent, under recorded or an inaccurate record of the cause of death in patients. [16,34-38] The methodological design of previous investigations, where cohorts have been drawn from clinical populations or pharmaceutical trails alone may partially explain the variability between studies.[39-40] Only a small number of investigations have employed prospective community study methods to ascertain the utility of death certification in PD, and furthermore few have included a comparison control group.

This investigation is a report of the outcomes from a community cohort of PD patient and controls (without neurological disease) who have been regularly followed over the past 18 years in the county of Denbighshire in the United Kingdom. It aims firstly to examine the reported cause and quality of death certification in these cohorts. Secondly, it will explore if PD and or dementia are

1  
2  
3 reported as a cause or underlying cause of death on certificates.  
4 Thirdly, the demographic, motor and non-motor symptoms of PD  
5 will be explored to establish if they are associated or predictive with  
6 an increased risk of mortality.

## 7 8 **Methods**

### 9 10 **Subjects**

11 The patient and control recruitment methodology has been  
12 described in greater depth in previous reports [25,41]. In brief,  
13 between December 1994 and January 1997, employing multiple  
14 sources of ascertainment we recruited newly diagnosed PD  
15 patients and patients with an existing diagnosis of probable PD  
16 based upon the UKPDS brain bank criteria. [42] General  
17 practitioner (GP) records (n=74) in a defined Area of North Wales  
18 (Denbighshire), were employed to identify individuals in receipt of a  
19 defined group of anti-parkinsonian drugs, which included  
20 Levodopa, monomine-oxidase-B inhibitors, dopamine agonists and  
21 anti-muscarinic drugs. Additionally, hospital records were examined  
22 and patients who were not on active but known to medical services  
23 were also ascertained. In total, 402 patients were identified, of  
24 whom 213 fulfilled criteria for clinically probable PD patients (n=  
25 213). Of the original PD cohort, 25 died before they could be  
26 consented into the investigation, 13 withdrew consent and the  
27 remaining patients (n = 9) were lost to follow-up. This left at study  
28 entry 166 probable PD patients for follow-up from December 1997  
29 to January 2015.

31 The control cohort was randomly drawn from two GP practices  
32 within the same geographical area of the PD cohort within the  
33 same time frame. The controls were matched for sex and age to  
34 PD patients ( $\pm$  3 years), were not known to have a diagnosis of  
35 clinically probable PD, parkinsonism, Alzheimer's or other  
36 dementia, stroke, neurological disorder, not in receipt of  
37 psychoactive drugs and did not have a known psychiatric, alcohol  
38 or substance abuse history. One hundred and sixty four controls  
39 were invited to participate in the study, of whom 42 subsequently  
40 declined to participate and a further six withdrew consent at a later  
41 date. Upon initial baseline screening, eight were found to have  
42 previously suffered from a stroke, two had signs of parkinsonism  
43 and four fulfilled criteria for dementia and were excluded from  
44 further analysis, leaving a cohort of 102 control subjects.

### 45 46 **Clinical assessment.**

47 The PD and control cohorts demographic details were recorded  
48 which included, age, gender, educational attainment, social class,  
49 and smoking history. In addition to the demographic details, PD  
50 specific variables were also recorded which included, age of  
51 diagnosis, duration of symptoms, Hoehn and Yahr staging (H&Y),  
52 the UPDRS motor subsection, the 15-item Geriatric Depression  
53 Scale (GDS -15), the Cambridge Examination for Mental Disorders  
54 of the Elderly (CAMDEX), section B (CAMCOG), the Parkinson's  
55 disease Activities of Daily Living Scale (PADL) and the health  
56  
57  
58  
59

1  
2  
3 related quality of life (HRQoL) measure the EQ5-D. [43-47] These  
4 measures were reassessed at approximately two yearly intervals  
5 from the midpoint of the recruitment phase of the cohort assembly.  
6 Diagnosis of PD based upon UKPDBB criteria was reassessed  
7 (RJM) at review to ensure diagnostic accuracy was maintained.  
8 The control cohort screening was also carried out approximately  
9 every two years from study entry, which included review and  
10 updating of demographic variables, and reassessment with the  
11 GDS-15, CAMCOG, and EQ5-D. Analysis of the clinical  
12 assessments was the most recent prior to a subjects reported  
13 death. The diagnosis of dementia for PD and controls was based  
14 upon neuropsychological assessment, patient, and carer/informant  
15 interviews, along with the application of the Diagnostic and  
16 Statistical Manual of Mental disorders fourth edition criteria. [48]  
17

### 18 **Death certification collection and evaluation.**

19  
20 Review of hospital and primary care records were employed to  
21 ascertain the number of individuals who were deceased. All of the  
22 death certificates in this investigation were obtained from the local  
23 Births, Deaths, and Marriages central record office for the PD and  
24 control cohorts. Primary and underlying cause of death, along with  
25 the age of the subject and the age of death are recorded on all  
26 certificates in the UK. In addition, all certificates completed by a  
27 doctor within the UK and are coded using the ICD-10 system as  
28 follows:

29 Ia: Disease or condition leading directly to death.  
30 I(b): Other disease or condition, if any, leading to I(a).  
31 I(c): Other disease or condition, if any, leading to I(b)  
32 II: Other significant conditions that contributing to death but not  
33 related to the disease or condition causing it.  
34

35 From the information recorded on the death certificates, we  
36 grouped primary and underlying causes of death in to nine further  
37 categories which were, PD, Sepsis, Dementia, Cerebrovascular,  
38 Cardiac, Cancer, Pneumonia, Chronic lung disease, other  
39 disorders.  
40

### 41 **Ethical approval:**

42 This study was approved by the North Wales Research and ethics  
43 committee (Central).  
44

### 45 **Statistics.**

46  
47 The age and gender specific standardized mortality ratios (SMR)  
48 were calculated by dividing the observed deaths in each cohort by  
49 expected numbers of deaths. This is calculated by multiplication of  
50 the numbers of person's-years for each 5-year age group, gender  
51 and year by the corresponding general population age group,  
52 gender and year, drawn from the UK Office of National Statistics  
53 interim life tables 2016.  
54

55 Descriptive statistics (mean, SD, median) were used for continuous  
56 variables, whereas categorical variables were described as  
57  
58  
59

percentages of subjects in each group. Student t-tests, the chi-square test, and Univariate logrank statistics were employed to examine between-group differences and between observed and expected survival curves. The Relative Risk (RR) was calculated by dividing the probability of an event occurring for PD cohort, divided by the probability of an event occurring for the control cohort. The survival time of subjects was calculated from the date of baseline examination for each subject. The Kaplan-Meier estimates were used to calculate the observed survival curves. Cox proportional hazards (PH) analysis was used to investigate the effect of several variables upon the time a specified event takes to happen. To satisfy the assumptions for the PH modelling, visual inspections of the Kaplan-Meier curves were made. The Cox PH modelling was also employed to calculate the hazard ratio's (HR) and the 95% confidence intervals (CIs) for differences between groups defined by demographic and clinical features defined at baseline. The PH model covariates act as factors multiplying the (HR), which is the probability of experiencing the event, which in this study is death. Covariates included in the PH model included, age at study entry, age at death, gender, motor function, mood, HRQoL, and cognitive function. The Hazard Ratio (HR) reported in this study provides an estimate of the relative risk.

All data were analysed with the SPSS statistical package version 19 and the RR and 95% CIs were calculated using the Altman formula and MedCalc software. [49-51] The level of significance was set at as  $p < 0.05$ .

## Results

From baseline to the study end date (30/01/2015), 158/166 (96%) of the PD and 34/102 (33%) of the control cohorts were decedents. In Table 1 the demographic and clinical outcomes of the PD and control cohorts are shown. Figure 1 illustrates the Kaplan-Meier survival curves for all cause mortality in the PD and control cohorts. The SMR for the whole PD cohort was 1.82 (95% CI: 1.55 – 2.13). A sub group analysis between new cases of PD ( $n = 80$ ) identified during the cases ascertainment phase of the investigation and existing cases of PD ( $n = 78$ ) revealed no excess mortality between the groups ( $p = 0.186$ ) despite the varying disease duration. By 18 years the cumulative survival in the PD cohort (figure 1), was approximately 5% and 67% in the control cohort. The mortality risk controlled for age and gender was significantly higher risk in the PD cohort (HR 7.89,  $p = 0.0001$ ). Older age at entry into the current study was predictive of an increased risk of mortality in both cohorts (PD: HR 1.06,  $p = 0.0001$ ; Control: HR 1.09,  $p = 0.009$ ). There were no statistical differences found between the PD and control cohorts age at death (PD cohort 80.7 (7.1), Control cohort 81.9(6.3);  $p = 0.552$ ). The strongest predictor associated with mortality in the PD cohort after controlling for age and gender was worsening motor symptoms (HR 1.06,  $p < 0.01$ ).

As a primary cause of death (Part 1a on UK death certificates), PD was recorded in just over 4% of the cohort. In sections 1b and 1c (conditions substantially contributing to death), PD was reported in



1  
2  
3 24% and 6% of cases respectively. In Section II of the death  
4 certificates (co-morbid conditions substantially contributing to  
5 death); PD was reported in 19% of cases. Overall, PD as a  
6 contributing factor in the cause of death, was not reported  
7 anywhere on 75/158 (47%) of the PD cohort's certificates. The  
8 primary cause of death for the PD and control cohorts is given in  
9 Table 2 . The most common causes of death reported within the  
10 PD cohort were pneumonia (53%), followed by cardiac related  
11 deaths (21%). The most frequently recorded cause of death within  
12 the control cohort was cardiac disease (26%), cancer (24%), and  
13 pneumonia (18%). A comparison between the PD and Control  
14 cohorts revealed that the PD cohort were nearly three times more  
15 likely to have pneumonia recorded as a primary cause of death  
16 (RR, 2.94, 95% CI 1.40-6.19). Controlling for patients and controls  
17 with dementia still revealed a higher risk of mortality in PD for  
18 pneumonia (RR, 2.03, 95% CI 1.34-3.6). The controls compared to  
19 the PD cohort had over a threefold increased risk of having a  
20 cancer related disorder recorded as a primary or underlying cause  
21 of death (RR, 3.72, 95% CI 1.58 -8.72). Examining the smoking  
22 history between the two cohorts found no significant differences  
23 with the frequency of current or former smokers ( $p = 0.39$ ), nor  
24 were differences in cancer risk observed between the PD and  
25 controls cohorts who never smoked ( $p = 0.75$ ). However,  
26 significantly more of the controls who were smokers prior to their  
27 death had cancer recorded as a primary or secondary cause of  
28 death ( $p < 0.025$ ).

29  
30 Disease progression within the PD cohort was significantly  
31 associated with a worsening HRQoL at death ( $p < 0.0001$ ). When  
32 compared to the controls, HRQoL was significantly poorer for the  
33 PD cohort ( $p < 0.001$ ). At the time of death, 83/158 (52%) of the PD  
34 and 9/34 (26%) of the control cohorts were living in institutional  
35 care ( $p < 0.003$ ). Overall, the PD cohort decedents had a threefold  
36 increased probability to be living in institutional care at death (RR  
37 3.23, 95% CI 1.4-7.41). Controlling for age and duration of illness,  
38 the PD cohort living in institutional were also more likely to be  
39 demented (RR 2.7 (95% CI 1.21- 5.76). In contrast to the PD  
40 cohort, the control decedent's place of death was more likely to be  
41 in hospital (RR, 1.97, 1.48-2.62).

42  
43 As a primary or underlying cause of death, dementia was  
44 underreported on both the PD and control certificates. Although  
45 144/158 (91%) of the PD cohort had a diagnosis of dementia  
46 before their deaths, it was reported in only 14/144 of certificates.  
47 Similarly, only two of the control cohort had dementia recorded  
48 anywhere as a primary or underlying cause of death. Upon review  
49 however, a further four at the time of death had a confirmed  
50 diagnosis of dementia.

## Discussion.

This investigation reports the cause of death recorded on the death certificates of PD and age matched control cohorts in Denbighshire in the UK. We have previously reported that the life expectancy and average age at death in this PD cohort is much lower than the general population. [16] In the current study the overall SMR for our PD cohort was 1.82, indicating an excess mortality. This is similar to previous investigations where the SMR has been reported to range from 0.9 to 3.8 [16] However, recent community based incident cohort and incident clinical cohort investigations have reported lower SMR's of 1.29 (95% CI, 0.97-1.61), and 1.39 (95% CI, 1.10.-1.50), suggesting a moderate increase mortality compared to the general population. [16,52] The shorter duration of PD diagnosis, lower number of recorded deaths and shorter follow-up period compared with the current investigation may partially explain these differences the current and previously reported UK investigation. In addition, the other European investigation was limited by the retrospective analysis of a data set from 1978-1998 and recruitment solely from a clinical population.

Overall death certification and clinical research data appear to provide disparate mortality data in PD. Although our PD cohort had confirmed UKPDSBB criteria for probable PD, as a primary cause of death (Part 1a), it was recorded in just in over 4% of the cohort. A further 30% had PD recorded in parts 1b and c of their death certificates, and on Part II of certificates it was recorded in a further 19% of cases. Overall, PD was not cited anywhere on 47% of the death certificates, which falls approximately midway with previous certification studies of between 14–70%. [16,34-38] The disparity reported between studies is most likely evidence of the differing methodologies employed such as, populations drawn from pharmaceutical trials alone, clinical samples, or retrospective case or chart record analysis.

Pneumonia was the most cited primary cause of death (52%), in the current study. This observation has also been frequently reported in other investigations. [16,52] Patients with PD, particularly as they become frailer with the progression of their illness, are at greater risk for pulmonary complications, due to obstructive ventilation dysfunction, upper airway dysfunction, and weakened strength of respiratory muscles. [53-55] The most frequently reported other causes of death were cardiovascular disease (21%), cerebrovascular disease (8%) and malignancy (6%).

This is the first study to our knowledge to describe underreporting of dementia as a primary, or underlying cause of death in a community based PD cohort. We have previously reported in this cohort the high prevalence of dementia of around 90%. [56] Upon review of the decedents death certificates, we found that less than 10% had any mention of dementia as an immediate or underlying cause of death. Previous general population investigations have also shown that rates of certification mentioning dementia as a main or underlying cause of death have been consistently under

1  
2  
3 reported. [57-61] This perhaps is because death certification tends  
4 to focus upon the immediate cause of death and does not really  
5 capture the multiple factors that contribute to death, particularly  
6 with elderly individuals with multiple co-morbidity.  
7

8 This investigation found that the PD cohort were more likely than  
9 the controls to be living in a long term care setting before death.  
10 This may be a reflection of the duration, nature and the type of  
11 burden PD places upon relatives, especially those who have  
12 physical frailty themselves. Caring within the home setting may  
13 therefore become impracticable and thus possibly precipitates entry  
14 into institutional care. The proportion of deaths in long term care  
15 amongst the PD cohort was also significantly higher than the  
16 control cohort. A recent study reported wide variations in the place  
17 of death of people with PD throughout the world, concluding that  
18 individual preference, social and socioeconomic circumstances;  
19 cultural, organisation and provision of health and palliative care all  
20 contribute to some extent the place of death. [62]  
21

22 In common with previous mortality investigations, we found fewer  
23 recorded cancer deaths within the PD cohort. [63] We did not  
24 observe differences in the current or past smoking history  
25 frequency between our cohorts. Similarly, no differences were  
26 revealed between the cohorts and cancer risk in those who had  
27 never smoked. There were no differences seen in the types of  
28 cancer type on death certificates compared to smokers and non-  
29 smokers. However, in the current smoker groups, significantly more  
30 in cancer associated deaths were recorded in the controls  
31 compared to the PD cohort. A possible explanation for this disparity  
32 may be that mutations of the PARK2 (Parkin) gene found in 6-8%  
33 of PD patients, may act in some cancers as a tumour suppressor  
34 proteins. [64] The absence or mutation of the Parkin gene is found  
35 in several tumour types, suggesting that the mechanisms of cell  
36 death in PD may play a role in the inhibition or formation of some  
37 cancers. [64,65] The decreased risk of mortality from cancer has  
38 also been reported in other neurodegenerative disease including  
39 Alzheimer's, Huntington's disease and in populations where mild to  
40 moderate with cognitive impairment has also been observed. [66-  
41 69] Further studies are needed to explore the associations, risks,  
42 possible genetic markers and underlying mechanisms in PD and  
43 other neurodegenerative conditions, to improve and identify and  
44 understand the role of cell death and its decreased cancer risk.  
45

46 We would caution the message often given to PD patients that they  
47 die with, rather than die of the condition. The non-motor features of  
48 PD such as dementia and autonomic dysfunction are frequently  
49 observed in all stages of the disease and most likely make a  
50 significant contribution to mortality.[70] One recent investigation  
51 reported that autonomic dysfunction and dementia in PD was  
52 predictive of increased mortality particularly in patients with  
53 orthostatic hypotension (OH).[71] Another meta-analysis which  
54 explored the association with OH and mortality in general  
55 populations also concluded that OH may confer a greater risk (RR,  
56 1.40) for mortality. [72] The association between the non-motor  
57  
58  
59  
60

1  
2  
3 features of PD disease and mortality needs further research to  
4 understand and determine if these are causal or not.  
5  
6

7 This study's strengths are the robust follow-up over an 18-year  
8 period of a community based cohort all of whom fulfilled criteria for  
9 PD and diagnostic re-evaluation was reviewed regularly over this  
10 period to ensure diagnostic accuracy. The repeat measure design  
11 of the study also allowed us to control for demographics, and motor  
12 and non-motor symptomatology. The limitations of the study are  
13 that the PD cohort had a mix of prevalent and incident cases, thus  
14 possibly over estimating the possible causal associations with  
15 mortality. However, controlling for prevalent and incident cases in  
16 our analysis did not reveal any between group significant  
17 differences. Our control cohort was selected carefully in terms of  
18 age, gender, and disease exposure and may not representative of  
19 the general population. We endeavoured to reduce this potential  
20 bias by randomly selecting controls from general practitioner lists  
21 within defined catchment area as the PD cohort. However,  
22 excluding controls with known neurological, psychiatric illness and  
23 possibly healthier general health may be a potential source of error.  
24 The ideal comparison group in a cohort study would be the same  
25 as the cohort of interest, except that they would not have the  
26 condition under investigation. In older populations, the selection of  
27 any control group is often a compromise in ensuring that the control  
28 group differs enough with respect to the condition of interest, yet  
29 are similar as possible to explore what other factors influence the  
30 outcome under investigation. We believe that our selection of  
31 controls without neurological or psychiatric disease allowed us to  
32 control for confounding factors in the analysis in both cohorts that  
33 would not have been possible in the general population.  
34

### 35 **Conclusions.**

36  
37 In light of our findings, we feel that the current methods of capturing  
38 the cause of death from certification alone significantly  
39 underestimate the true population burden of PD. The under  
40 reporting of dementia as an underling cause of death in this cohort  
41 in addition to PD, also suggests that the interpretation of and  
42 quality of mortality data currently is not a valid or reliable source of  
43 data. Furthermore, we would admonish the use of mortality  
44 statistics alone to plan for future service provision in this patient  
45 population.  
46  
47  
48  
49  
50  
51  
52  
53  
54  
55  
56  
57  
58  
59  
60

## References

1. Devis T, Rooney C. Death certification and the epidemiologist. *Health Statistics Quarterly* 1999;**1**: 21–33.
2. Hanzlick R. Cause of Death and the Death Certificate: Important Information for Physicians, Coroners, Medical Examiners, and the Public. Northfield, IL: College of American Pathologists; 2006.
3. World Health Organisation. International Classification of Diseases and Related health problems. Geneva: WHO; 1992. Tenth Revision.
4. Rooney C, Smith S. Implementation of ICD-10 for mortality data in England and Wales from January 2001. *Health Statistics Quarterly* 2000;**8**:41–50.
5. Rooney C, Griffiths C, Cook L. Implementation of ICD-10 for cause of death coding – some preliminary results from the bridge coding stud. *Health Statistics Quarterly* 2002;**13**:31–41.
6. Neilsen GP, Björnsson J, Jonasson JG. The accuracy of death certificates. Implications for health statistics. *Virchows Arch A Pathol Anat Histopathol* 1991;**419**:143–6.
7. Sington JD, Cottrell BJ. Analysis of the sensitivity of death certificates in 440 hospital deaths: a comparison with necropsy findings. *J Clin Pathol* 2002;**55**:499–502.
8. Nashelesky MB, Lawrence CH. Accuracy of cause of death determination without forensic autopsy examination. *Am J Forensic Med Pathol* 2003;**24**:313–9.
9. Smith Sehdev AE, Hutchins GM. Problems with proper completion and accuracy of the cause-of-death statement. *Arch Intern Med* 2001;**161**:277–84.
10. Shibuya K, Scheele S, Boerma T. Health statistics: time to get serious. *Bull World Health Organ* 2005;**83**:722.
11. Cambridge B, Cina SJ. The accuracy of death certificate completion in a suburban community. *Am J Forensic Med Pathol* 2010;**31**:232–5.
12. Lu TH, Anderson RN, Kawachi I. Trends in frequency of reporting improper diabetes-related cause-of-death statements on death certificates, 1985–2005: An algorithm to identify incorrect causal sequences. *Am J Epidemiol* 2010;**171**:1069–78.
13. Drummond, MB, Wise, RA, John, M, *et al*. Accuracy of Death Certificates in COPD: Analysis from the TORCH Trial. *COPD: Journal of Chronic Obstructive Pulmonary Disease* 2010;**7**:179–185.
14. Rampatige R, Mikkelsen L, Hernandez B, *et al*. Systematic review of statistics on causes of deaths in hospitals: strengthening the evidence for policy-makers. *Bull World Health Organ* 2014;**92**:807–16.
15. World Health Organization. World Report on Ageing and Health 2015. Geneva: WHO.
16. Macleod AD, Taylor KS, Counsell CE. Mortality in Parkinson's disease: a systematic review and meta-analysis. *Mov Disord* 2014;**29**:1615–22.



17. Hobson P, Islam W, Roberts S, *et al*. The risk of bladder and autonomic dysfunction in a community cohort of Parkinson's disease patients and normal controls. *Parkinsonism Relat Disord* 2003;**10**:67-71.
18. Hely MA, Morris J.G.L, Reid WGJ, *et al*. Sydney Multicenter Study of Parkinson's disease: Non-L-Dopa-Responsive Problems Dominate at 15 years. *Mov Disord* 2005;**20**:190-9.
19. Weerkamp NJ1, Tissingh G, Poels PJ, *et al*. Nonmotor symptoms in nursing home residents with Parkinson's disease: prevalence and effect on quality of life. *J Am Geriatr Soc* 2013;**61**:1714-21.
20. Storch A, Schneider CB, Wolz M, *et al*. Nonmotor fluctuations in Parkinson disease: severity and correlation with motor complications. *Neurology* 2013;**80**:800-9.
21. Marras C, Chaudhuri KR. Nonmotor features of Parkinson's disease subtypes. *Mov Disord* 2016;**31**:1095-02.
22. Anthony HV, Schapira AHV, Chaudhuri KR, *et al*. Non-motor features of Parkinson disease. *Nature Reviews Neuroscience* 2017;**18**:435-50.
23. Aarsland D, Andersen K, Larsen JP, *et al*. Risk of Dementia in Parkinson's disease. A community-based, prospective study. *Neurology* 2001;**56**: 730-6.
24. Foltynie T, Brayne CE, Robbins TW, *et al*. The cognitive ability of an incident cohort of Parkinson's patients in the UK. The CamPaIGN study. *Brain* 2004;**127**:550-60.
25. Hobson JP, Meara RJ. The risk and incidence of dementia in a cohort of older subjects with Parkinson's disease in the UK. *Mov Disord* 2004;**19**:1043-49.
26. Hely MA, Reid WGJ, Adena MA, *et al*. The Sydney Multicentre Study of Parkinson's disease: The Inevitability of Dementia at 20 years. *Mov Disord* 2008;**26**:837-44.
27. Williams-Gray CH, Evans JR, *et al*. The distinct cognitive syndromes of Parkinson's disease: 5 year follow-up of the CamPaIGN cohort. *Brain* 2009;**132**:2958-69.
28. Williams-Gray CH, Foltynie T, Brayne CE, *et al*. Evolution of cognitive dysfunction in an incident Parkinson's disease cohort. *Brain* 2007;**130**:1787-98.
29. Nussbaum M, Treves R, Inzelberg JM, *et al*. Survival in Parkinson's disease: the effect of dementia. *Parkinsonism Relat Disord* 1998;**4**:179-81.
30. Levy G, Tang M-X, Louis ED, *et al*. The association of incident dementia with mortality in PD. *Neurology* 2002;**59**:1708-13.
31. Hughes TA, Ross HF, Mindman RHS, *et al*. Mortality in Parkinson's disease and its association with dementia and depression. *Acta Neurol Scand* 2004;**110**:118-123.
32. de Lau LM, Schipper MA, Hofman A, Koudstaal PJ, Bretler MMB. Prognosis of Parkinson's disease: Risk of Dementia and Mortality: The Rotterdam study. *Arc Neurol* 2005;**62**:1265-69.
33. Buter TC, van den Hout A, Matthews FE, *et al*. Dementia and survival in Parkinson's disease: A 12-year population study. *Neurology* 2008;**70**:1017-22.

- 1
- 2
- 3 34. Paulson GW, Gill WM. Are death certificates reliable to
- 4 estimate the incidence of Parkinson's disease? *Mov Disord*
- 5 1995;**53**:587-8.
- 6 35. Phillips NJ, Reay J, Martyn CN. Validity of mortality data for
- 7 Parkinson's disease. *J Epidemiol Community Health*
- 8 1999;**53**:587-88.
- 9 36. Pressley JC, Tang MX, Marder K, *et al.* Disparities in the
- 10 recording of Parkinson's disease on death certificates. *Mov*
- 11 *Disord* 2005;**20**(3): 315–321.
- 12 37. Benito-León J, Louis ED, Villarejo-Galende A, *et al.* Under-
- 13 reporting of Parkinson's disease on death certificates: A
- 14 population-based study (NEDICES). *Journal of the*
- 15 *Neurological Sciences* 2014;**347**:188-92.
- 16 38. Donnan PT, Steinke DT, Stubbings C, *et al.* Selegiline and
- 17 mortality in subjects with Parkinson's disease: A longitudinal
- 18 community study. *Neurology* 2000;**55**:1785-9.
- 19 39. Marras C, McDermott, Rochon PA, *et al.* Survival in
- 20 Parkinson disease; Thirteen-year follow-up of the
- 21 DATATOP cohort. *Neurology* 2005;**64**:87-93.
- 22 40. Chen H, Zhang SM, Schwarzschild MA, *et al.* Survival of
- 23 Parkinson's Disease in a Large Prospective cohort of male
- 24 Health Professionals. *Mov Disord* 2006;**27**:1002-7.
- 25 41. Meara RJ, Bhowmick BK, Hobson JP. Accuracy of
- 26 diagnosis in patients with presumed Parkinson's disease in
- 27 a community based disease register. *Age Ageing* 1999;**28**:
- 28 99-02.
- 29 42. Gibb WRG, Lees AJ. The relevance of the Lewy body to the
- 30 pathogenesis of idiopathic Parkinson's disease. *J Neurol*
- 31 *Neurosurg Psychiatry* 1998;**51**:745-52.
- 32 43. Fahn S, Elton RL, and Members of the UPDRS
- 33 Development Committee. Unified Parkinson's Disease
- 34 Rating Scale. In: Fahn S, Marsden CD, Calne DB, Goldstein
- 35 M eds. Recent developments in Parkinson's disease,
- 36 Volume 2. Florham Park, NJ: Macmillan Health Care
- 37 Information, 1987:153–64.
- 38 44. Sheikh JI, Yesavage JA. Geriatric Depression Scale (GDS).
- 39 Recent evidence and development of a shorter
- 40 version. in: T.L. Brink (Ed.) *Clinical gerontology: A guide to*
- 41 *assessment and intervention.* The Haworth Press, Inc., New
- 42 York; 1986:165–73.
- 43 45. Roth M, Tym E, Mountjoy CQ, Huppert FA, *et al.* CAMDEX.
- 44 A standardised instrument for the diagnosis of mental
- 45 disorder in the elderly with special reference to the early
- 46 detection of dementia. *Br J Psychiatry* 1986;**149**:698-09.
- 47 46. Hobson JP, Edwards N, Meara RJ. The Parkinson's
- 48 Disease Activities of Daily Living scale: A new simple and
- 49 brief subjective measure of disability in Parkinson's disease.
- 50 *Clin Rehabil* 2001;**15**:241-46
- 51 47. Williams, A. EuroQol - A new facility for the measurement of
- 52 health-related quality of life. *Health Policy* 1990;**16**:199-
- 53 208.
- 54 48. American Psychiatric Association. (2000). *Diagnostic and*
- 55 *statistical manual of mental disorders (4th ed., text rev.).*
- 56 Washington, DC: Author.
- 57
- 58
- 59
- 60



- 1
- 2
- 3 49. IBM Corp. Released 2010. IBM SPSS Statistics for
- 4 Windows, Version 19.0. Armonk, NY: IBM Corp.
- 5 50. Altman DG (1991) Practical statistics for medical research.
- 6 London: Chapman and Hall.
- 7 51. MedCalc for Windows, version 15.0 (MedCalc Software,
- 8 Ostend, Belgium)
- 9 52. Duarte J, García Olmos LM, Mendoza A, *et al.* The natural
- 10 history of Parkinson's disease in the province of Segovia:
- 11 mortality in a longitudinal study (20-year follow-up). *Acta*
- 12 *Neurol Scand* 2013;**127**:295-300.
- 13 53. D'Amelio M, Ragonese , Morganette L, *et al.* Long-term
- 14 survival of Parkinson's disease. A population-based study. *J*
- 15 *Neurol* 2006;**253**:33-7.
- 16 54. Estenne M, Hubert M, De Troyer A. Respiratory-muscle
- 17 involvement in Parkinson's disease. *N Engl J Med*
- 18 1984;**311**:1516–17.
- 19 55. Sabate M, Gonzalez I, Ruperez F, *et al.* Obstructive and
- 20 restrictive pulmonary dysfunctions in Parkinson's disease. *J*
- 21 *Neurol Sci* 1996;**138**:114–119.
- 22 56. Wang Y, Shao W-b, Gao L, *et al.* Abnormal Pulmonary
- 23 Function and Respiratory Muscle Strength Findings in
- 24 Chinese Patients with Parkinson's Disease and Multiple
- 25 System Atrophy—Comparison with Normal Elderly. *PLoS*
- 26 *ONE* 2014;**9**:e116123:doi:10.1371/journal.pone.0116123.
- 27 57. Hobson JP, Meara RJ. The Denbighshire cohort risk and
- 28 incidence of Mild Cognitive Impairment and its progression
- 29 to Parkinson's disease dementia at 16-years. *Int J Geriatr*
- 30 *Psychiatr* 2015;**30**:1048-55.
- 31 58. Romero JP, Benito-Leon J, Mitchell AJ, *et al.* Under
- 32 reporting of dementia deaths on death certificates using
- 33 data from a population-based study (NEDICES). *J*
- 34 *Alzheimers Dis* 2014;**39**:741-8.
- 35 59. Sleeman KE, Ho YK, Verne J, *et al.* Reversal of English
- 36 trend towards hospital death in dementia: a population-
- 37 based study of place of death and associated individual and
- 38 regional factors, 2001–2010. *BMC Neurology* 2014;**14**:
- 39 doi:10.1186/1471-2377-14-59.
- 40 60. Perera G, Stewart R, Higginson IJ, *et al.* Reporting of
- 41 clinically diagnosed dementia on death certificates:
- 42 retrospective cohort study. *Age Ageing* 2016;**45**: 668-73.
- 43 61. Garcia-Ptacek S, Kåreholt I, Cermakova P, *et al.* Causes of
- 44 Death According to Death Certificates in Individuals with
- 45 Dementia: A Cohort from the Swedish Dementia Registry. *J*
- 46 *Am Geriatr Soc.* 2016; **64**: e137-142:doi:10.1111/jgs.14421.
- 47 62. Moens K, Houttekier D, Van den Block L, *et al.* Place of
- 48 death of people living with Parkinson's disease: a
- 49 population-level study in 11 countries. *BMC Palliat*
- 50 *Care* 2015;**14**:28:doi:10.1186/s12904-015-0021-3.
- 51 63. Bajaj A, Driver JA, Schernhammer ES. Parkinson's disease
- 52 and cancer risk: a systematic review and meta-analysis.
- 53 *Cancer Causes Control* 2010;**21**:697-07.
- 54 64. Abou-Sleiman PM, Muqit MM, Wood NW. Expanding
- 55 insights of mitochondrial dysfunction in Parkinson's disease.
- 56 *Nat Rev Neurosci* 2006;**7**:207-19.
- 57
- 58
- 59
- 60

- 1  
2  
3 65. Dawson TM, Dawson VL. The role of parkin in familial and  
4 sporadic Parkinson's disease. *Mov Disord* 2010;**25**:S32-9.  
5 66. Sorensen SA, Fenger K. Causes of death in patients with  
6 Huntington's disease and in unaffected first degree  
7 relatives. *J Med Genet* 1992;**29**:911-14.  
8 67. Romero JP, Benito-León J, Louis ED, *et al.* Alzheimer's  
9 disease is associated with decreased risk of cancer-specific  
10 mortality: a prospective study (NEDICES). *J Alzheimers*  
11 *Dis* 2014;**40**:465-73.  
12 68. Driver JA, Beiser A, Au R, *et al.* Inverse association  
13 between cancer and Alzheimer's disease: results from the  
14 Framingham Heart Study *BMJ* 2012;**344**:  
15 e1442:doi.org/10.1136/bmj.e1442.  
16 69. Benito-León J, Romero JP, Louis ED, *et al.* Faster cognitive  
17 decline in elders without dementia and decreased risk of  
18 cancer mortality. *Neurology* 2014;**82**:1441-1448.  
19 70. Goetz CG, Lutge W, Tanner CM. Autonomic dysfunction in  
20 Parkinson's disease. *Neurology* 1986;**36**:73-5.  
21 71. Stubendorff K, Aarsland D, Minthon L, *et al.* The Impact of  
22 Autonomic Dysfunction on Survival in Patients with  
23 Dementia with Lewy Bodies and Parkinson's Disease with  
24 Dementia. *PLoS One*. 2012;**7**:  
25 e45451.doi:10.1371/journal.pone.0045451  
26 72. Xin W, Lin Z, Mi S. Orthostatic hypotension and mortality  
27 risk: a meta-analysis of cohort studies. *Heart* 2014;**100**:406-  
28 13.  
29  
30  
31  
32  
33  
34  
35  
36  
37  
38  
39  
40  
41  
42  
43  
44  
45  
46  
47  
48  
49  
50  
51  
52  
53  
54  
55  
56  
57  
58  
59  
60

**Figure legend:**

Figure 1.  
Kaplan-Meier survival curves for all cause mortality in the PD and control cohorts.

Table 1:  
Demographic and clinical outcomes (Means, *standard deviations*) of the PD and control cohorts

|                            | Parkinson's disease | Control     | <i>p</i> < 0.05 |
|----------------------------|---------------------|-------------|-----------------|
| Gender (female %)          | 44%                 | 41%         | NS              |
| Age (entry into study)     | 74.2 (8.6)          | 74.8 (6.6)  | NS              |
| Age at death               | 80.7 (7.1)          | 81.9 (6.3)  | NS              |
| Institutional care %       | 52%                 | 30%         | 0.003           |
| Place of death(Hospital)   | 37%                 | 74%         | 0.002           |
| GDS-15                     | 5.6 (2.2)           | 3.7 (1.1)   | 0.001           |
| EQ-5D (Weighted health)    | 0.58 (0.36)         | 0.79 (0.28) | 0.001           |
| EQ-5D (VAS %) <sup>†</sup> | 55 (16.5)           | 77 (17.6)   | 0.001           |
| Onset of PD                | 67.3 (10.7)         | -----       | -----           |
| Duration of PD             | 13.2 (8.8)          | -----       | -----           |
| UPDRS (motor section)      | 27.9 (11.7)         | -----       | -----           |
| H & Y                      | 2.9 (0.74)          | -----       | -----           |
| PADL                       | 3.1 (1.1)           | -----       | -----           |

<sup>†</sup> VAS = EQ-%D Visual analogue scale

Table 2.

Primary cause of death (Part 1a death certificates) reported for the PD (n =158) and control (n =34) cohorts.

|                     | Parkinson's disease | Control   |
|---------------------|---------------------|-----------|
| Pneumonia           | 84 (53.2%)          | 6 (17.6%) |
| Cardiac             | 33 (20.9%)          | 9 (26.5%) |
| Cancer              | 10 ( 6.3%)          | 8 (23.5%) |
| Cerebrovascular     | 12 ( 7.6%)          | 4 (11.8%) |
| Parkinson's disease | 7 ( 4.4%)           | 0         |
| Other*              | 12                  | 7         |

\* Other includes, Sepsis; Dementia; Immobility; Chronic obstructive pulmonary disease; Old age; Fracture neck of Femur; Multi-organ failure; Motor Neurone disease.

1  
2  
3 **Funding:** This research received no specific grant from any funding  
4 agency in the public, commercial or not-for-profit sectors.  
5

6 **Contributors:** PH and RJM conceived and designed the study,  
7 collected the data, and managed the database. PH managed the  
8 database, contributed to data cleaning, performed the statistical  
9 analyses. PH and RJM contributed to interpretation of the data. PH  
10 and RJM wrote the manuscript. All authors critically reviewed the  
11 manuscript and approved the final version to be published.  
12

13 **Competing interests:** None declared.  
14

15 **Patient consent:** All participants gave their informed and written  
16 consent on participation.  
17

18 **Data sharing statement:** No additional data available.  
19  
20  
21  
22  
23  
24  
25  
26  
27  
28  
29  
30  
31  
32  
33  
34  
35  
36  
37  
38  
39  
40  
41  
42  
43  
44  
45  
46  
47  
48  
49  
50  
51  
52  
53  
54  
55  
56  
57  
58  
59  
60

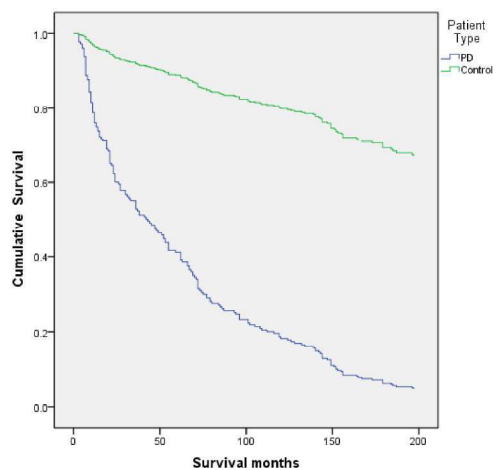

Figure 1.  
Kaplan-Meier survival curves for all cause mortality in the PD and control cohorts

297x420mm (300 x 300 DPI)

**STROBE 2007 (v4) checklist of items to be included in reports of observational studies in epidemiology\***  
**Checklist for cohort, case-control, and cross-sectional studies (combined)**

| Section/Topic             | Item # | Recommendation                                                                                                                                                                                                                                                                                                                                                                                                                                                         | Reported on page # |
|---------------------------|--------|------------------------------------------------------------------------------------------------------------------------------------------------------------------------------------------------------------------------------------------------------------------------------------------------------------------------------------------------------------------------------------------------------------------------------------------------------------------------|--------------------|
| Title and abstract        | 1      | (a) Indicate the study’s design with a commonly used term in the title or the abstract                                                                                                                                                                                                                                                                                                                                                                                 | 1                  |
|                           |        | (b) Provide in the abstract an informative and balanced summary of what was done and what was found                                                                                                                                                                                                                                                                                                                                                                    | 2                  |
| <b>Introduction</b>       |        |                                                                                                                                                                                                                                                                                                                                                                                                                                                                        |                    |
| Background/rationale      | 2      | Explain the scientific background and rationale for the investigation being reported                                                                                                                                                                                                                                                                                                                                                                                   | 3                  |
| Objectives                | 3      | State specific objectives, including any pre-specified hypotheses                                                                                                                                                                                                                                                                                                                                                                                                      | 3,4                |
| <b>Methods</b>            |        |                                                                                                                                                                                                                                                                                                                                                                                                                                                                        |                    |
| Study design              | 4      | Present key elements of study design early in the paper                                                                                                                                                                                                                                                                                                                                                                                                                | 4                  |
| Setting                   | 5      | Describe the setting, locations, and relevant dates, including periods of recruitment, exposure, follow-up, and data collection                                                                                                                                                                                                                                                                                                                                        | 4                  |
| Participants              | 6      | (a) <i>Cohort study</i> —Give the eligibility criteria, and the sources and methods of selection of participants. Describe methods of follow-up<br><i>Case-control study</i> —Give the eligibility criteria, and the sources and methods of case ascertainment and control selection. Give the rationale for the choice of cases and controls<br><i>Cross-sectional study</i> —Give the eligibility criteria, and the sources and methods of selection of participants | 4                  |
|                           |        | (b) <i>Cohort study</i> —For matched studies, give matching criteria and number of exposed and unexposed<br><i>Case-control study</i> —For matched studies, give matching criteria and the number of controls per case                                                                                                                                                                                                                                                 | 4                  |
| Variables                 | 7      | Clearly define all outcomes, exposures, predictors, potential confounders, and effect modifiers. Give diagnostic criteria, if applicable                                                                                                                                                                                                                                                                                                                               | 4                  |
| Data sources/ measurement | 8*     | For each variable of interest, give sources of data and details of methods of assessment (measurement). Describe comparability of assessment methods if there is more than one group                                                                                                                                                                                                                                                                                   | 4,5                |
| Bias                      | 9      | Describe any efforts to address potential sources of bias                                                                                                                                                                                                                                                                                                                                                                                                              | 5,6,8              |
| Study size                | 10     | Explain how the study size was arrived at                                                                                                                                                                                                                                                                                                                                                                                                                              | n/a                |
| Quantitative variables    | 11     | Explain how quantitative variables were handled in the analyses. If applicable, describe which groupings were chosen and why                                                                                                                                                                                                                                                                                                                                           | n/a                |
| Statistical methods       | 12     | (a) Describe all statistical methods, including those used to control for confounding                                                                                                                                                                                                                                                                                                                                                                                  | 5                  |
|                           |        | (b) Describe any methods used to examine subgroups and interactions                                                                                                                                                                                                                                                                                                                                                                                                    | 5                  |
|                           |        | (c) Explain how missing data were addressed                                                                                                                                                                                                                                                                                                                                                                                                                            | n/a                |
|                           |        | (d) <i>Cohort study</i> —If applicable, explain how loss to follow-up was addressed<br><i>Case-control study</i> —If applicable, explain how matching of cases and controls was addressed                                                                                                                                                                                                                                                                              | n/a                |

|                          |     |                                                                                                                                                                                                              |     |
|--------------------------|-----|--------------------------------------------------------------------------------------------------------------------------------------------------------------------------------------------------------------|-----|
|                          |     | <i>Cross-sectional study</i> —If applicable, describe analytical methods taking account of sampling strategy                                                                                                 |     |
|                          |     | (e) Describe any sensitivity analyses                                                                                                                                                                        | n/a |
| <b>Results</b>           |     |                                                                                                                                                                                                              |     |
| Participants             | 13* | (a) Report numbers of individuals at each stage of study—eg numbers potentially eligible, examined for eligibility, confirmed eligible, included in the study, completing follow-up, and analysed            | 5   |
|                          |     | (b) Give reasons for non-participation at each stage                                                                                                                                                         | n/a |
|                          |     | (c) Consider use of a flow diagram                                                                                                                                                                           | --  |
| Descriptive data         | 14* | (a) Give characteristics of study participants (eg demographic, clinical, social) and information on exposures and potential confounders                                                                     | 5   |
|                          |     | (b) Indicate number of participants with missing data for each variable of interest                                                                                                                          | n/a |
|                          |     | (c) <i>Cohort study</i> —Summarise follow-up time (eg, average and total amount)                                                                                                                             | 5,6 |
| Outcome data             | 15* | <i>Cohort study</i> —Report numbers of outcome events or summary measures over time                                                                                                                          | 5,6 |
|                          |     | <i>Case-control study</i> —Report numbers in each exposure category, or summary measures of exposure                                                                                                         | 5,6 |
|                          |     | <i>Cross-sectional study</i> —Report numbers of outcome events or summary measures                                                                                                                           | --  |
| Main results             | 16  | (a) Give unadjusted estimates and, if applicable, confounder-adjusted estimates and their precision (eg, 95% confidence interval). Make clear which confounders were adjusted for and why they were included | 5,6 |
|                          |     | (b) Report category boundaries when continuous variables were categorized                                                                                                                                    | 5,6 |
|                          |     | (c) If relevant, consider translating estimates of relative risk into absolute risk for a meaningful time period                                                                                             | 5,6 |
| Other analyses           | 17  | Report other analyses done—eg analyses of subgroups and interactions, and sensitivity analyses                                                                                                               | 5,6 |
| <b>Discussion</b>        |     |                                                                                                                                                                                                              |     |
| Key results              | 18  | Summarise key results with reference to study objectives                                                                                                                                                     | 6   |
| Limitations              | 19  | Discuss limitations of the study, taking into account sources of potential bias or imprecision. Discuss both direction and magnitude of any potential bias                                                   | 8   |
| Interpretation           | 20  | Give a cautious overall interpretation of results considering objectives, limitations, multiplicity of analyses, results from similar studies, and other relevant evidence                                   | 8   |
| Generalisability         | 21  | Discuss the generalisability (external validity) of the study results                                                                                                                                        | 6-8 |
| <b>Other information</b> |     |                                                                                                                                                                                                              |     |
| Funding                  | 22  | Give the source of funding and the role of the funders for the present study and, if applicable, for the original study on which the present article is based                                                | 9   |

\*Give information separately for cases and controls in case-control studies and, if applicable, for exposed and unexposed groups in cohort and cross-sectional studies.

**Note:** An Explanation and Elaboration article discusses each checklist item and gives methodological background and published examples of transparent reporting. The STROBE checklist is best used in conjunction with this article (freely available on the Web sites of PLoS Medicine at <http://www.plosmedicine.org/>, Annals of Internal Medicine at <http://www.annals.org/>, and Epidemiology at <http://www.epidem.com/>). Information on the STROBE Initiative is available at [www.strobe-statement.org](http://www.strobe-statement.org).
